# Supplementary material for: An isoxazole strategy for the synthesis of alkyl 5-amino-4-cyano-1H-pyrrole-2-carboxylates – versatile building blocks for assembling pyrrolo-fused heterocycles
Source: Royal Society of Chemistry journal article supplement (doi:10.1039/d1ob00053e), 2021-01-01
Supplement: d1ob00053e1.pdf [file d1ob00053e1.pdf]

*Supplementary Information for*

**An isoxazole strategy for the synthesis of alkyl 5-amino-4-cyano-1*h*-pyrrole-2-carboxylates –  
versatile building blocks for assembling pyrrolo-fused heterocycles**

Anastasiya V. Agafonova, Liya D. Funt, Mikhail S. Novikov and Alexander F. Khlebnikov\*

*St. Petersburg State University, Institute of Chemistry, 7/9 Universitetskaya nab., St. Petersburg,  
199034 Russia*

*\*E-mail: a.khlebnikov@spbu.ru*

**Table of Contents**

|                                                        |     |
|--------------------------------------------------------|-----|
| 1. Computational details.....                          | S2  |
| 2. NMR spectra of new compounds.....                   | S6  |
| 3. X-ray crystal structure of compound <b>2b</b> ..... | S42 |
| 4. References.....                                     | S49 |

## 1. Computational details

All calculations were performed by using the Gaussian 16 suite of quantum chemical programs<sup>1</sup> at Resource center "Computer center of Saint Petersburg State University". Geometry optimizations of molecules were performed with the B3LYP<sup>2</sup>-D3<sup>3</sup> density functional method and 6-311+G(d,p) basis set using SMD<sup>4</sup> solvent model. Stationary points on the respective potential-energy surfaces were characterized at the same level of theory by evaluating the corresponding Hessian indices. Careful verification of the unique imaginary frequency for the transition state was carried out to check whether the frequency indeed pertains to the desired reaction coordinate.

**Table S1.** B3LYP-D3/6-311+G(d,p), SMD solvent model for 1,4-dioxane.

Absolute Energies (au), Cartesian Coordinates of stationary points

Molecule **4**

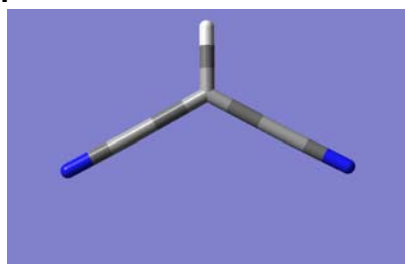

E = -224.552857, H (0K) = -224.521324,  
H (298K) = -224.515742,  
G (298K) = -224.548630 au.

Imaginary frequency = 0.

|   |            |            |            |
|---|------------|------------|------------|
| C | 1.2185480  | 0.0540320  | -0.0001770 |
| N | 2.2581960  | -0.4853280 | 0.0001020  |
| C | -1.2185390 | 0.0540120  | 0.0000020  |
| N | -2.2582150 | -0.4853090 | 0.0000180  |
| C | 0.0000080  | 0.7233120  | -0.0000130 |
| H | 0.0000370  | 1.8063190  | 0.0002890  |

Molecule **3b**

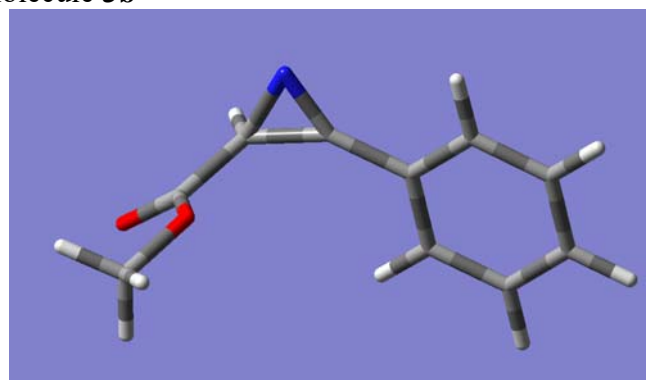

E = -591.816558, H (0K) = -591.647108,  
H (298K) = -591.634502,  
G (298K) = -591.686573 au.

Imaginary frequency = 0.

|   |            |            |            |
|---|------------|------------|------------|
| C | -0.0440690 | 1.0059010  | -0.2802810 |
| N | -0.7498180 | 1.9692060  | 0.1026070  |
| C | -2.4244840 | 0.0269520  | -0.4252200 |
| C | 1.2522750  | 0.3861590  | -0.1420650 |
| O | -3.3016780 | -0.4004380 | -1.1441760 |
| C | 2.2153660  | 0.9525080  | 0.7073740  |
| C | 3.4578230  | 0.3460490  | 0.8365840  |
| C | 3.7448850  | -0.8211510 | 0.1234350  |
| C | 2.7885560  | -1.3850690 | -0.7207160 |
| C | 1.5408380  | -0.7840660 | -0.8550250 |
| O | -2.2872360 | -0.3008180 | 0.8706080  |
| C | -3.2779440 | -1.2005460 | 1.4074750  |
| H | 1.9785940  | 1.8569350  | 1.2559530  |
| H | 4.2047310  | 0.7787560  | 1.4921010  |
| H | 4.7165420  | -1.2907850 | 0.2279940  |
| H | 3.0150360  | -2.2905260 | -1.2715530 |
| H | 0.7873420  | -1.2120970 | -1.5065390 |
| H | -3.2559250 | -2.1553480 | 0.8787450  |
| H | -4.2751510 | -0.7642630 | 1.3270770  |
| H | -3.0083960 | -1.3392320 | 2.4527860  |
| C | -1.3669400 | 0.9616870  | -0.8971810 |
| H | -1.5205830 | 1.3116290  | -1.9125470 |

TS<sup>4-5</sup>

Molecule **5**

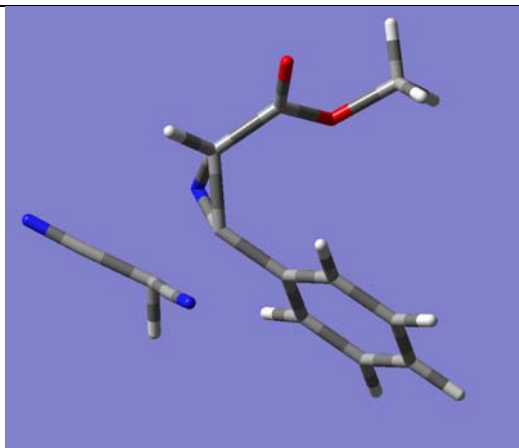

E = -816.354397, H (0K) = -816.151820,  
H (298K) = -816.134562,  
G (298K) = -816.196939 au.

Imaginary frequency = 1.

|   |            |            |            |
|---|------------|------------|------------|
| C | -3.3173110 | -0.3626180 | -0.5453570 |
| C | -0.6840100 | 0.0184320  | -0.6014470 |
| N | -0.8409410 | 0.8521690  | -1.6427840 |
| C | 0.2631680  | 2.2679980  | 0.2353630  |
| C | 0.5152320  | -0.8411040 | -0.3441640 |
| O | 0.1760020  | 3.0290780  | 1.1842090  |
| N | -4.2581260 | 0.1874630  | -0.9291150 |
| C | -2.1074110 | -1.3142750 | 1.2894410  |
| N | -2.0470580 | -1.5447550 | 2.4222470  |
| C | 1.0907030  | -1.5317130 | -1.4145420 |
| C | 2.2124290  | -2.3334030 | -1.2185160 |
| C | 2.7810860  | -2.4436140 | 0.0521780  |
| C | 2.2182870  | -1.7481230 | 1.1217840  |
| C | 1.0872480  | -0.9556730 | 0.9260830  |
| O | 1.4249360  | 2.0734180  | -0.4290660 |
| C | 2.5736500  | 2.7343040  | 0.1124740  |
| H | 0.6657370  | -1.4077150 | -2.4047420 |
| H | 2.6518490  | -2.8625580 | -2.0580650 |
| H | 3.6601040  | -3.0611870 | 0.2045750  |
| H | 2.6589900  | -1.8215000 | 2.1105740  |
| H | 0.6525030  | -0.4141640 | 1.7582130  |
| H | 2.7711320  | 2.3986440  | 1.1340600  |
| H | 2.4417590  | 3.8191830  | 0.1142980  |
| H | 3.4043640  | 2.4584220  | -0.5366010 |
| C | -2.0955760 | -0.9965000 | -0.1165170 |
| H | -1.9216690 | -1.8999350 | -0.7051080 |
| C | -0.8640140 | 1.4603830  | -0.2906430 |
| H | -1.8102930 | 1.7821480  | 0.1523990  |

TS<sup>5-7</sup>

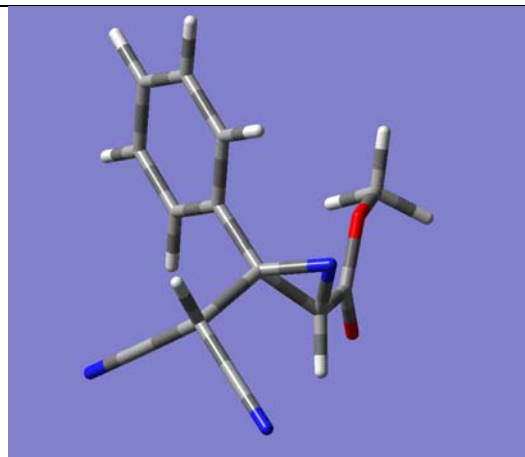

E = -816.354522, H (0K) = -816.151564,  
H (298K) = -816.133788,  
G (298K) = -816.197354 au.

Imaginary frequency = 0.

|   |            |            |            |
|---|------------|------------|------------|
| C | 3.3232020  | 0.2478790  | -0.5364390 |
| C | 0.7409750  | -0.0048290 | -0.5870000 |
| N | 0.8613770  | -0.8807300 | -1.6328900 |
| C | -0.2832390 | -2.2168230 | 0.2816790  |
| C | -0.4931250 | 0.8283300  | -0.3418110 |
| O | -0.2075300 | -2.9487780 | 1.2548340  |
| N | 4.2982270  | -0.3107280 | -0.7969150 |
| C | 2.1264320  | 1.4128380  | 1.1661060  |
| N | 2.1043000  | 1.7633460  | 2.2672050  |
| C | -1.1363930 | 1.4142360  | -1.4357730 |
| C | -2.2891670 | 2.1755830  | -1.2571000 |
| C | -2.8233460 | 2.3490320  | 0.0215580  |
| C | -2.1938570 | 1.7583050  | 1.1165230  |
| C | -1.0318290 | 1.0078170  | 0.9358200  |
| O | -1.4440690 | -2.0198330 | -0.3813300 |
| C | -2.6043760 | -2.6327430 | 0.1897150  |
| H | -0.7395110 | 1.2356580  | -2.4291210 |
| H | -2.7802840 | 2.6228240  | -2.1155550 |
| H | -3.7269720 | 2.9333900  | 0.1612130  |
| H | -2.6070870 | 1.8791380  | 2.1126410  |
| H | -0.5497440 | 0.5448790  | 1.7890930  |
| H | -2.7816350 | -2.2652230 | 1.2039490  |
| H | -2.5029660 | -3.7206690 | 0.2189220  |
| H | -3.4341810 | -2.3507640 | -0.4580500 |
| C | 2.0839300  | 0.9360200  | -0.2074810 |
| H | 1.9801830  | 1.7973720  | -0.8751490 |
| C | 0.8657220  | -1.4611110 | -0.2834030 |
| H | 1.7980970  | -1.8181320 | 0.1678590  |

Molecule 7

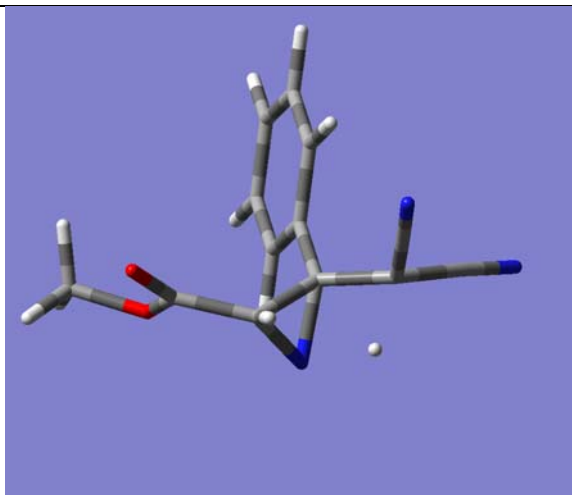

E = -816.325773, H (0K) = -816.126360,  
H (298K) = -816.109078,  
G (298K) = -816.171840 au.  
Imaginary frequency = 1.

|   |            |            |            |
|---|------------|------------|------------|
| C | 2.6919650  | -1.3033650 | 0.8396660  |
| C | 0.6187330  | -0.4642730 | -0.4397860 |
| N | 0.2793260  | -1.2154430 | -1.6514660 |
| C | -1.5269040 | -1.8246340 | 0.1042330  |
| C | 0.0189140  | 0.8486820  | -0.0539110 |
| O | -1.8971930 | -2.4972760 | 1.0480260  |
| N | 3.1112580  | -1.8562610 | 1.7690940  |
| C | 2.9515830  | 0.3853280  | -0.8504540 |
| N | 3.5850320  | 1.2341550  | -1.3193260 |
| C | -0.8329700 | 1.5213480  | -0.9341320 |
| C | -1.3915430 | 2.7468440  | -0.5786100 |
| C | -1.1059980 | 3.3166430  | 0.6627850  |
| C | -0.2522940 | 2.6532270  | 1.5447230  |
| C | 0.3083850  | 1.4286240  | 1.1873190  |
| O | -2.3619890 | -1.0427280 | -0.6047340 |
| C | -3.7045810 | -0.9431840 | -0.1102310 |
| H | -1.0504370 | 1.0564850  | -1.8874420 |
| H | -2.0488690 | 3.2605990  | -1.2728920 |
| H | -1.5402350 | 4.2718850  | 0.9389760  |
| H | -0.0203300 | 3.0901010  | 2.5104520  |
| H | 0.9725140  | 0.9175380  | 1.8767690  |
| H | -3.7141490 | -0.5439350 | 0.9067130  |
| H | -4.1985910 | -1.9175940 | -0.1179890 |
| H | -4.2144160 | -0.2571680 | -0.7857820 |
| C | 2.1493240  | -0.6866920 | -0.3340840 |
| H | 1.7510530  | -1.4276820 | -1.3433520 |
| C | -0.1124510 | -1.7847460 | -0.3727750 |
| H | 0.4346110  | -2.6301660 | 0.0516240  |

TS<sup>7-8</sup>

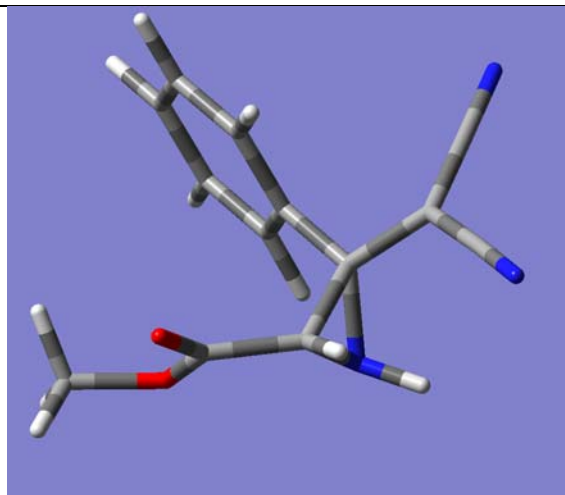

E = -816.403291, H (0K) = -816.197436,  
H (298K) = -816.180053,  
G (298K) = -816.243522 au.  
Imaginary frequency = 0.

|   |            |            |            |
|---|------------|------------|------------|
| C | 2.6424250  | 1.4454460  | -0.0032240 |
| C | 0.8312780  | -0.2570360 | -0.3891090 |
| C | -0.9675610 | -2.0266220 | 0.2782220  |
| C | -0.2000500 | 0.8168220  | -0.1557980 |
| O | -1.1618030 | -2.5216610 | 1.3706990  |
| N | 2.9799440  | 2.5641590  | 0.0067500  |
| C | 3.1859260  | -0.8826240 | 0.2287640  |
| N | 3.9505100  | -1.7496530 | 0.4080880  |
| C | -0.9466930 | 1.3490690  | -1.2069870 |
| C | -1.9030740 | 2.3340950  | -0.9652680 |
| C | -2.1311070 | 2.7883740  | 0.3329530  |
| C | -1.3894430 | 2.2563820  | 1.3886310  |
| C | -0.4262460 | 1.2812140  | 1.1440720  |
| O | -1.9550040 | -1.6760760 | -0.5615230 |
| C | -3.2913140 | -1.8020120 | -0.0482250 |
| H | -0.7816380 | 0.9744890  | -2.2093300 |
| H | -2.4720520 | 2.7456120  | -1.7926310 |
| H | -2.8767050 | 3.5537470  | 0.5213000  |
| H | -1.5565020 | 2.6053510  | 2.4021340  |
| H | 0.1603920  | 0.8756030  | 1.9607020  |
| H | -3.4185550 | -1.1817320 | 0.8415620  |
| H | -3.5196350 | -2.8412010 | 0.1987560  |
| H | -3.9436150 | -1.4504880 | -0.8462230 |
| C | 2.2326000  | 0.1100200  | 0.0002830  |
| C | 0.3945810  | -1.7042250 | -0.2267780 |
| H | 1.1476550  | -2.3797860 | 0.1655590  |
| N | 0.5753110  | -1.1202390 | -1.5632600 |
| H | 1.4668200  | -1.4329860 | -1.9414850 |

Molecule 8

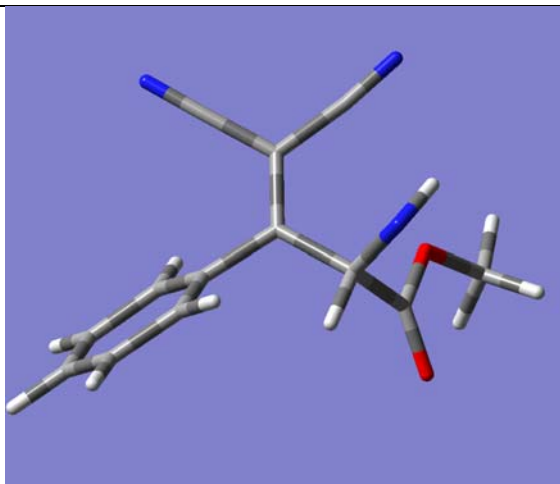

E = -816.361013, H (0K) = -816.157456,  
 H (298K) = -816.140182,  
 G (298K) = -816.202093 au.

Imaginary frequency = 1.

|   |            |            |            |
|---|------------|------------|------------|
| C | -0.5279370 | 2.5664600  | -0.2379660 |
| C | -0.0407450 | 0.2568780  | 0.4072020  |
| C | 1.7244780  | -1.5183720 | -0.0440860 |
| C | -1.4423090 | -0.1241990 | 0.1479720  |
| O | 1.7932410  | -2.7138300 | -0.2417610 |
| N | -1.2430240 | 3.4099780  | -0.5824900 |
| C | 1.7147880  | 2.0078870  | 0.3509590  |
| N | 2.7558930  | 2.5002830  | 0.4583000  |
| C | -2.0082350 | 0.0335560  | -1.1277700 |
| C | -3.3071770 | -0.3944770 | -1.3838440 |
| C | -4.0715490 | -0.9696140 | -0.3690330 |
| C | -3.5218190 | -1.1238870 | 0.9038850  |
| C | -2.2162080 | -0.7178430 | 1.1602120  |
| O | 2.4908680  | -0.6257330 | -0.7131460 |
| C | 3.4814510  | -1.1630790 | -1.6008730 |
| H | -1.4200450 | 0.4780070  | -1.9219260 |
| H | -3.7233090 | -0.2740860 | -2.3781820 |
| H | -5.0866300 | -1.2953740 | -0.5684020 |
| H | -4.1107840 | -1.5638140 | 1.7013910  |
| H | -1.7970910 | -0.8330270 | 2.1528680  |
| H | 3.0167700  | -1.7522300 | -2.3953850 |
| H | 4.1876650  | -1.7924180 | -1.0539380 |
| H | 3.9965890  | -0.3005350 | -2.0220600 |
| C | 0.3747450  | 1.5411550  | 0.1712070  |
| C | 0.8701440  | -0.8460920 | 1.0396120  |
| H | 0.1693390  | -1.6329990 | 1.3344920  |
| N | 1.6134240  | -0.4379300 | 2.1826830  |
| H | 2.4328080  | 0.0864210  | 1.8760880  |

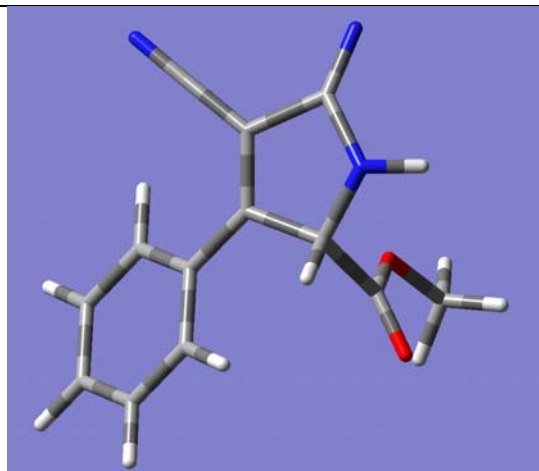

E = -816.389639, H (0K) = -816.182981,  
 H (298K) = -816.166131,  
 G (298K) = -816.227544 au.

Imaginary frequency = 0.

|   |            |            |            |
|---|------------|------------|------------|
| C | 0.5305550  | 2.8364480  | -0.2572680 |
| C | 0.1771800  | 0.5038890  | 0.4753920  |
| C | 1.0126860  | -1.8865810 | 0.2103110  |
| C | -1.2622590 | 0.2977910  | 0.2907180  |
| O | 0.8746870  | -3.0022400 | 0.6658440  |
| N | 0.1990350  | 3.8936020  | -0.5964270 |
| C | 2.4592340  | 1.2542810  | 0.3333530  |
| N | 3.4418170  | 1.8438010  | -0.1098910 |
| C | -1.9952050 | 1.0132580  | -0.6754960 |
| C | -3.3560490 | 0.7922890  | -0.8494990 |
| C | -4.0259520 | -0.1532770 | -0.0709450 |
| C | -3.3140140 | -0.8796210 | 0.8816420  |
| C | -1.9504440 | -0.6612780 | 1.0580850  |
| O | 1.1934160  | -1.6365330 | -1.0960440 |
| C | 1.2542650  | -2.7794160 | -1.9668340 |
| H | -1.4924360 | 1.7361100  | -1.3041350 |
| H | -3.8948050 | 1.3561610  | -1.6034470 |
| H | -5.0879860 | -0.3240580 | -0.2096750 |
| H | -3.8195670 | -1.6209420 | 1.4912880  |
| H | -1.4215390 | -1.2357460 | 1.8083580  |
| H | 0.3212620  | -3.3455630 | -1.9246830 |
| H | 2.0862110  | -3.4304920 | -1.6894150 |
| H | 1.4085590  | -2.3761230 | -2.9661680 |
| C | 0.9584200  | 1.5688770  | 0.1918720  |
| C | 1.0603420  | -0.6083040 | 1.0488340  |
| H | 0.7117740  | -0.9020800 | 2.0450910  |
| N | 2.3859210  | -0.0104850 | 1.1151760  |
| H | 3.1637530  | -0.6256570 | 0.9113910  |

## 2. NMR spectra of new compounds

### $^1\text{H}$ NMR spectra ( $\text{CDCl}_3$ , 400 MHz) of compound **1s**

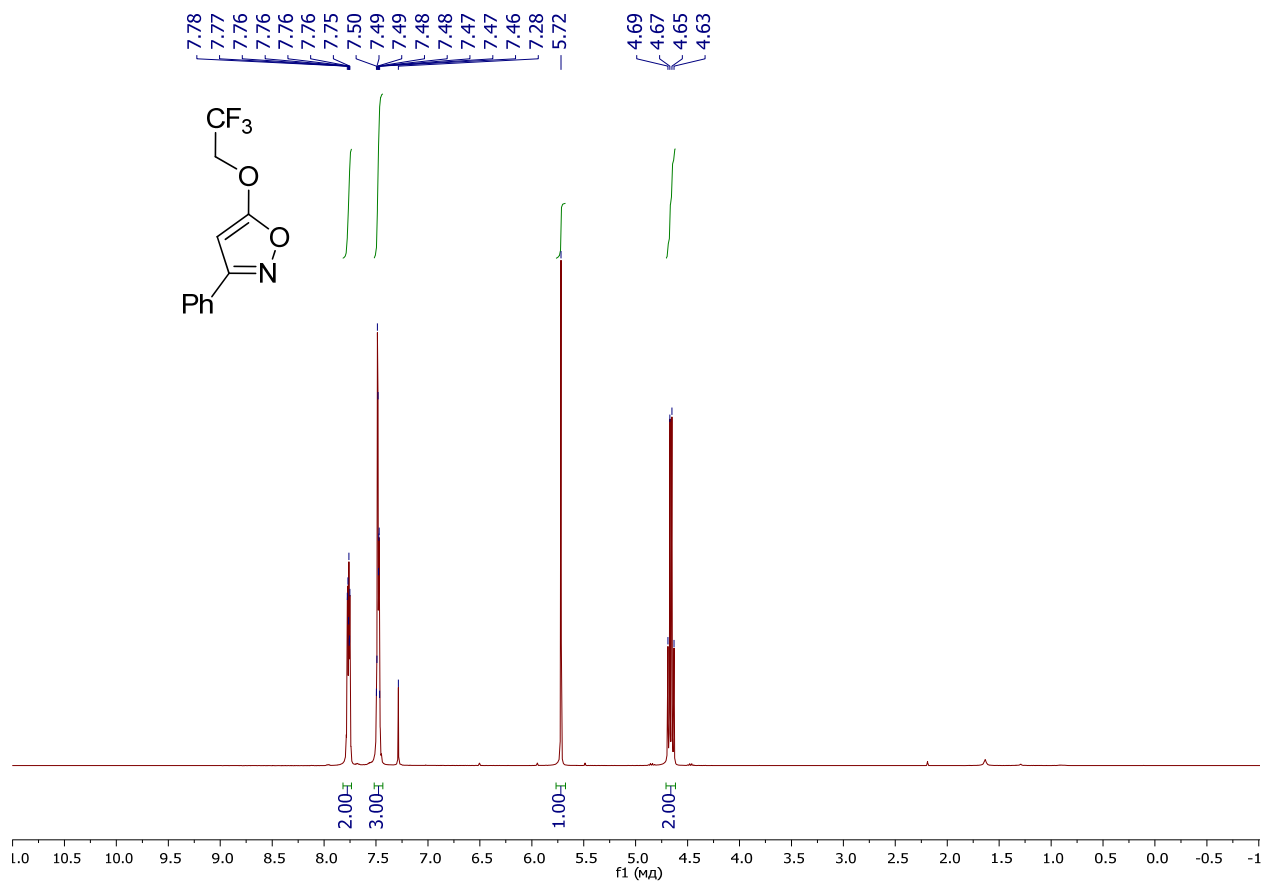

### $^{13}\text{C}$ NMR spectra ( $\text{CDCl}_3$ , 100 MHz) of compound **1s**

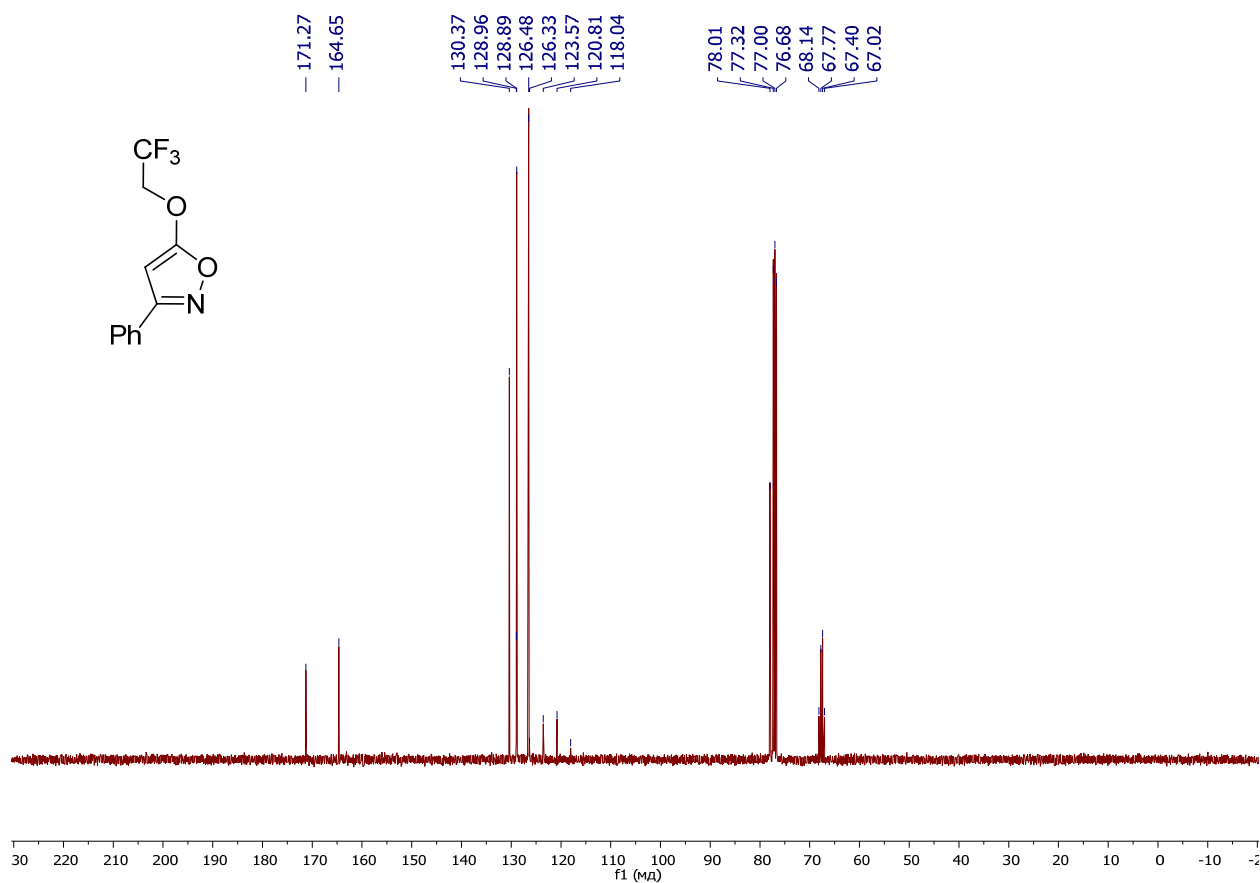

<sup>1</sup>H NMR spectra (DMSO-*d*<sub>6</sub>, 400 MHz) of compound **1t**

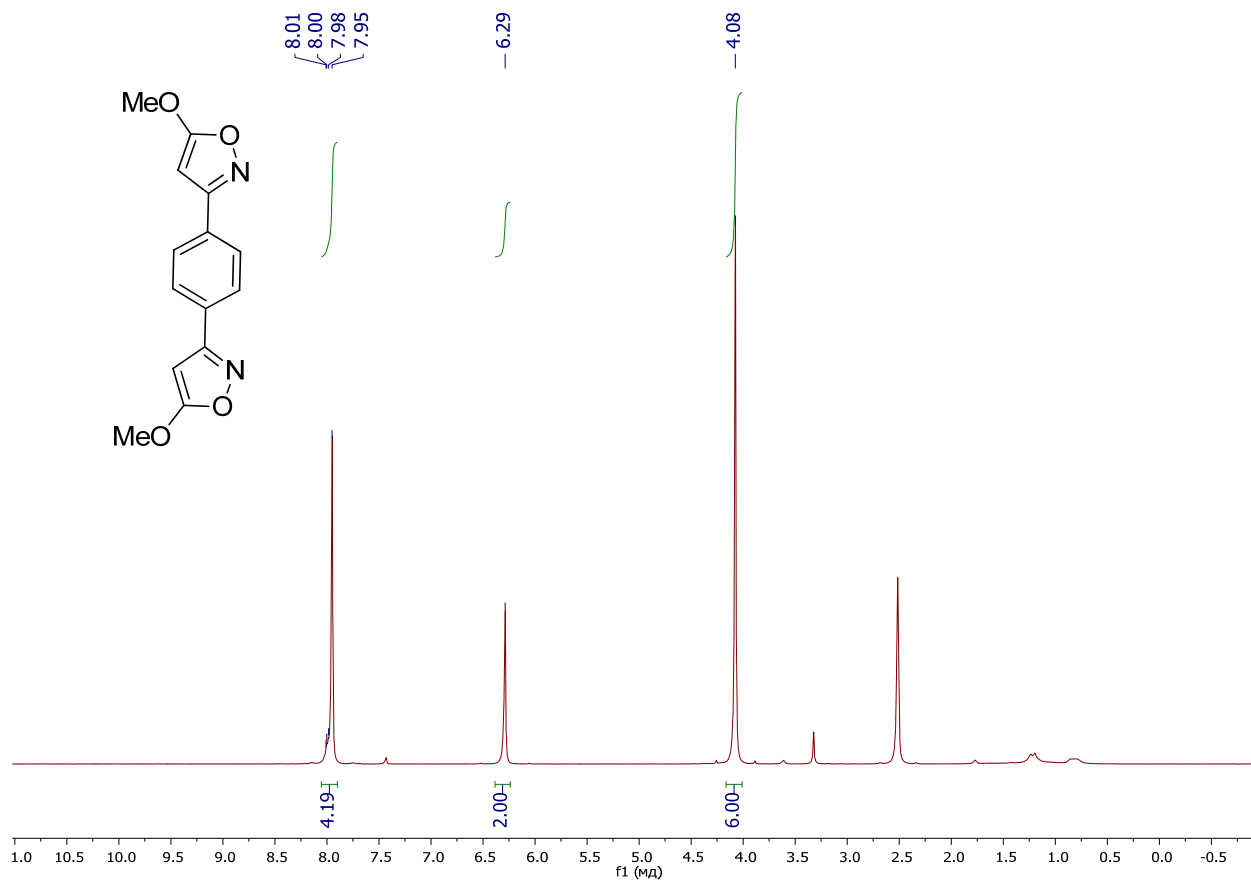

<sup>13</sup>C NMR spectra (DMSO-*d*<sub>6</sub>, 100 MHz) of compound **1t**

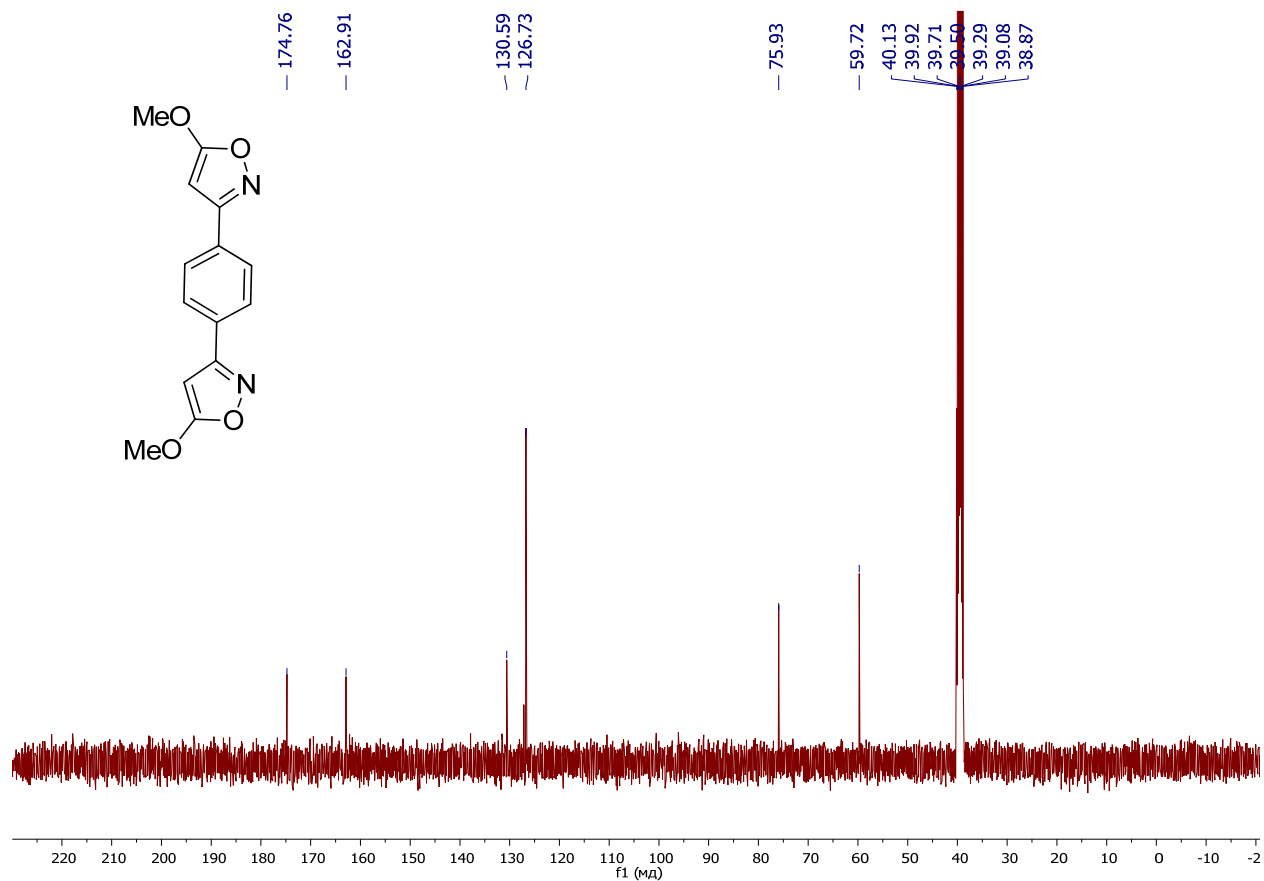

<sup>1</sup>H NMR spectra (DMSO-*d*<sub>6</sub>, 400 MHz) of compound **2a**

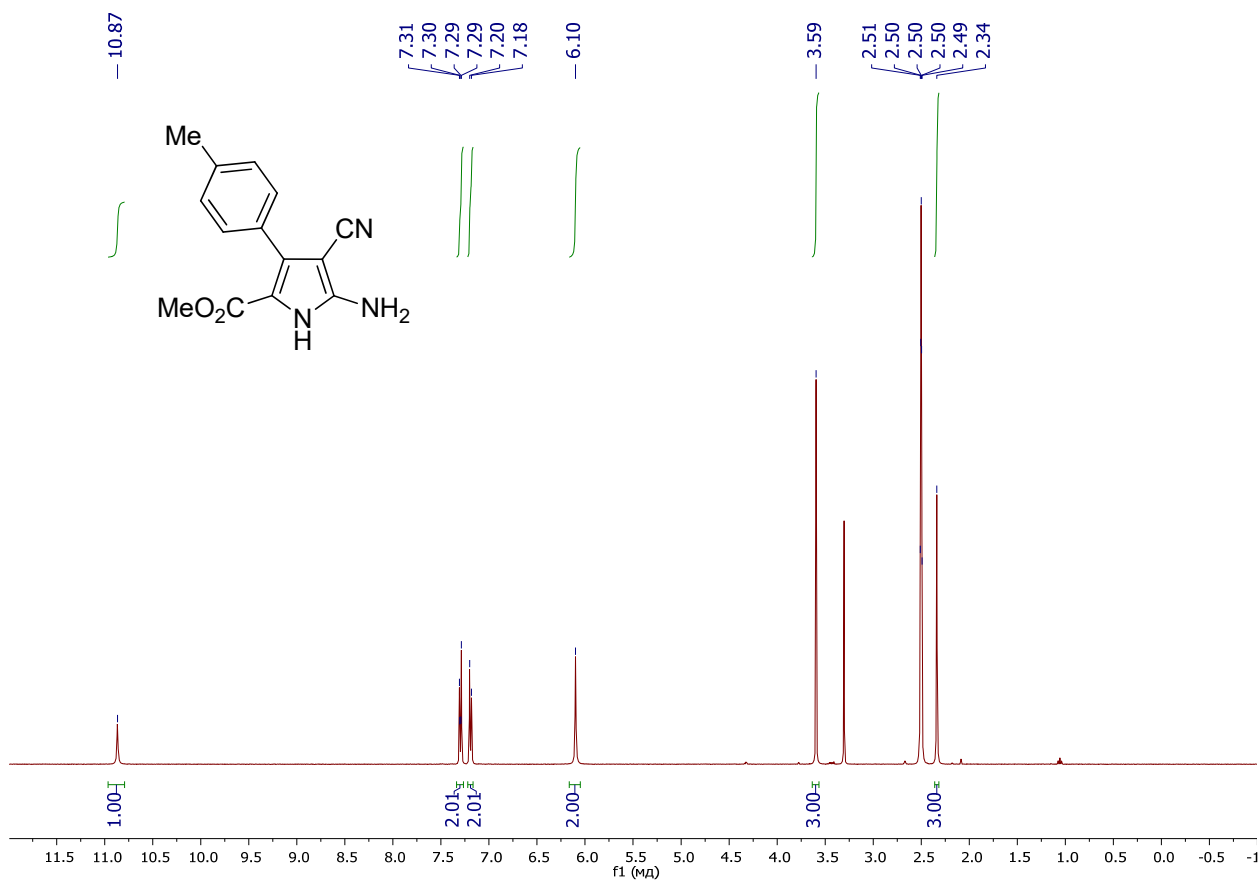

<sup>13</sup>C NMR spectra (DMSO-*d*<sub>6</sub>, 100 MHz) of compound **2a**

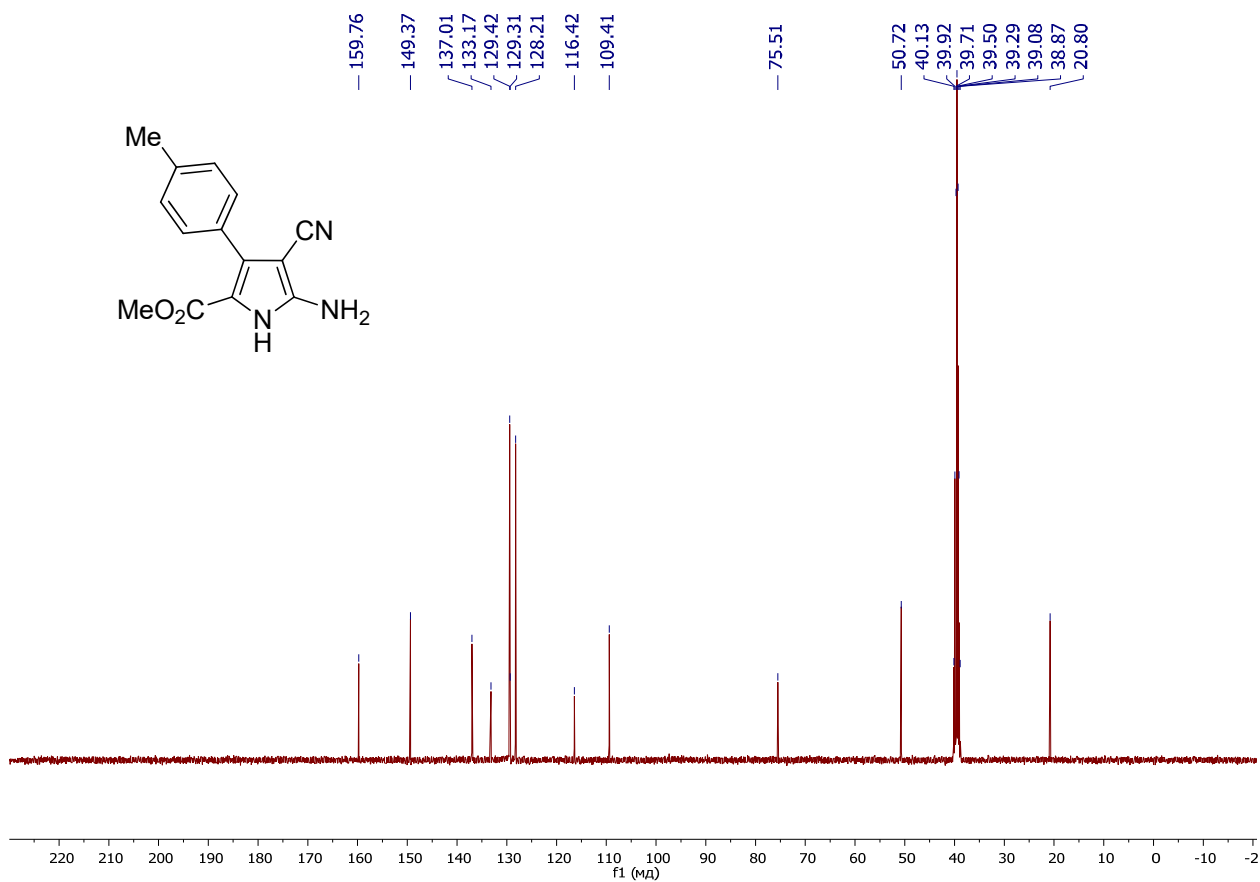



$^1\text{H}$  NMR spectra (DMSO- $d_6$ , 400 MHz) of compound **2b**

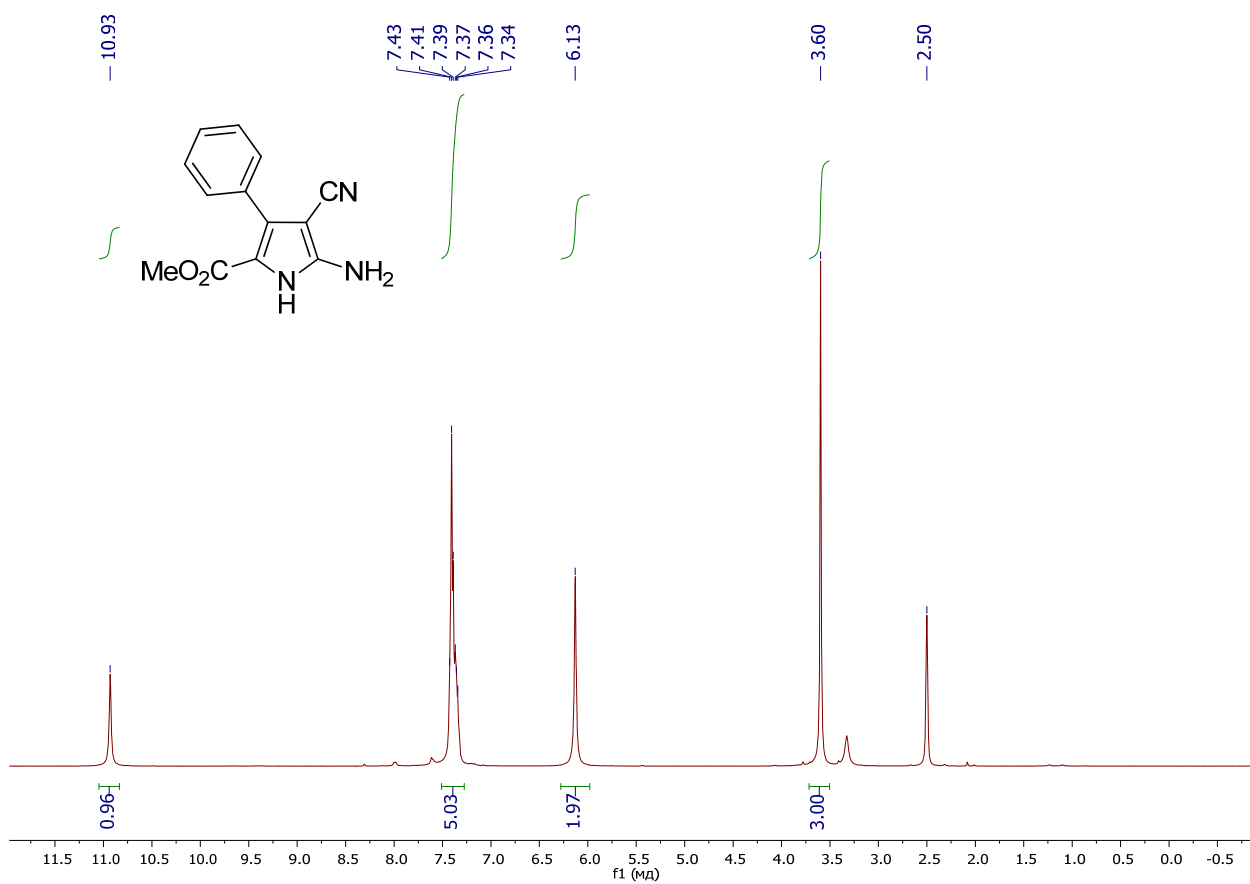

$^{13}\text{C}$  NMR spectra (DMSO- $d_6$ , 100 MHz) of compound **2b**

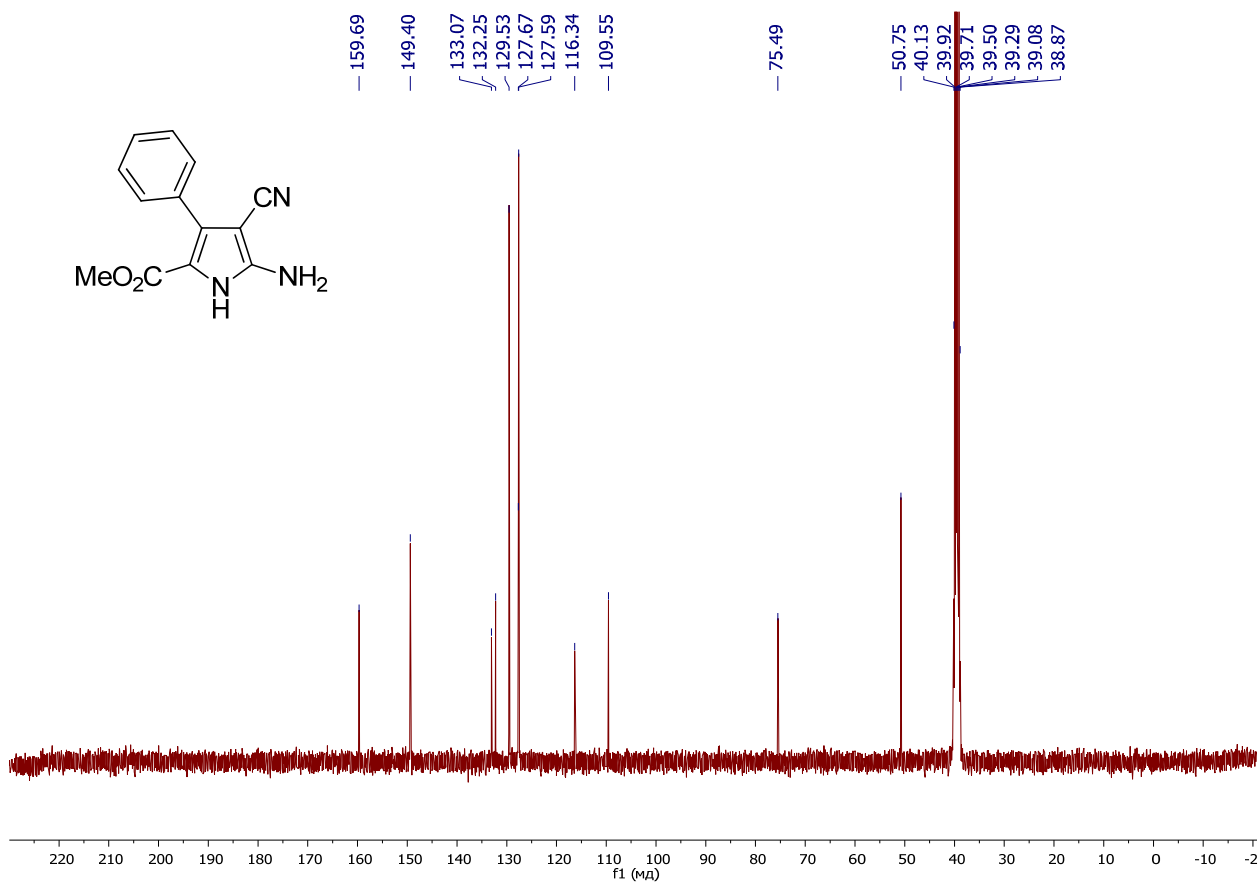

$^1\text{H}$  NMR spectra (DMSO- $d_6$ , 400 MHz) of compound **2c**

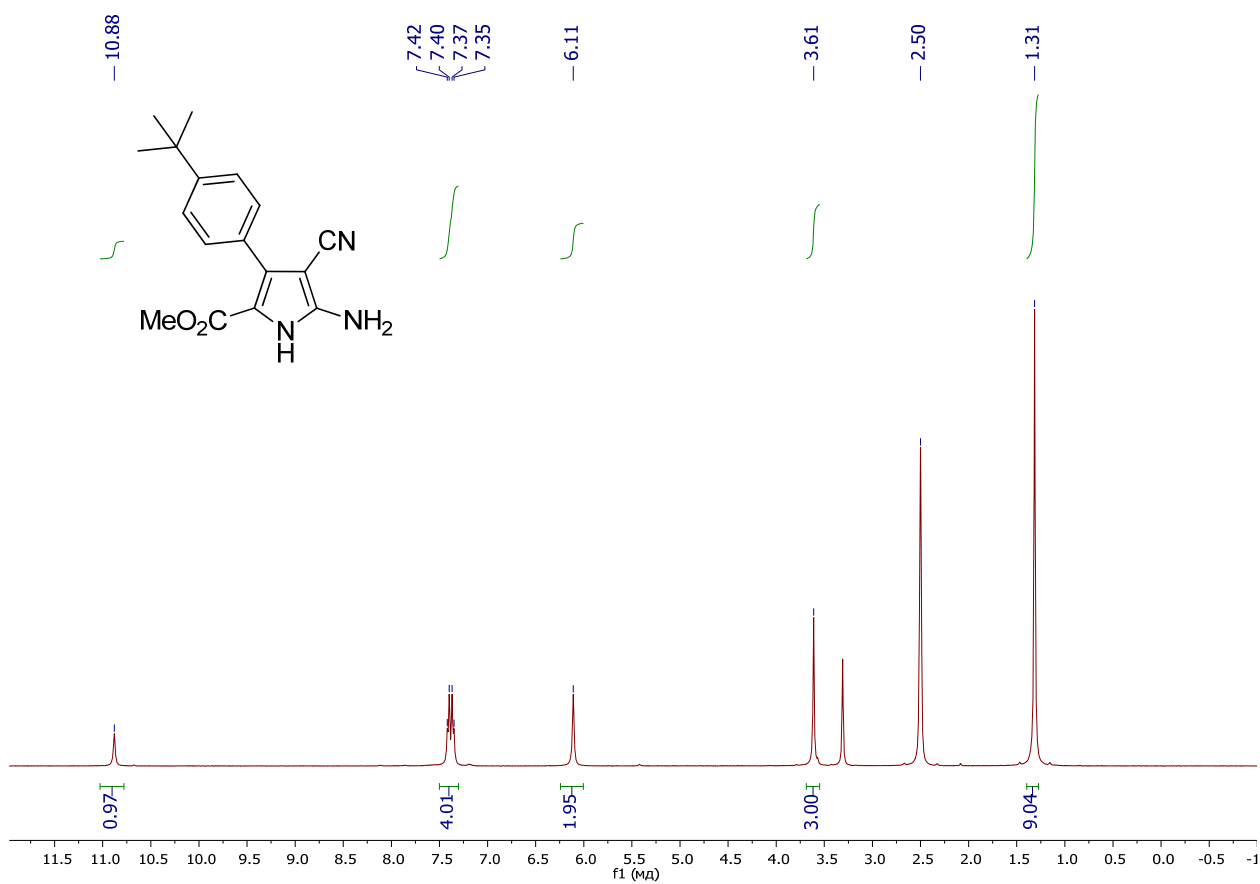

$^{13}\text{C}$  NMR spectra (DMSO- $d_6$ , 100 MHz) of compound **2c**

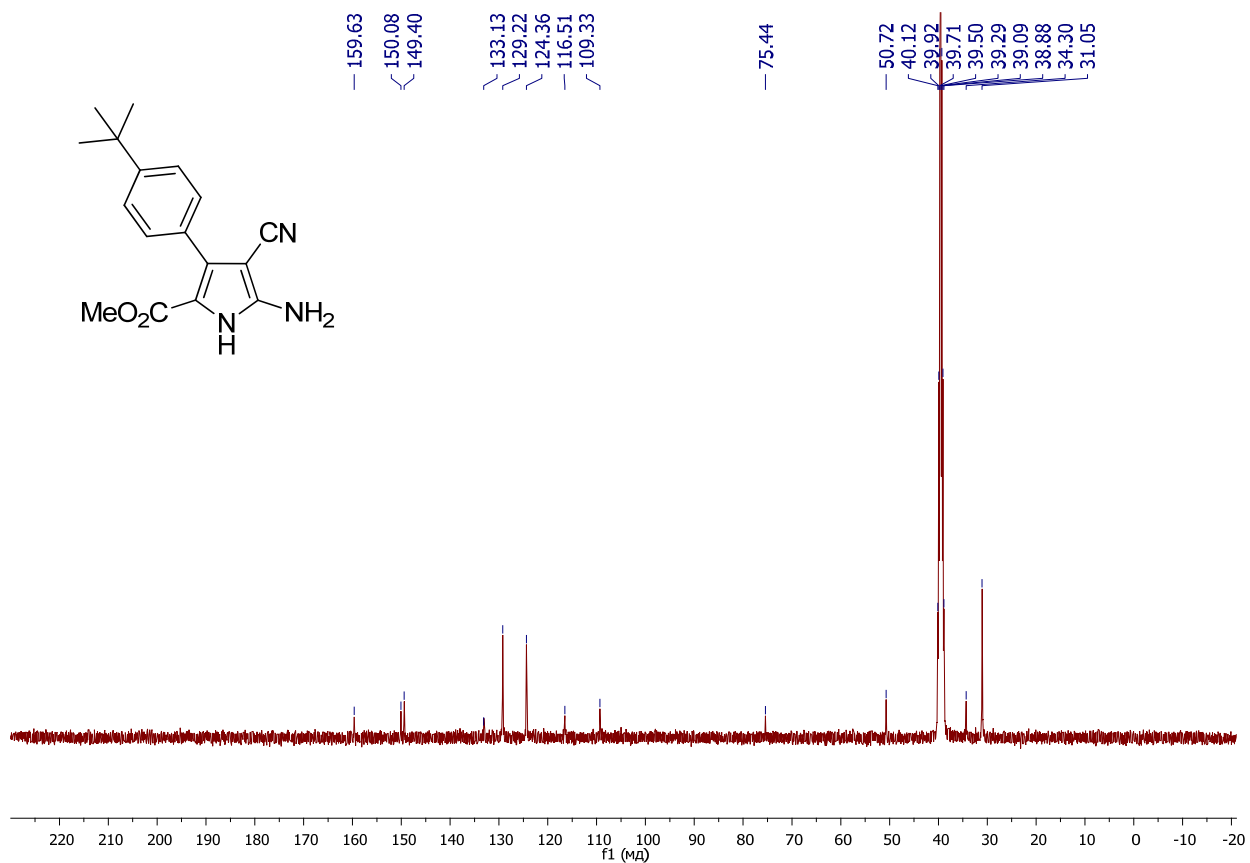

$^1\text{H}$  NMR spectra (DMSO- $d_6$ , 400 MHz) of compound **2d**

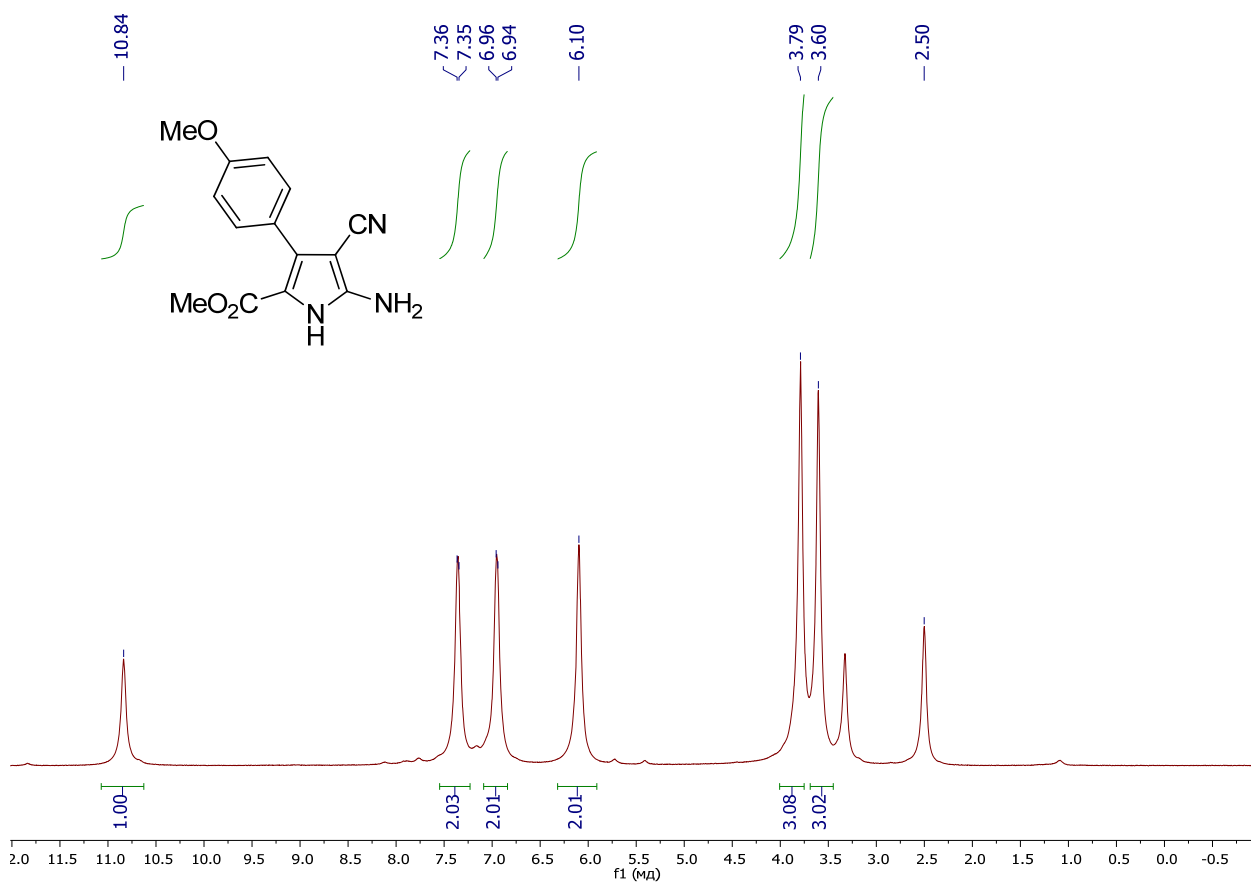

$^{13}\text{C}$  NMR spectra (DMSO- $d_6$ , 100 MHz) of compound **2d**

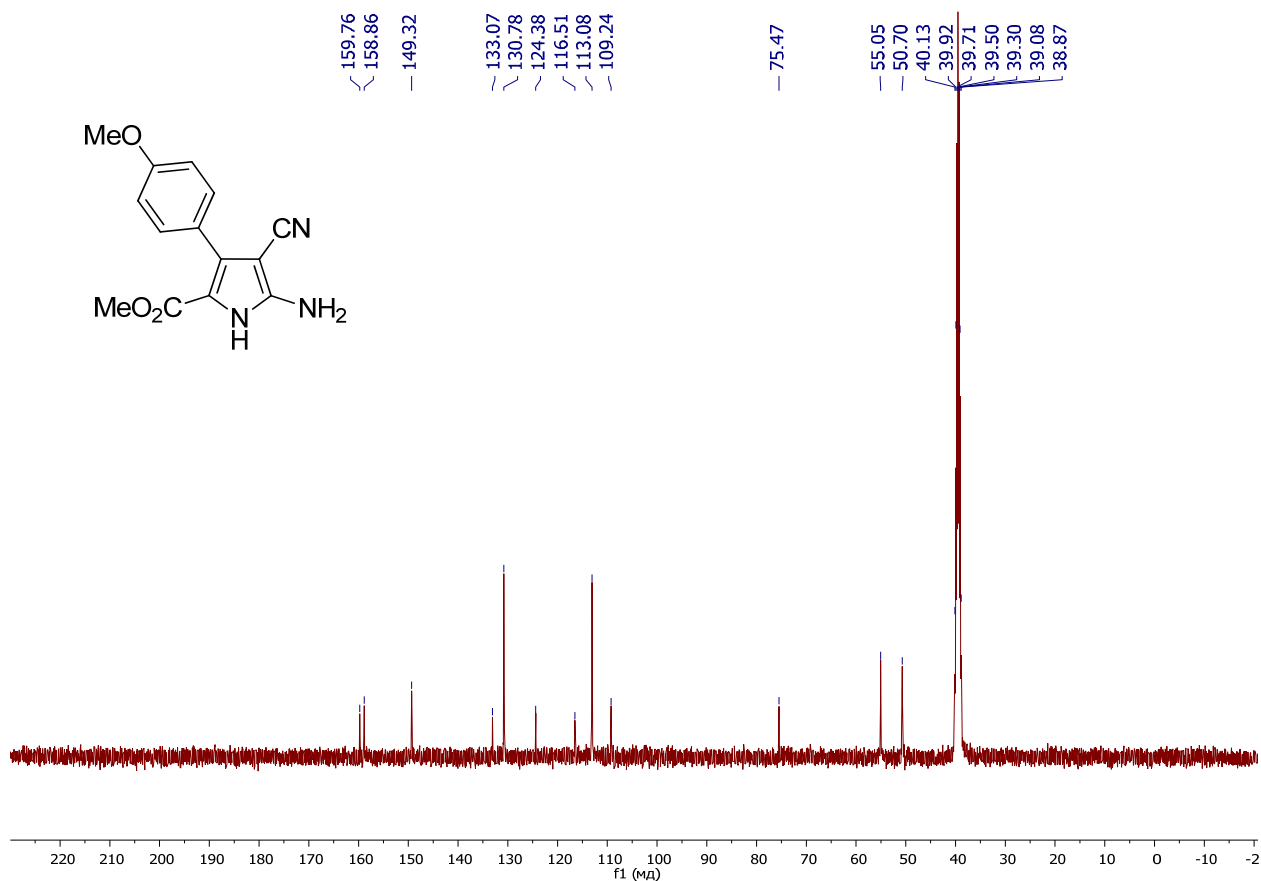

$^1\text{H}$  NMR spectra (DMSO- $d_6$ , 400 MHz) of compound **2e**

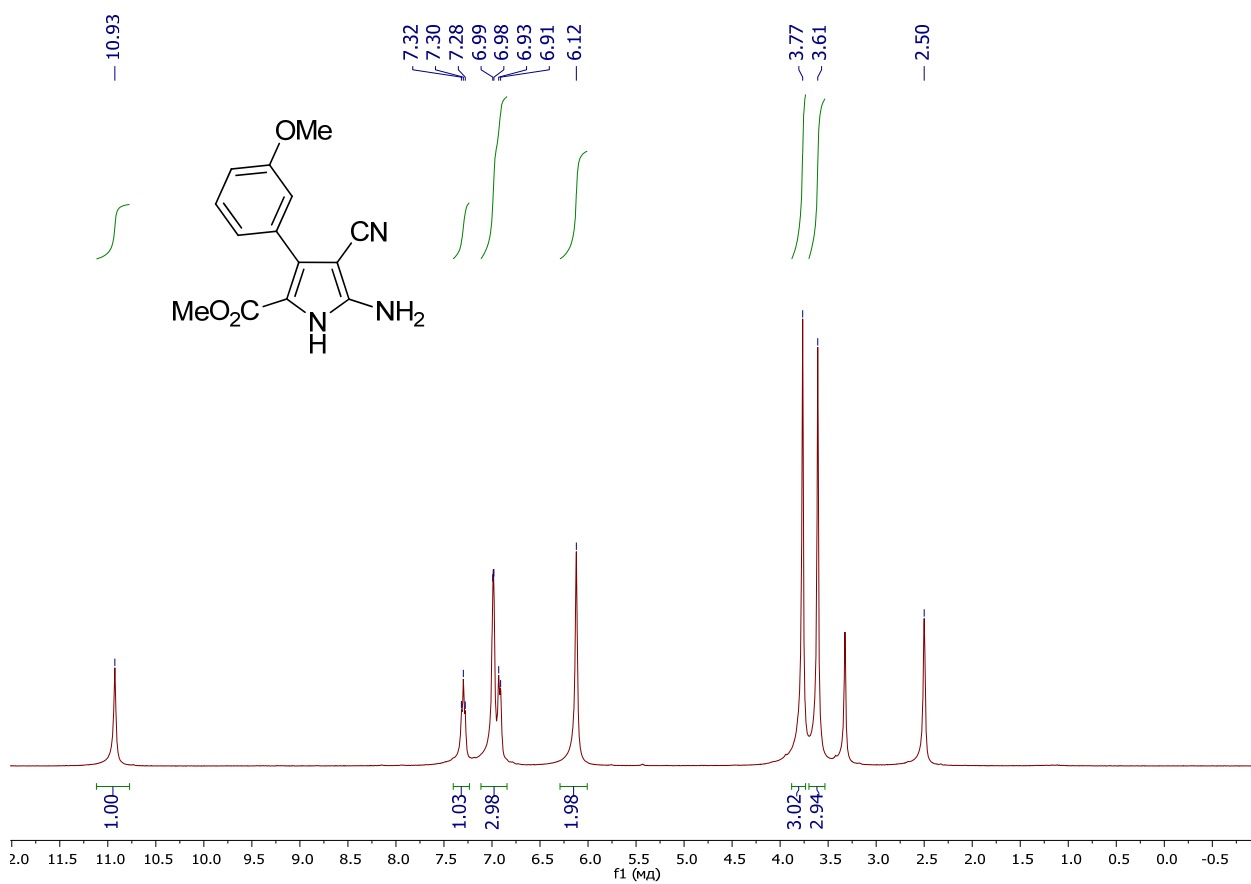

$^{13}\text{C}$  NMR spectra (DMSO- $d_6$ , 100 MHz) of compound **2e**

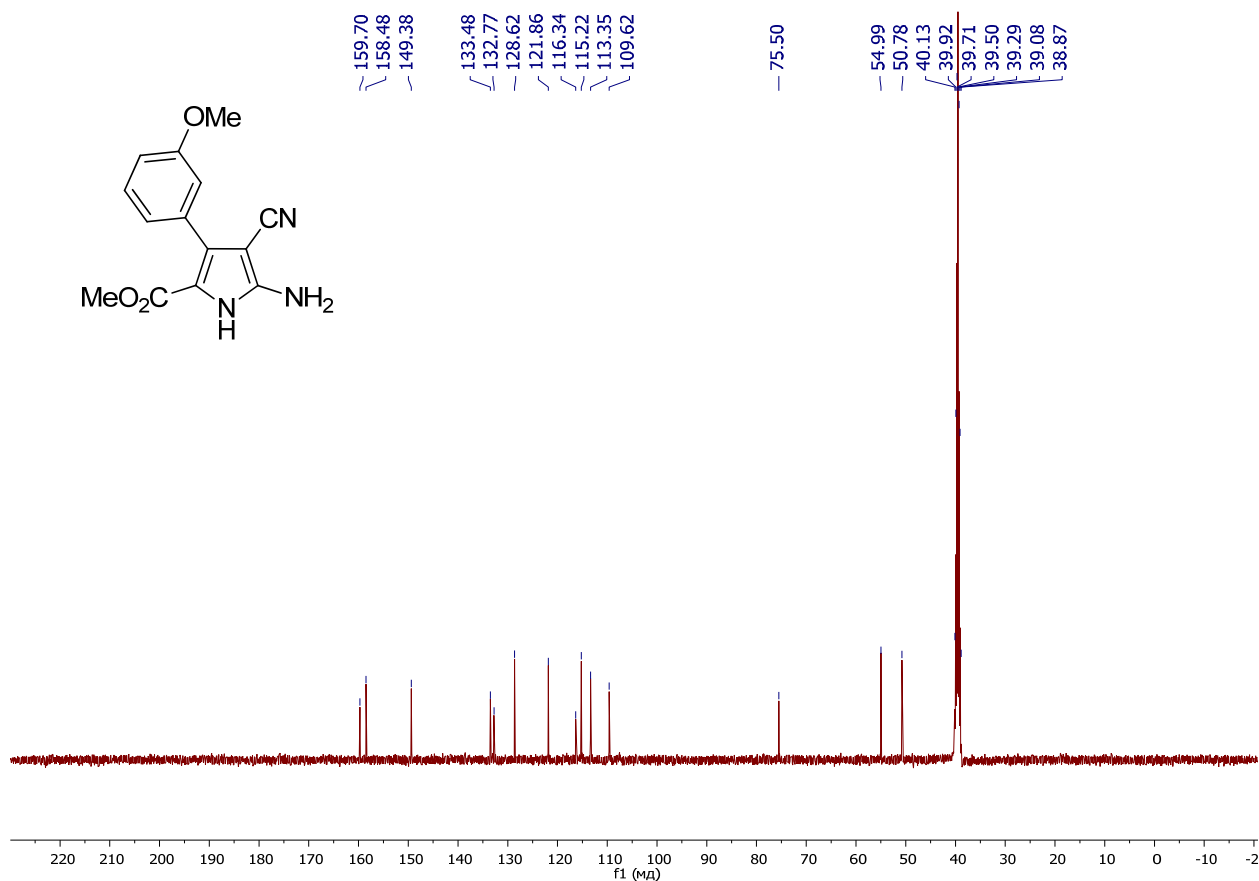

$^1\text{H}$  NMR spectra (DMSO- $d_6$ , 400 MHz) of compound **2f**

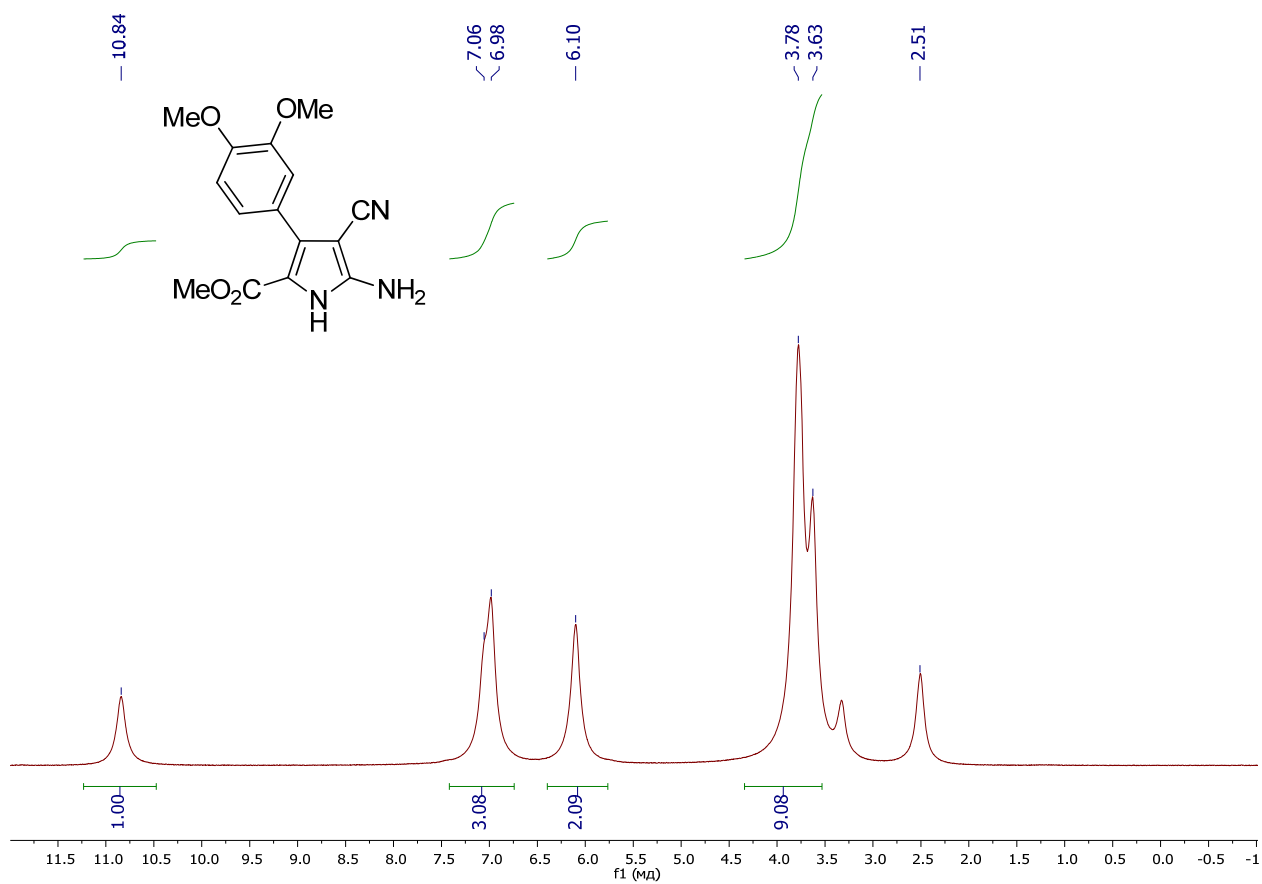

$^{13}\text{C}$  NMR spectra (DMSO- $d_6$ , 100 MHz) of compound **2f**

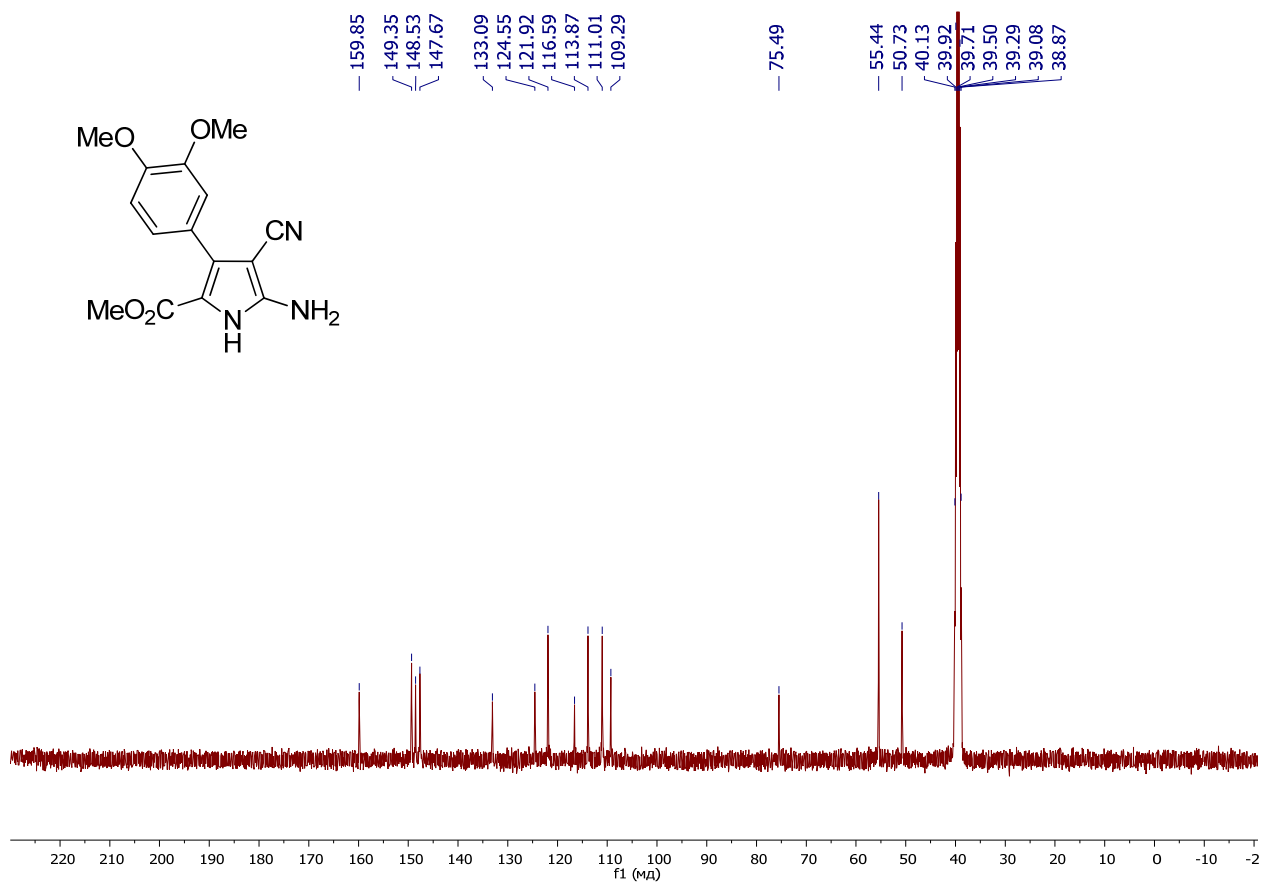

<sup>1</sup>H NMR spectra (DMSO-*d*<sub>6</sub>, 400 MHz) of compound **2g**

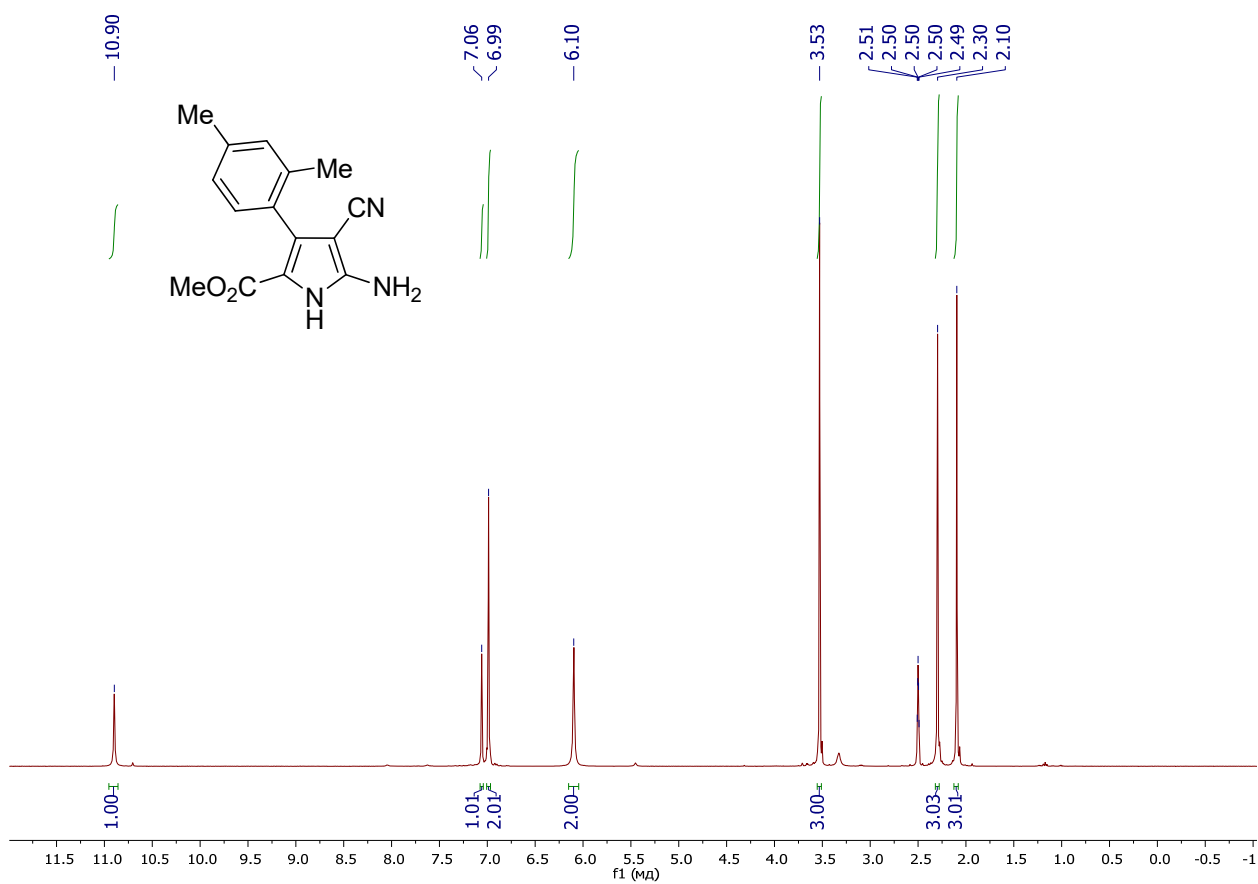

<sup>13</sup>C NMR spectra (DMSO-*d*<sub>6</sub>, 100 MHz) of compound **2g**

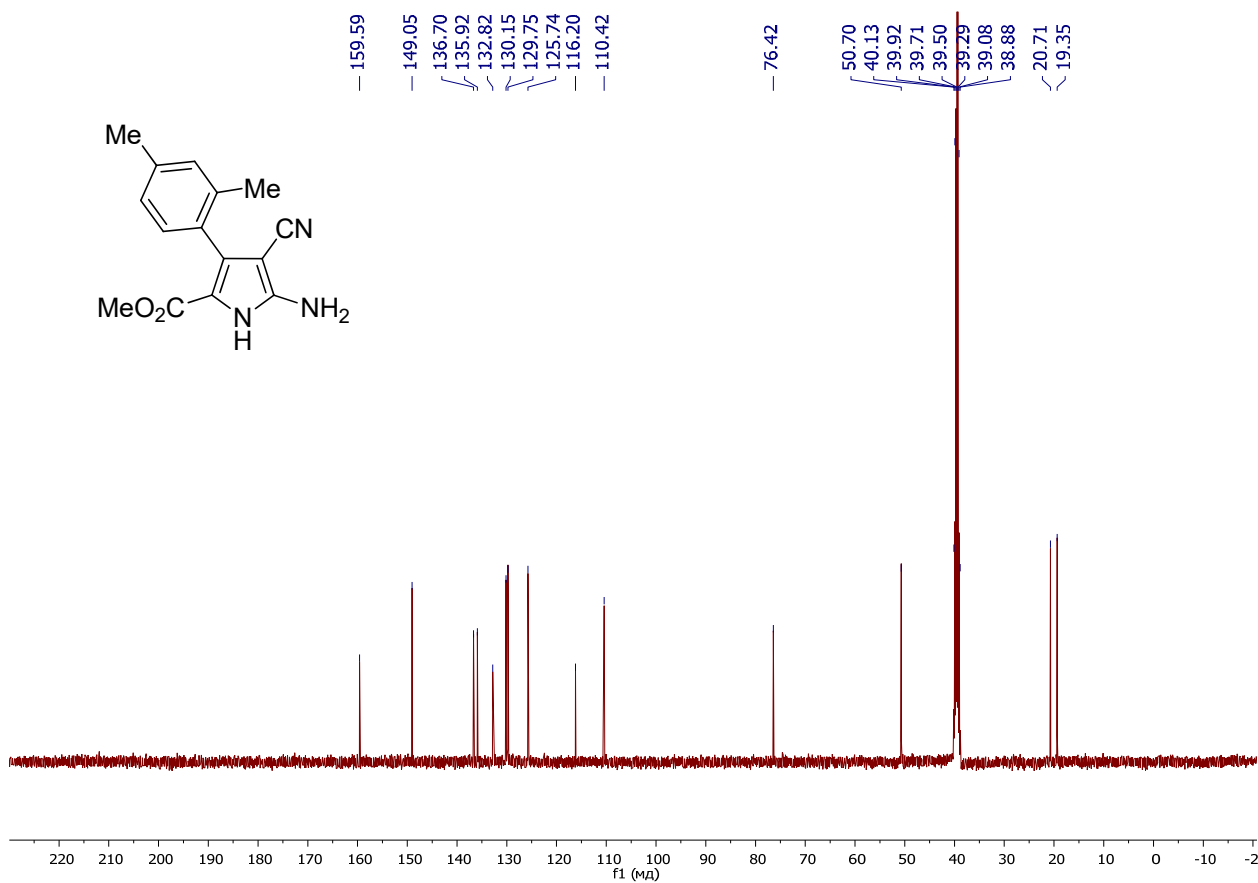

<sup>1</sup>H NMR spectra (DMSO-*d*<sub>6</sub>, 400 MHz) of compound **2h**

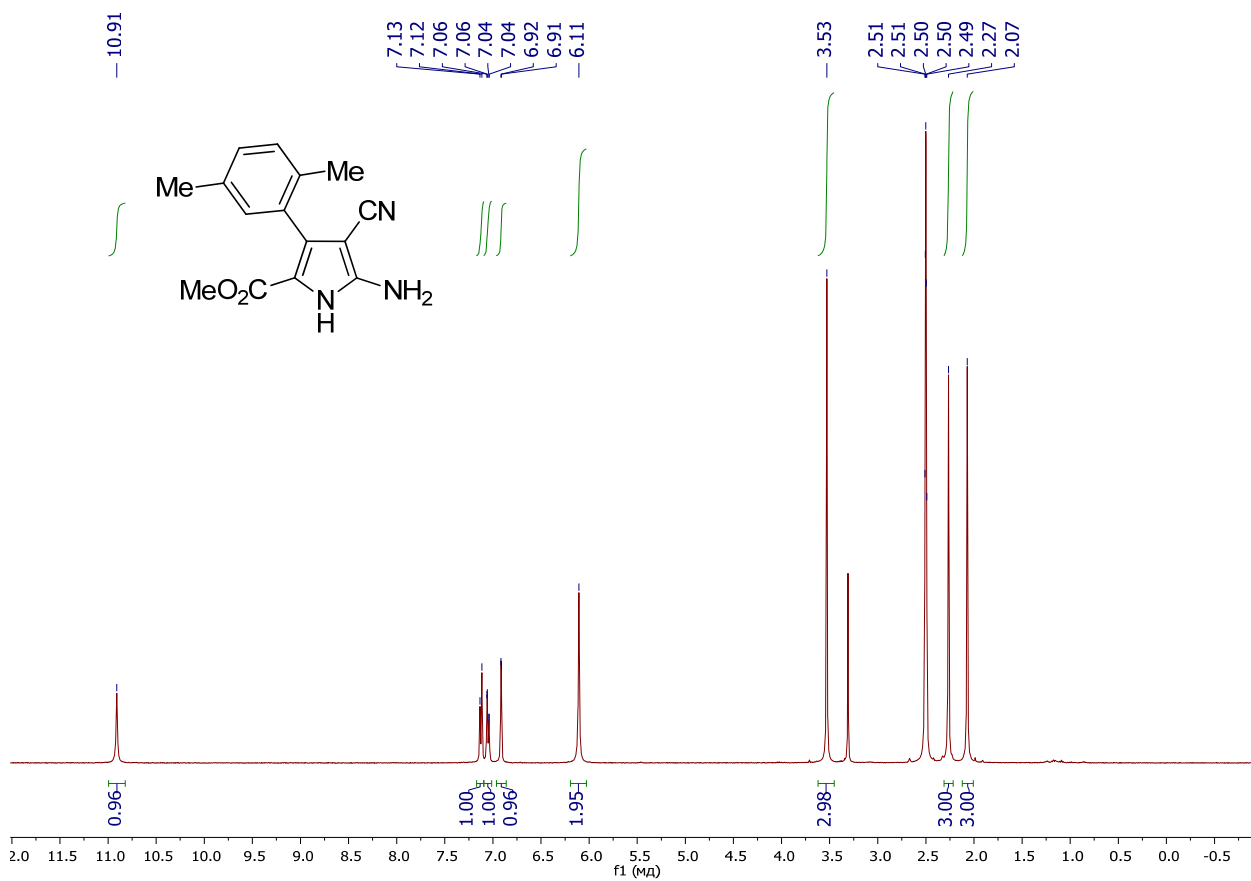

<sup>13</sup>C NMR spectra (DMSO-*d*<sub>6</sub>, 100 MHz) of compound **2h**

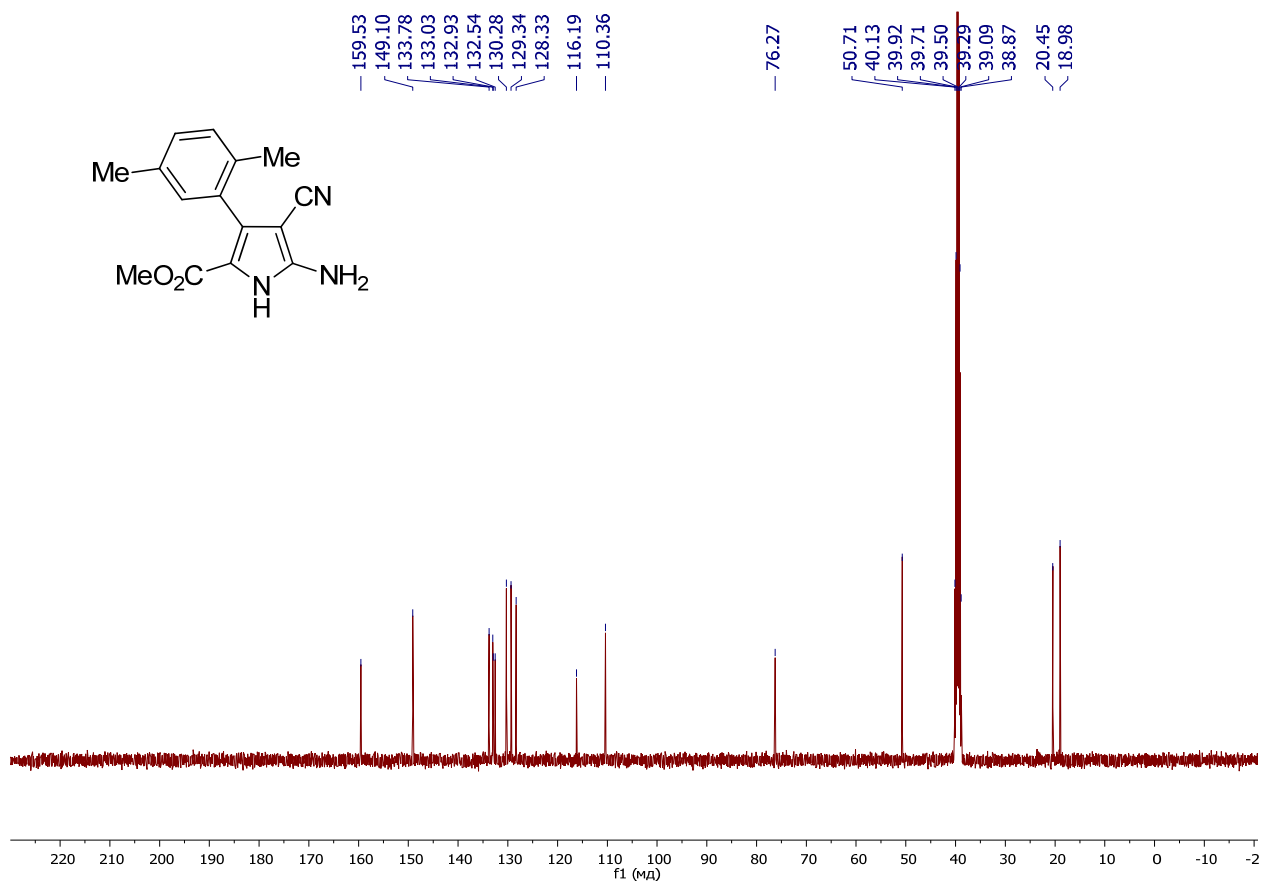

$^1\text{H}$  NMR spectra (DMSO- $d_6$ , 400 MHz) of compound **2i**

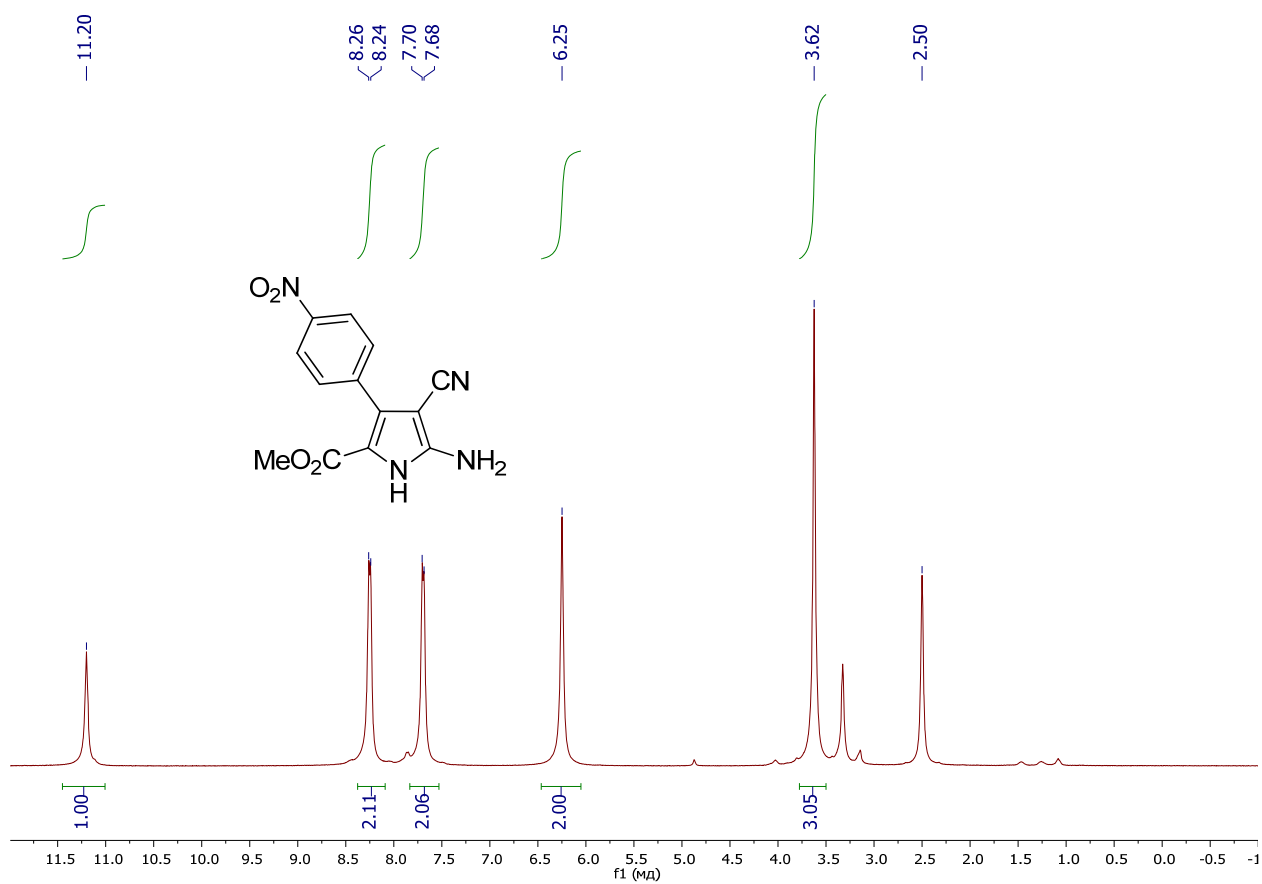

$^{13}\text{C}$  NMR spectra (DMSO- $d_6$ , 100 MHz) of compound **2i**

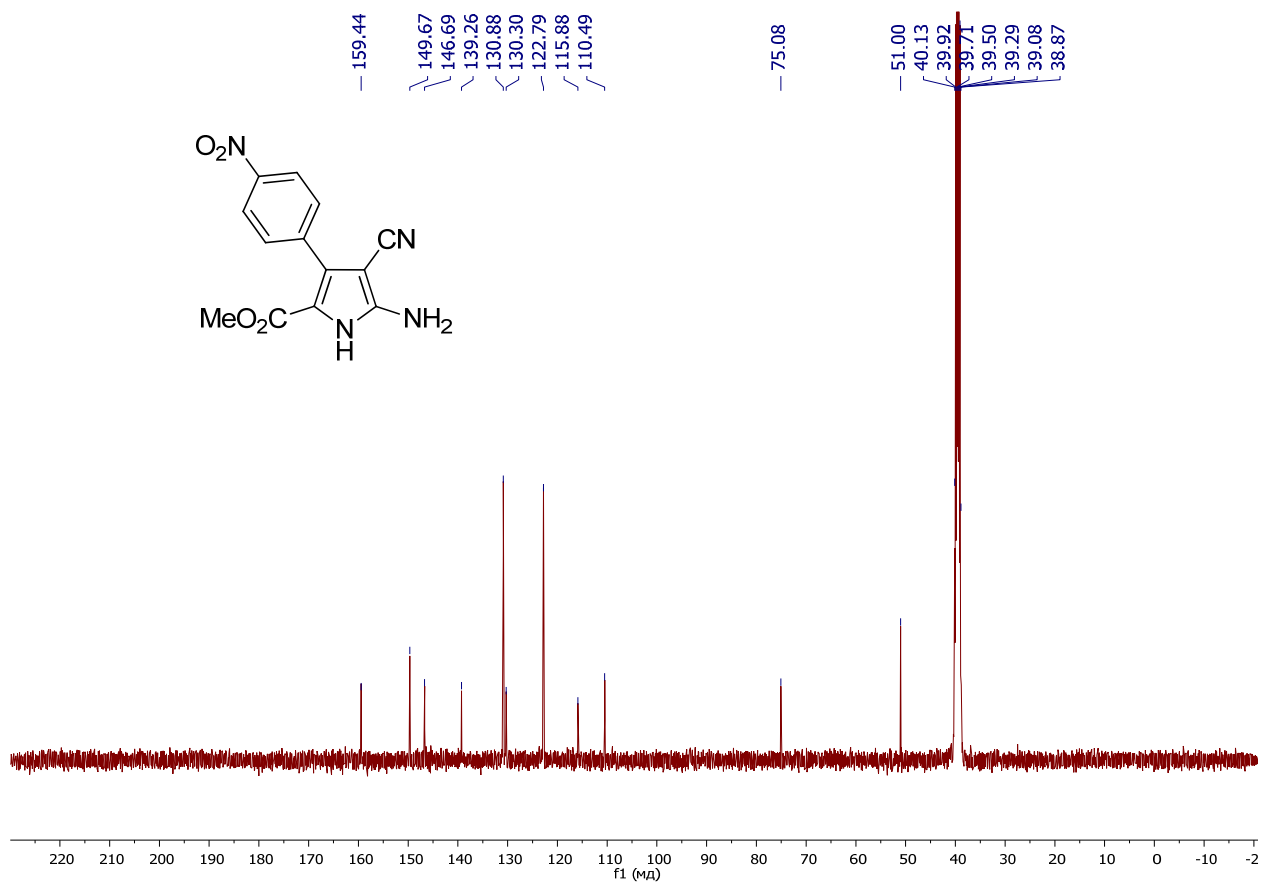



$^1\text{H}$  NMR spectra (DMSO- $d_6$ , 400 MHz) of compound **2j**

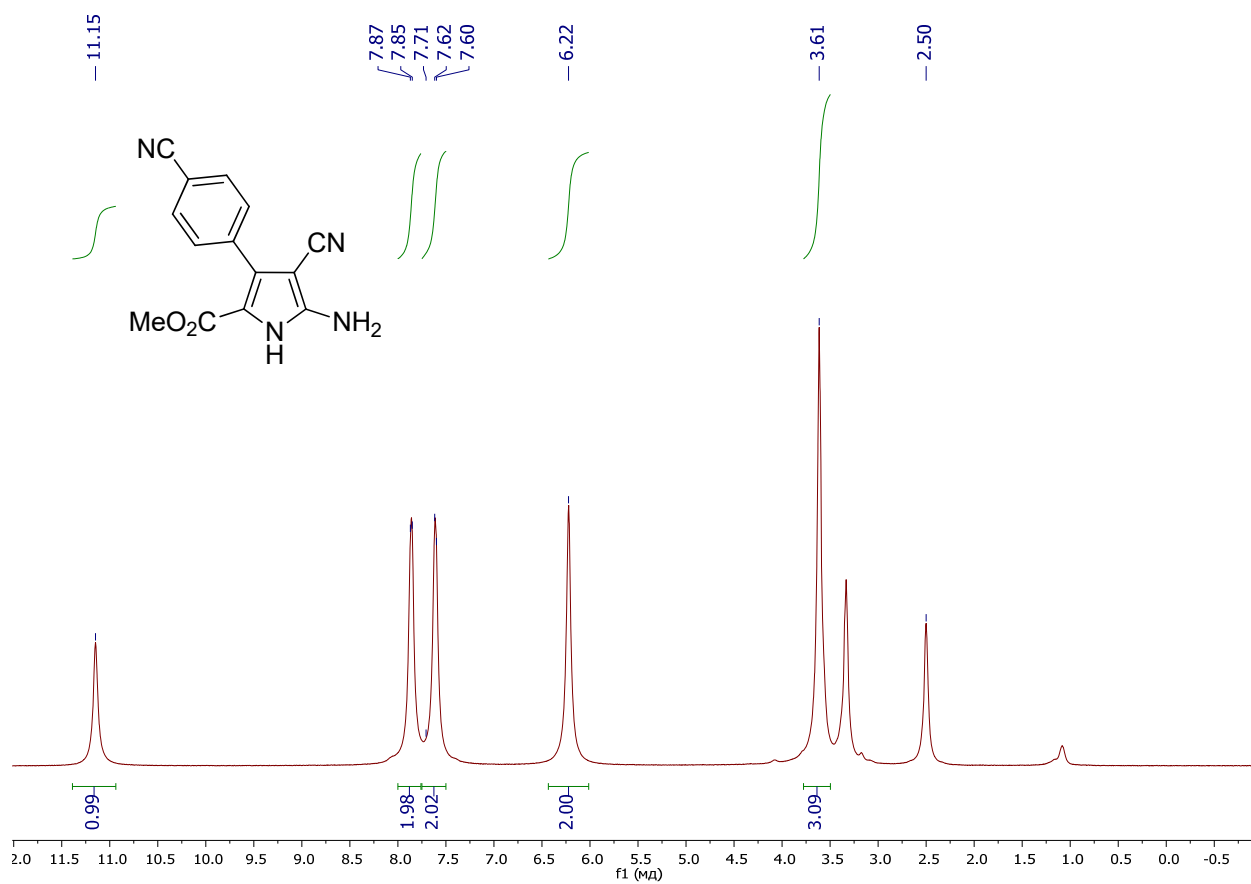

$^{13}\text{C}$  NMR spectra (DMSO- $d_6$ , 100 MHz) of compound **2j**

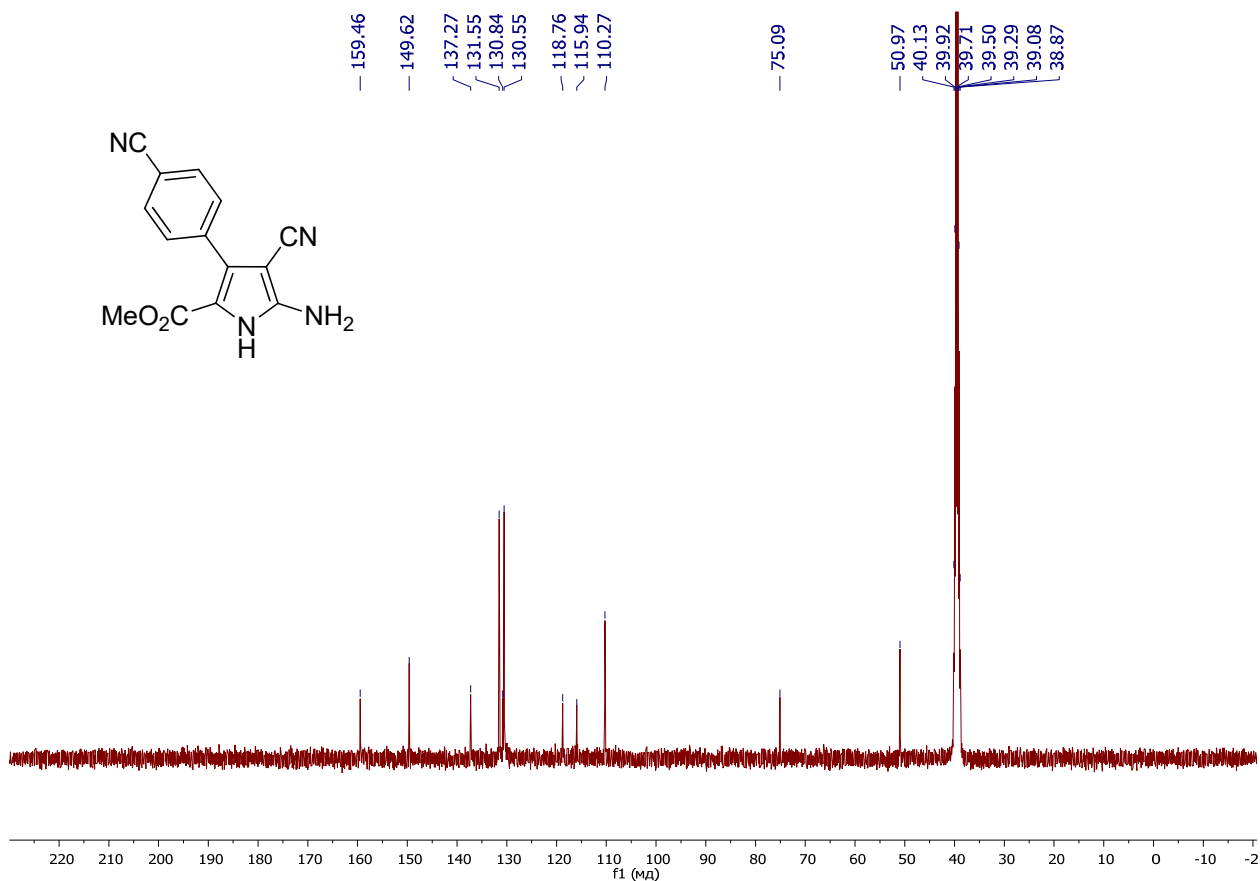

<sup>1</sup>H NMR spectra (DMSO-*d*<sub>6</sub>, 400 MHz) of compound **2k**

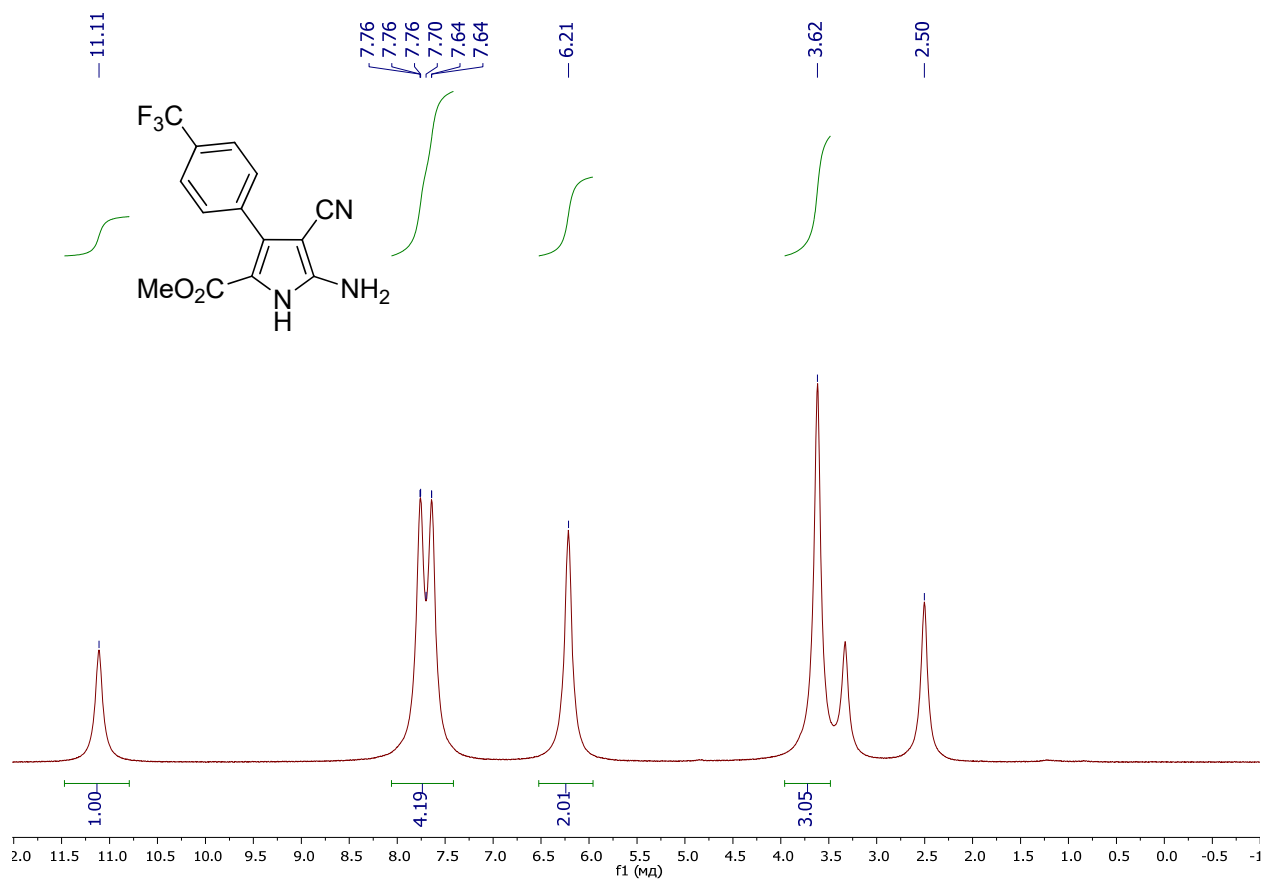

<sup>13</sup>C NMR spectra (DMSO-*d*<sub>6</sub>, 100 MHz) of compound **2k**

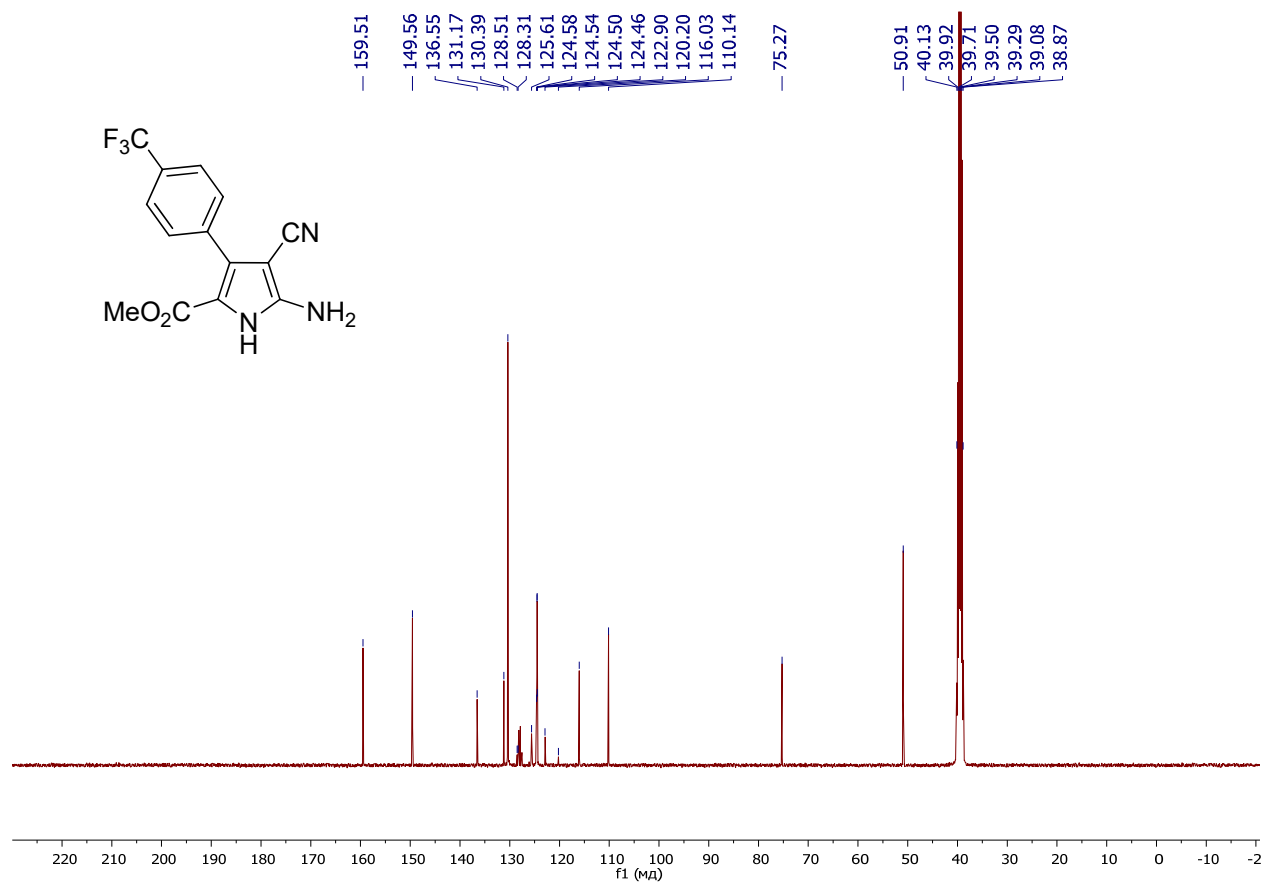

$^1\text{H}$  NMR spectra (DMSO- $d_6$ , 400 MHz) of compound **21**

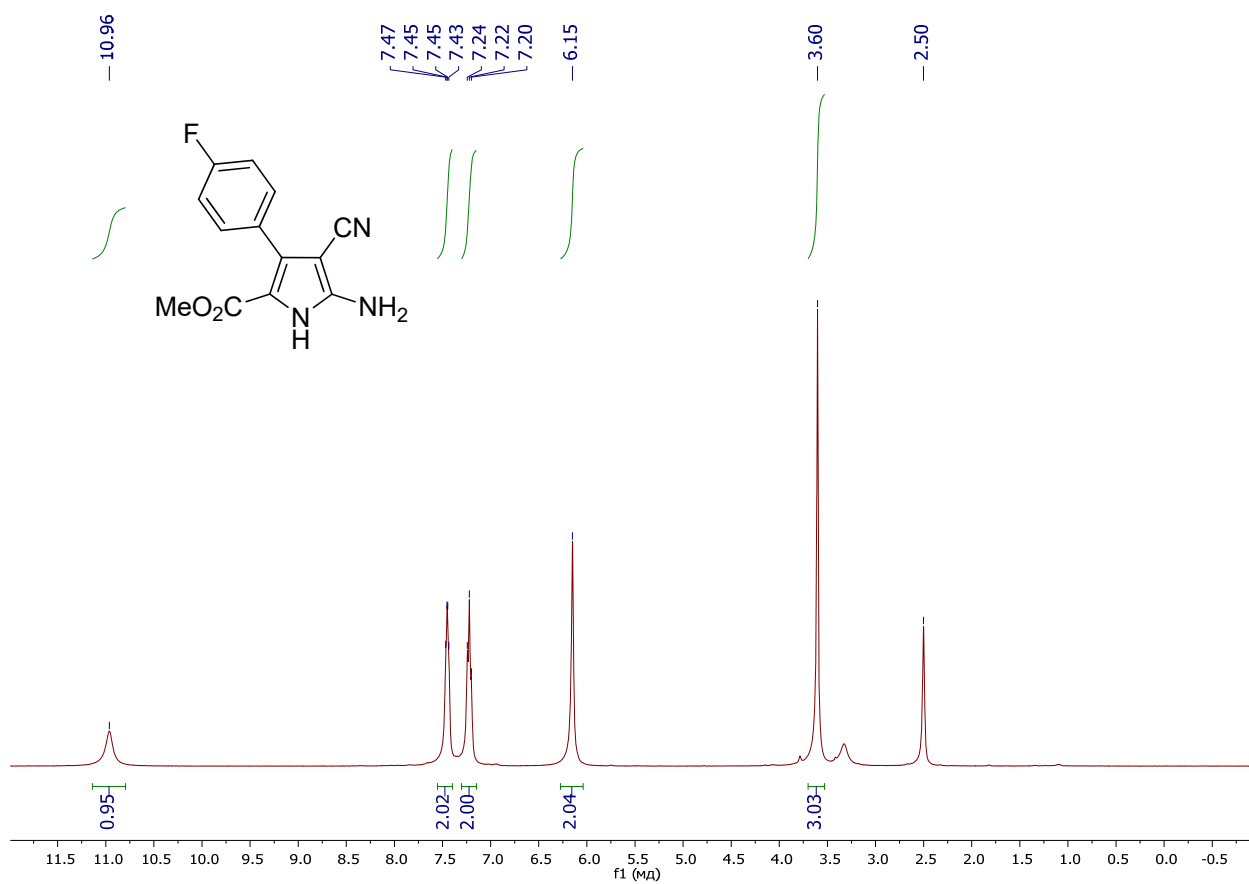

$^{13}\text{C}$  NMR spectra (DMSO- $d_6$ , 100 MHz) of compound **21**

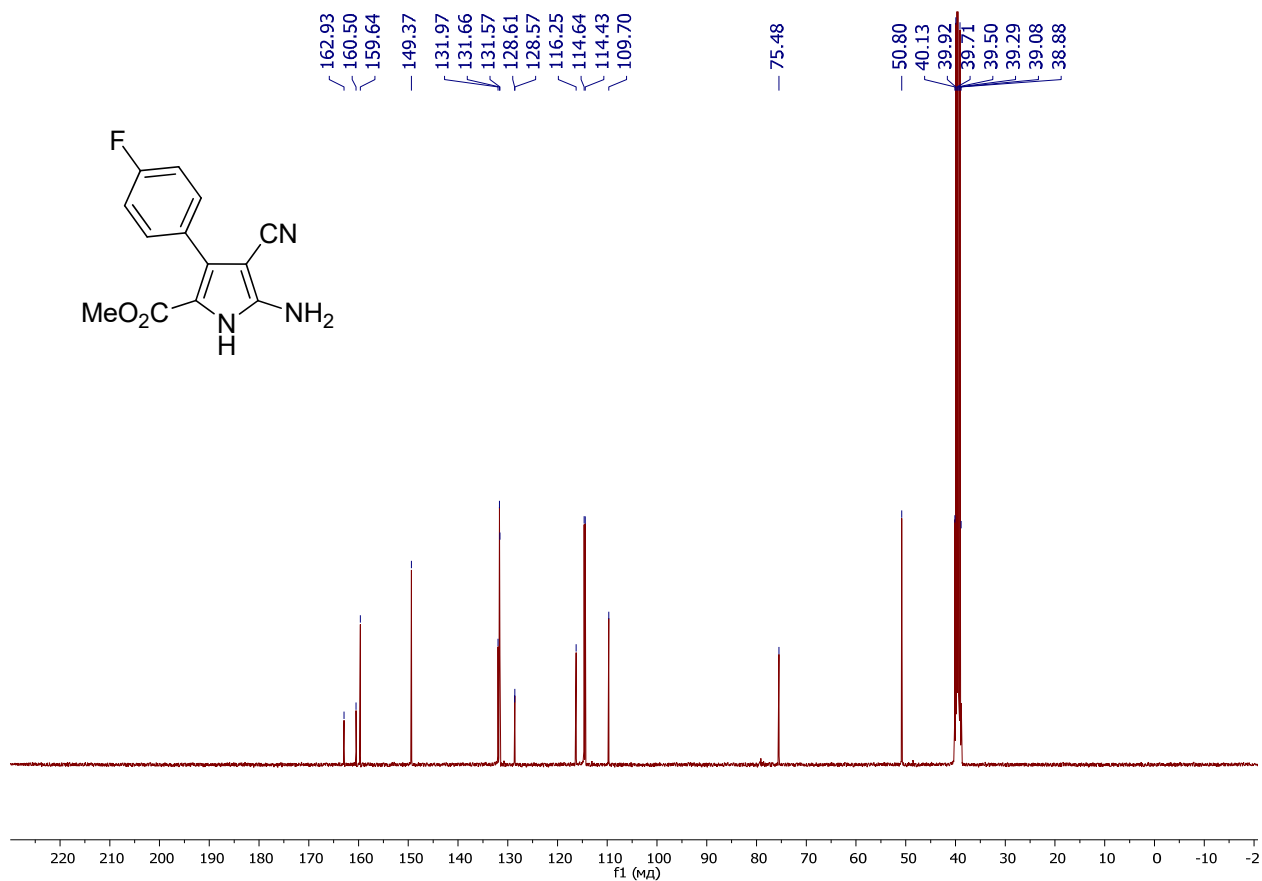

$^1\text{H}$  NMR spectra (DMSO- $d_6$ , 400 MHz) of compound **2m**

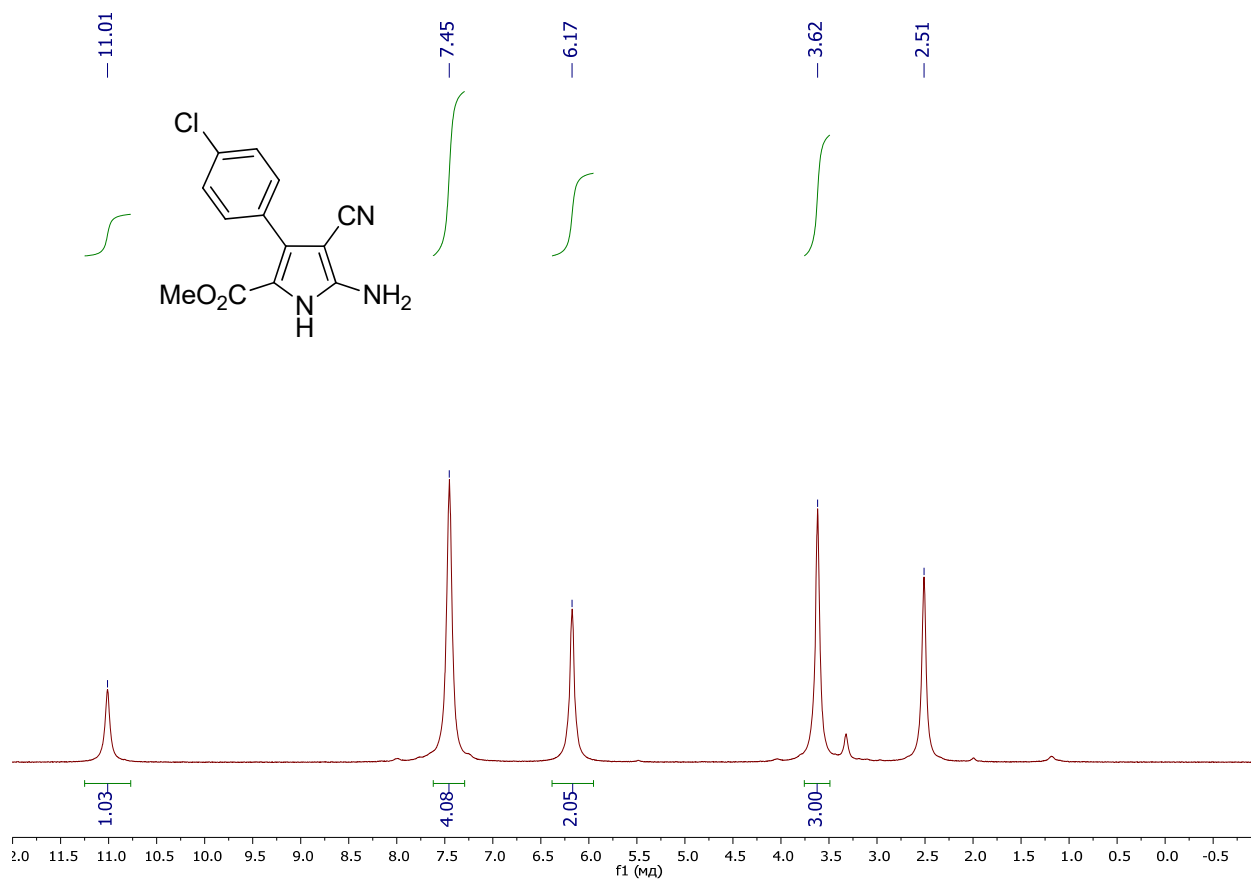

$^{13}\text{C}$  NMR spectra (DMSO- $d_6$ , 100 MHz) of compound **2m**

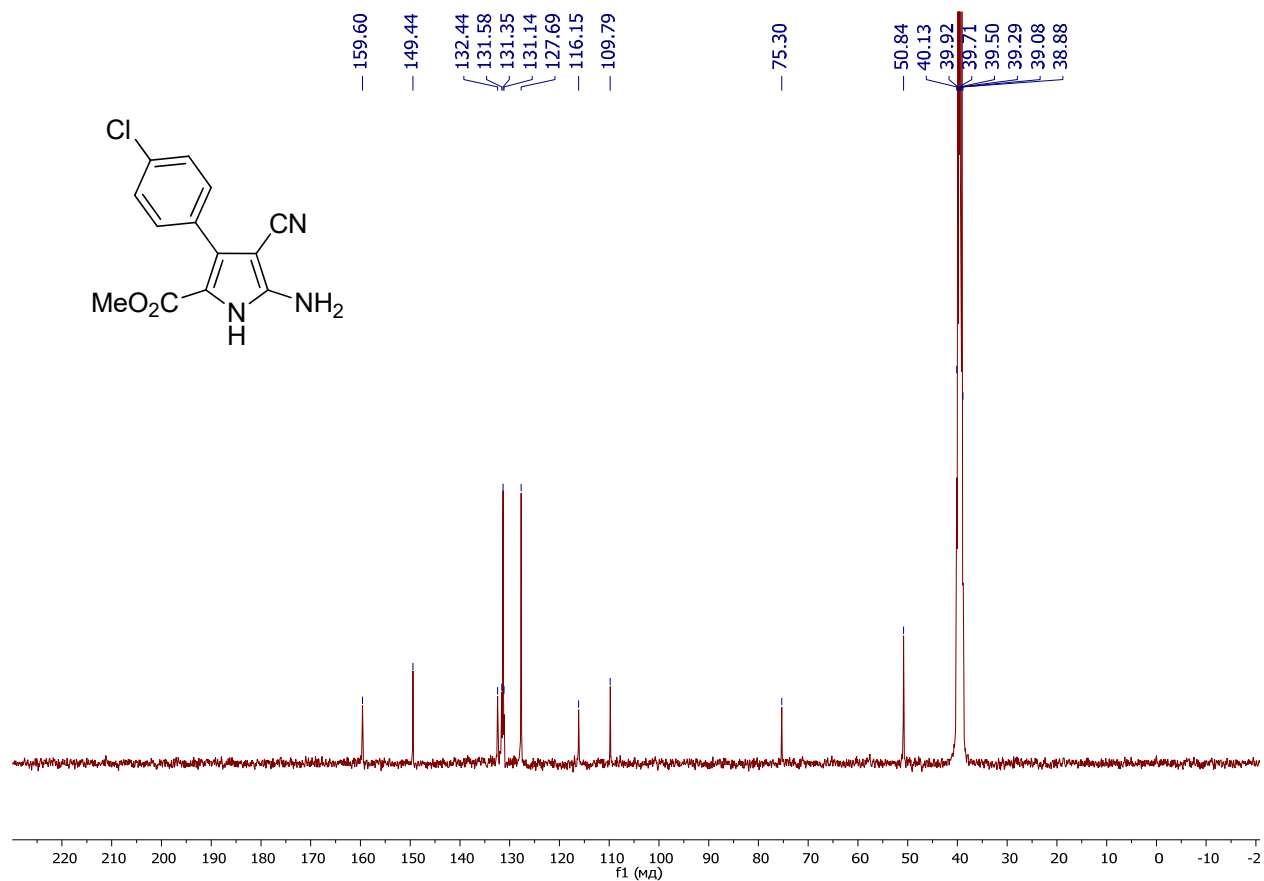

<sup>1</sup>H NMR spectra (DMSO-*d*<sub>6</sub>, 400 MHz) of compound **2n**

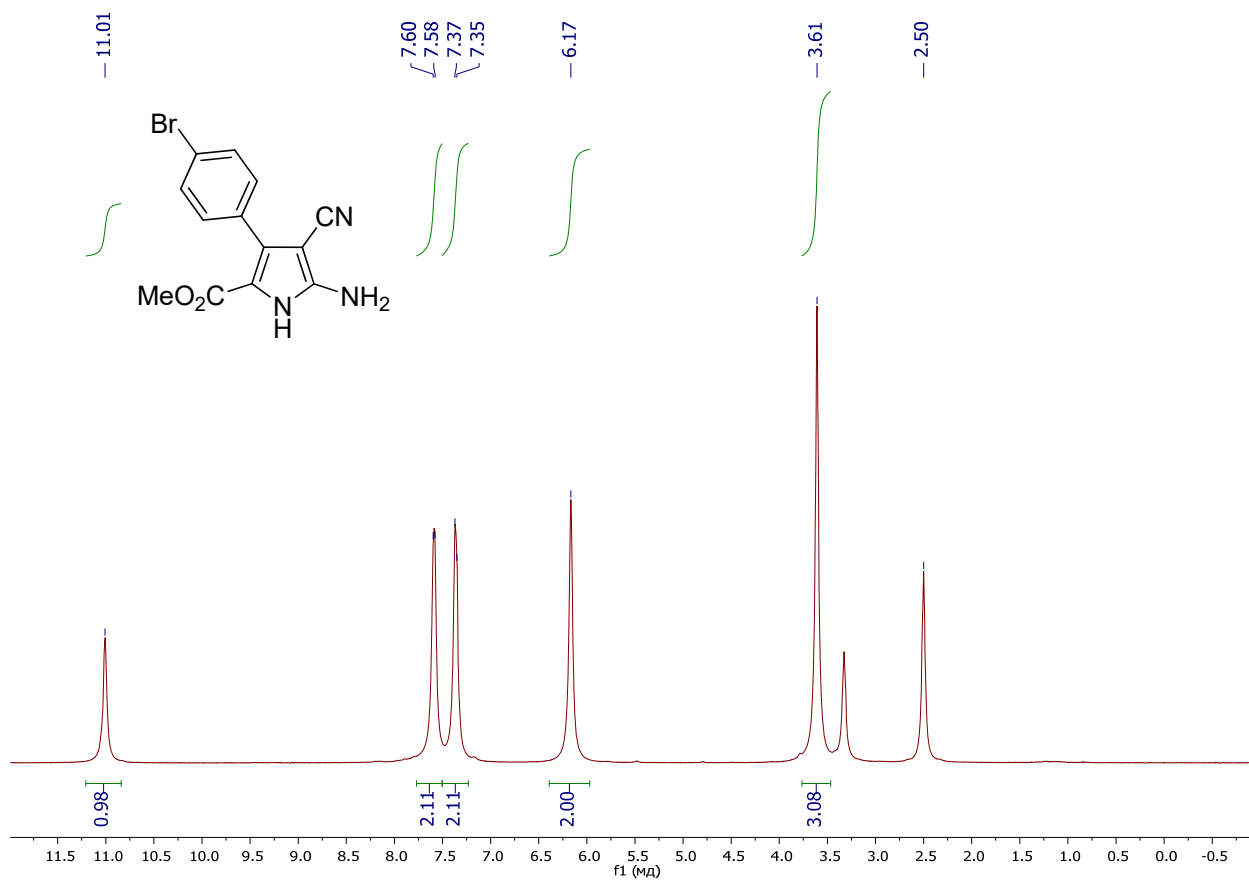

<sup>13</sup>C NMR spectra (DMSO-*d*<sub>6</sub>, 100 MHz) of compound **2n**

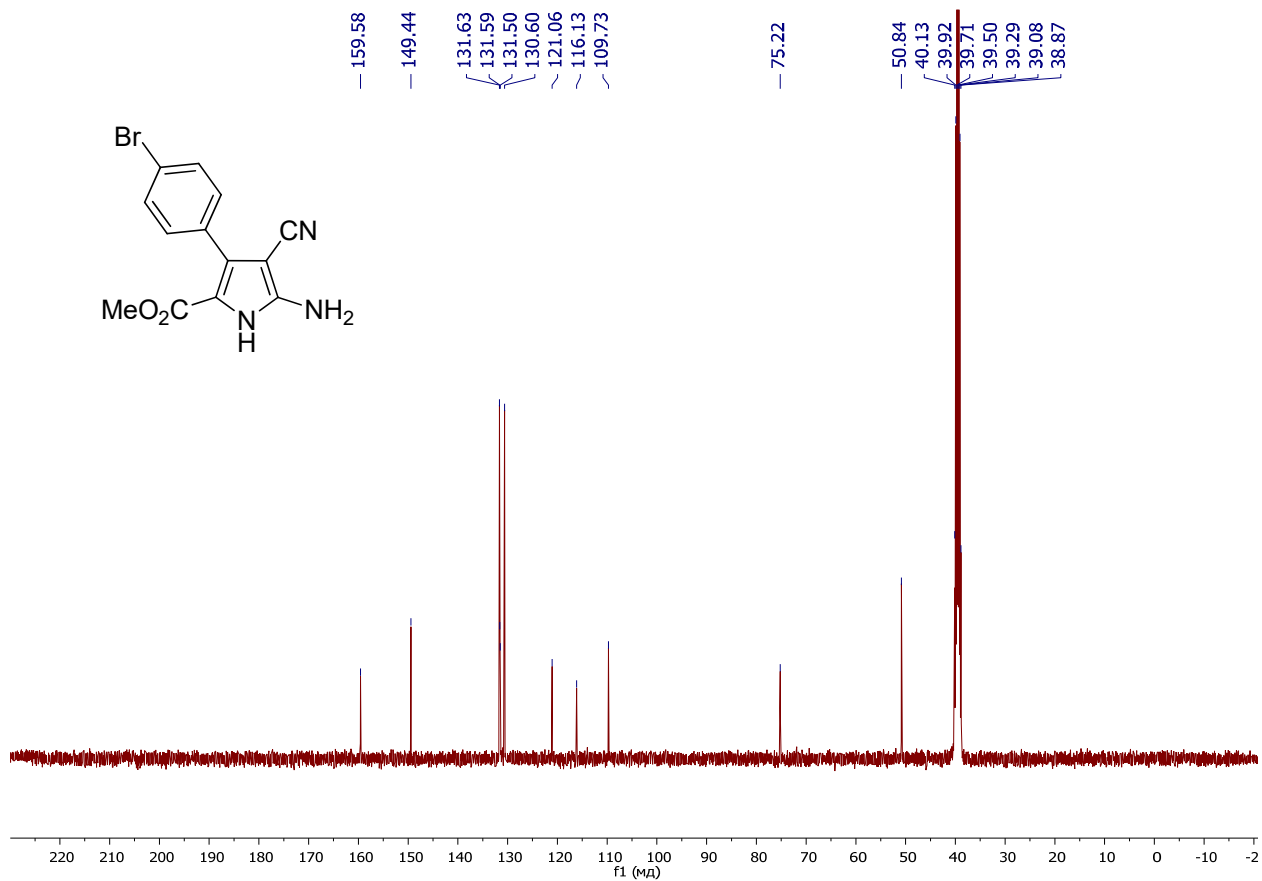

<sup>1</sup>H NMR spectra (DMSO-*d*<sub>6</sub>, 400 MHz) of compound **2o**

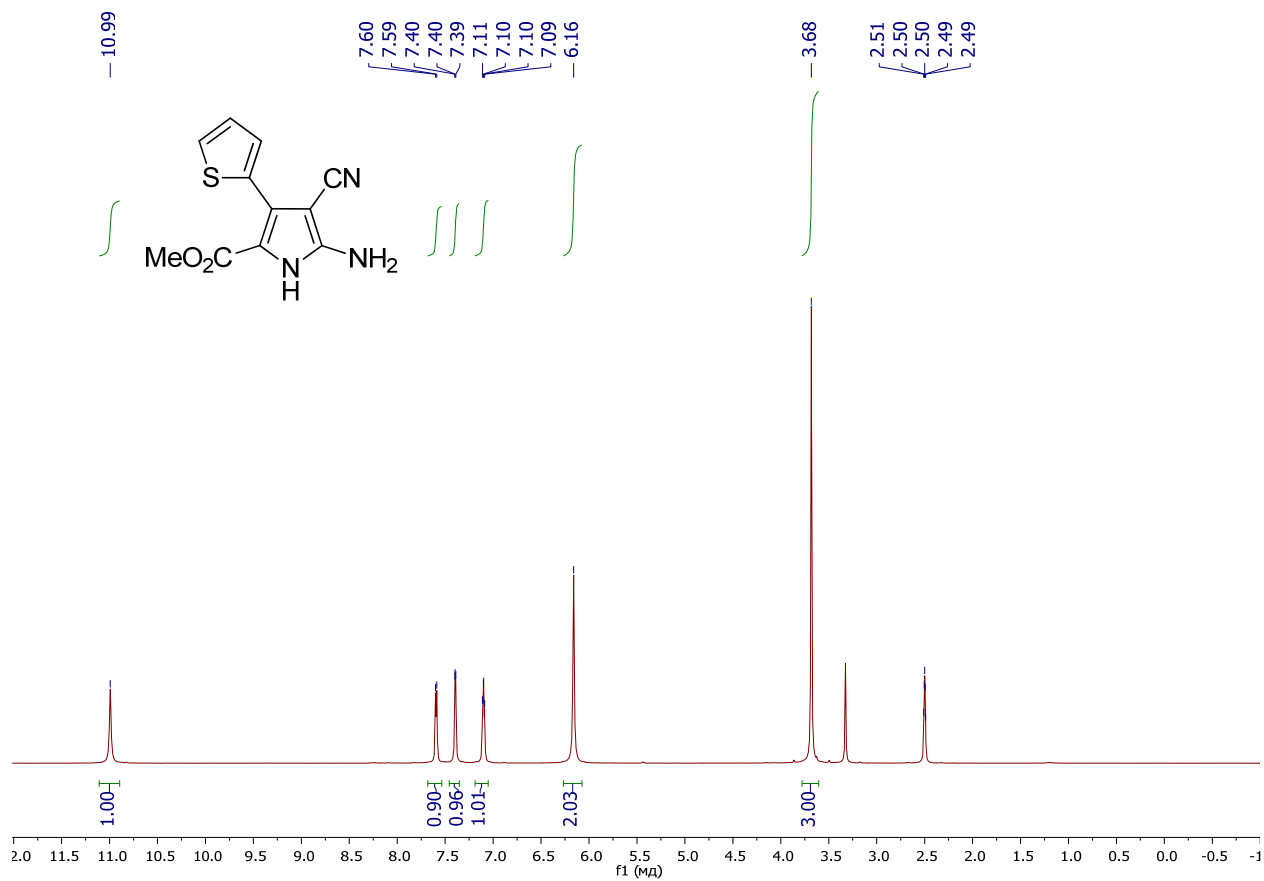

<sup>13</sup>C NMR spectra (DMSO-*d*<sub>6</sub>, 100 MHz) of compound **2o**

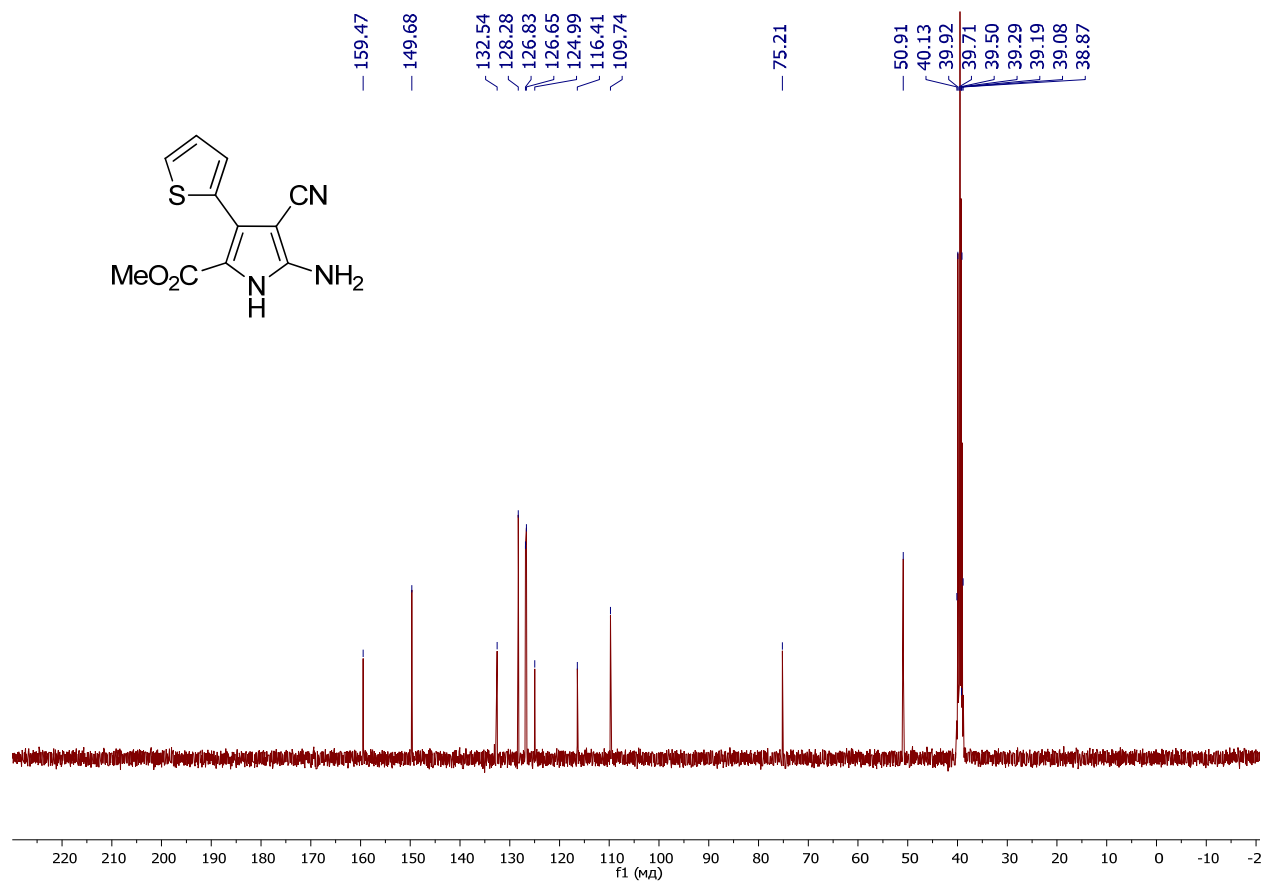

$^1\text{H}$  NMR spectra (DMSO- $d_6$ , 400 MHz) of compound **2p**

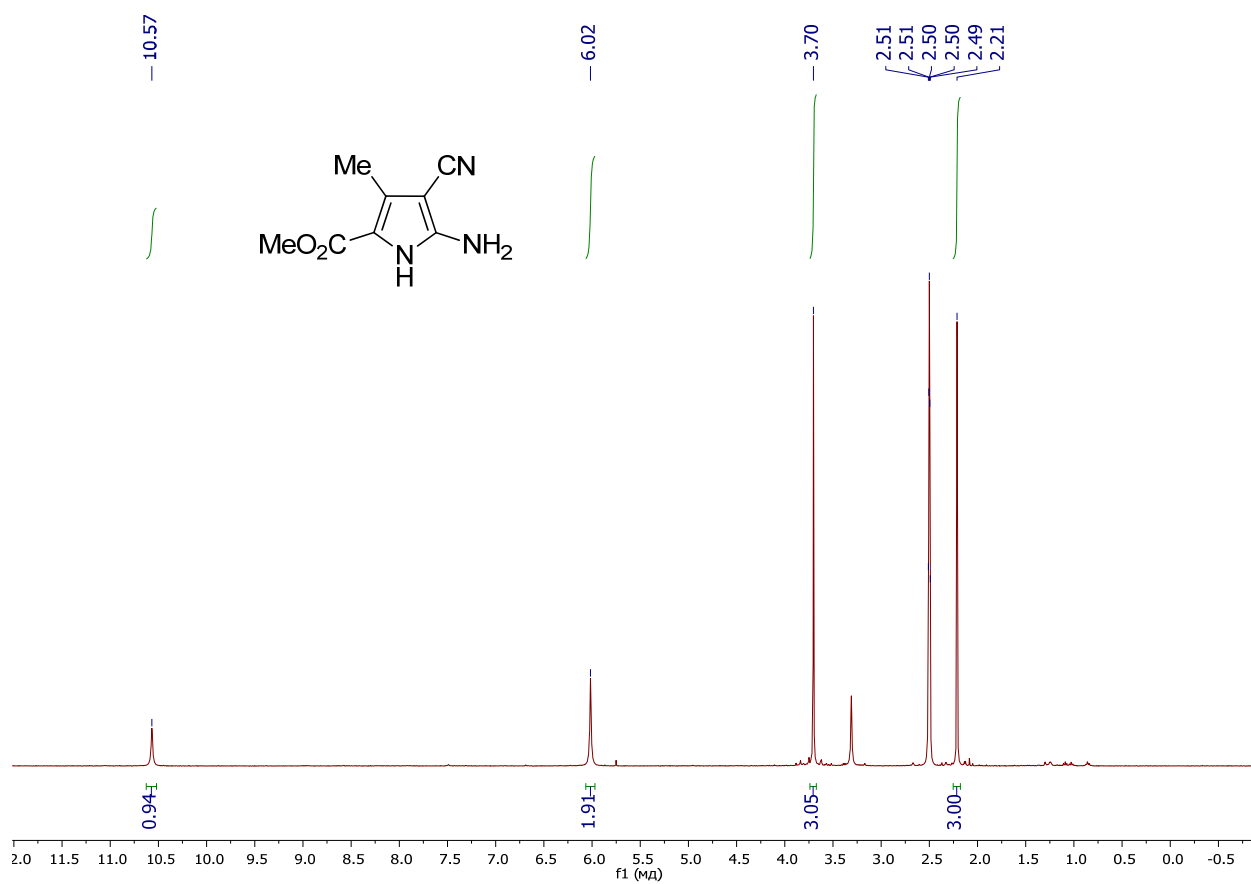

$^{13}\text{C}$  NMR spectra (DMSO- $d_6$ , 100 MHz) of compound **2p**

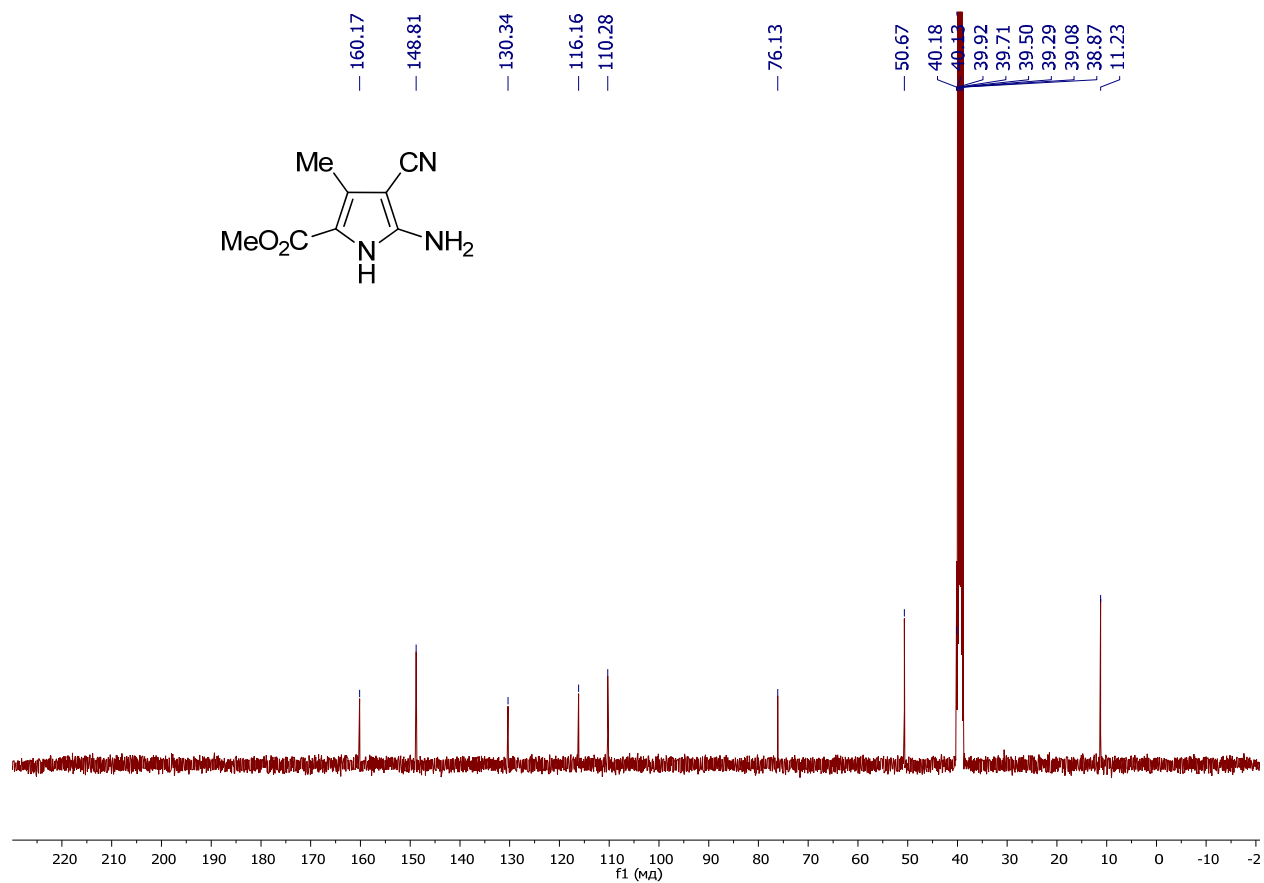

<sup>1</sup>H NMR spectra (DMSO-*d*<sub>6</sub>, 400 MHz) of compound **2q**

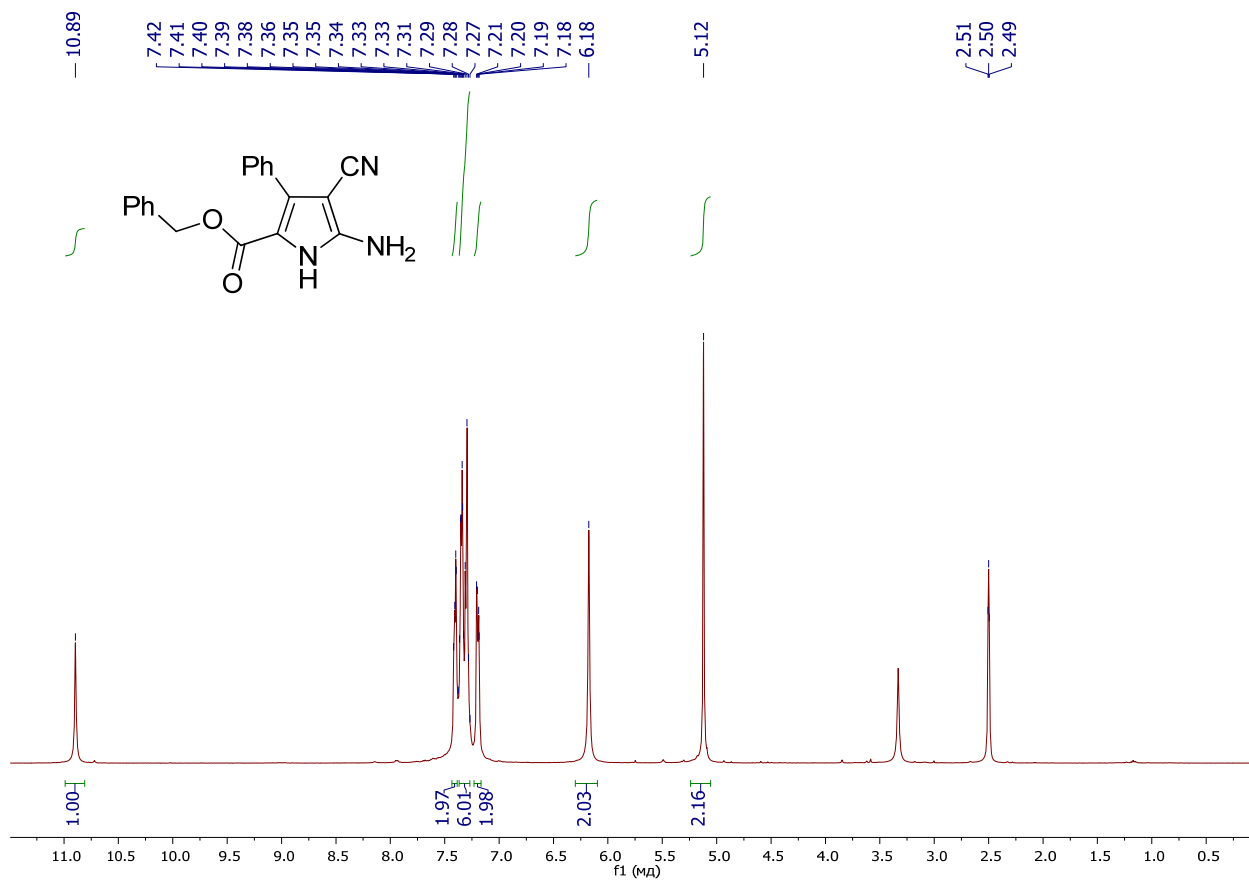

<sup>13</sup>C NMR spectra (DMSO-*d*<sub>6</sub>, 100 MHz) of compound **2q**

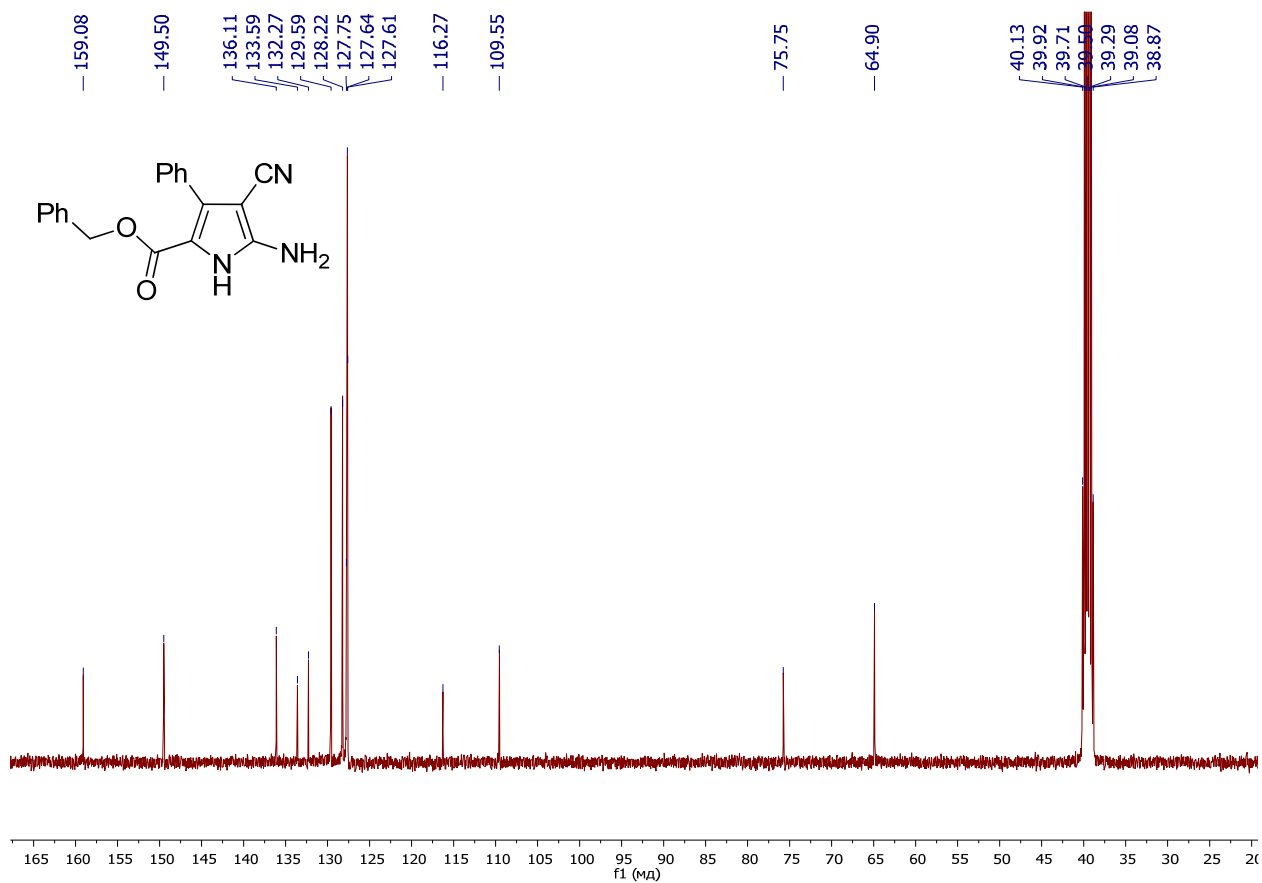



$^1\text{H}$  NMR spectra (DMSO- $d_6$ , 400 MHz) of compound **2r**

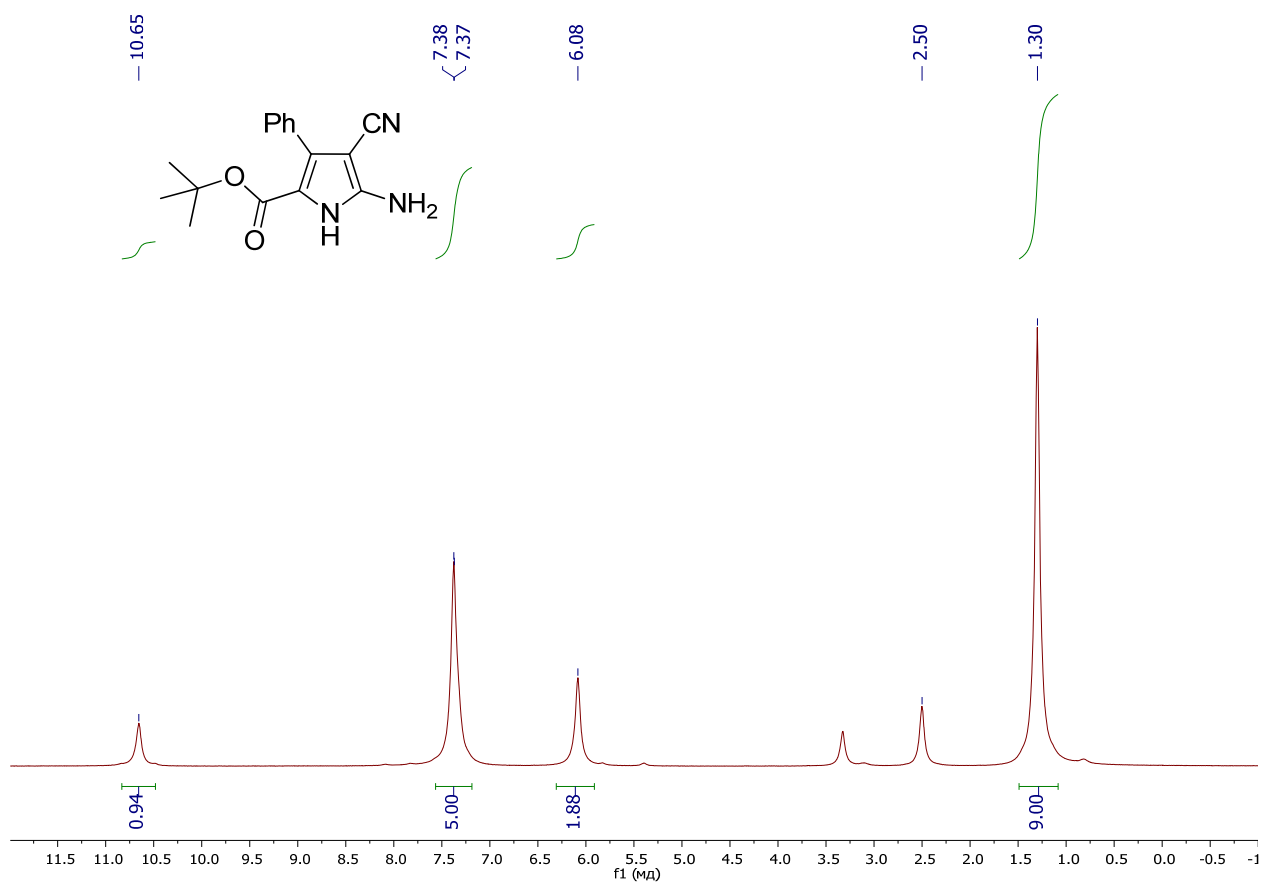

$^{13}\text{C}$  NMR spectra (DMSO- $d_6$ , 100 MHz) of compound **2r**

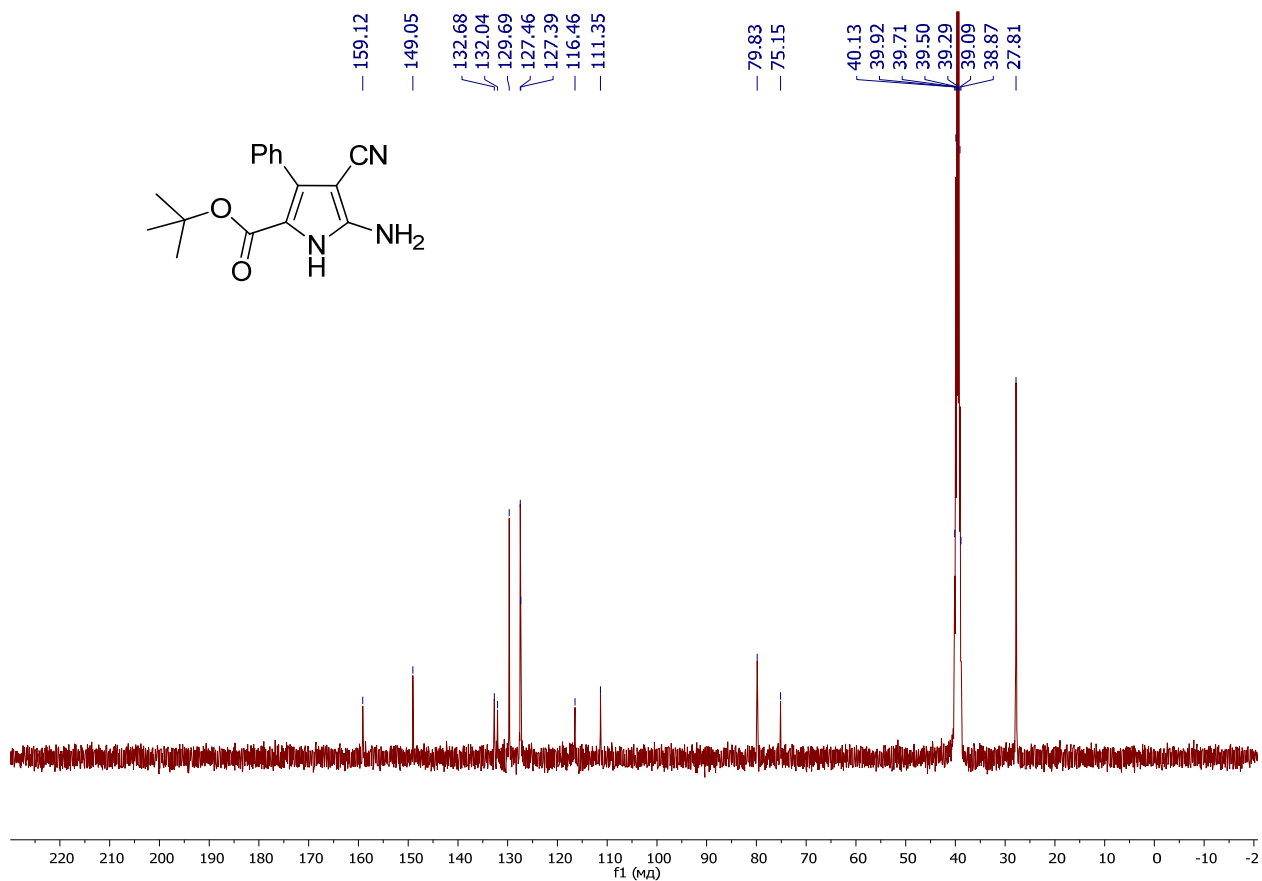

<sup>1</sup>H NMR spectra (DMSO-*d*<sub>6</sub>, 400 MHz) of compound **2s**

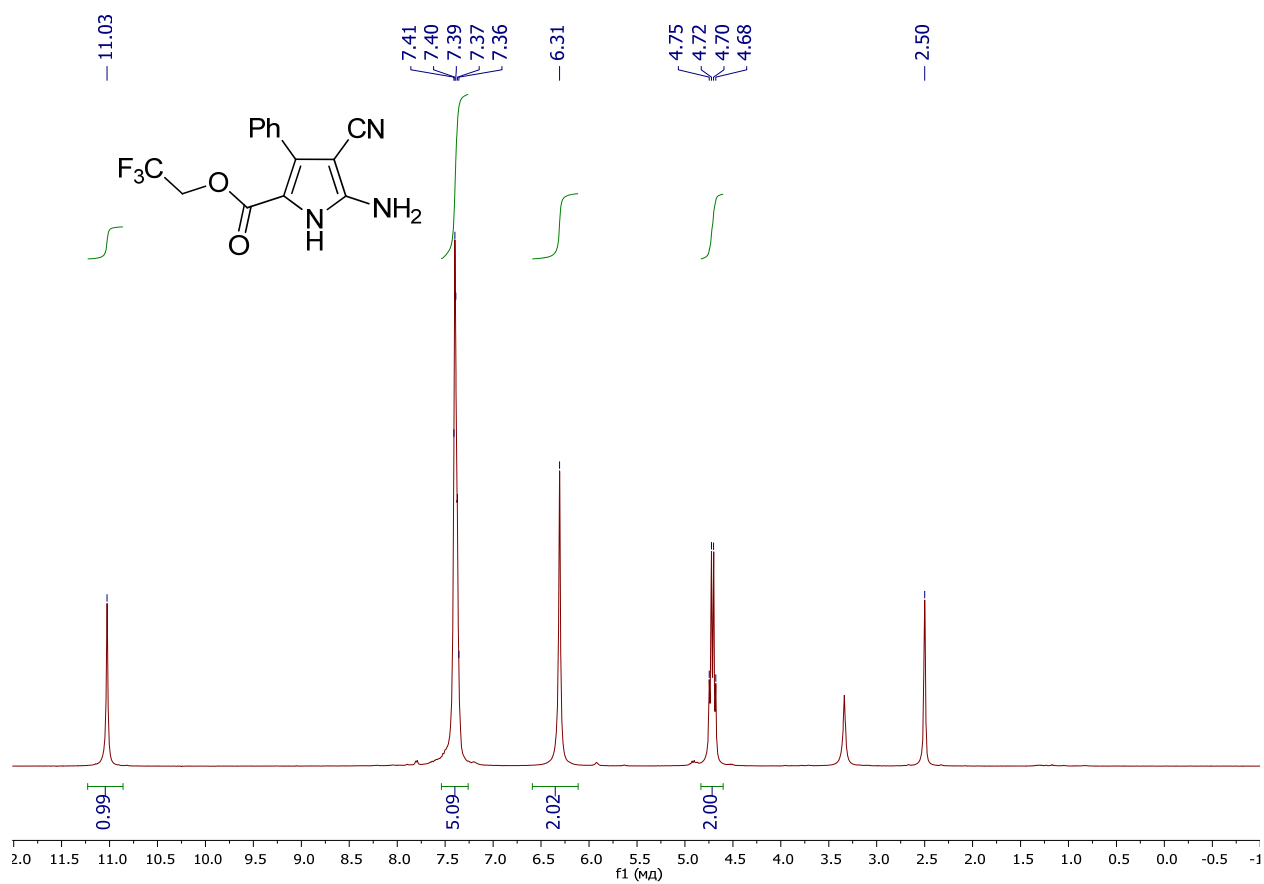

<sup>13</sup>C NMR spectra (DMSO-*d*<sub>6</sub>, 100 MHz) of compound **2s**

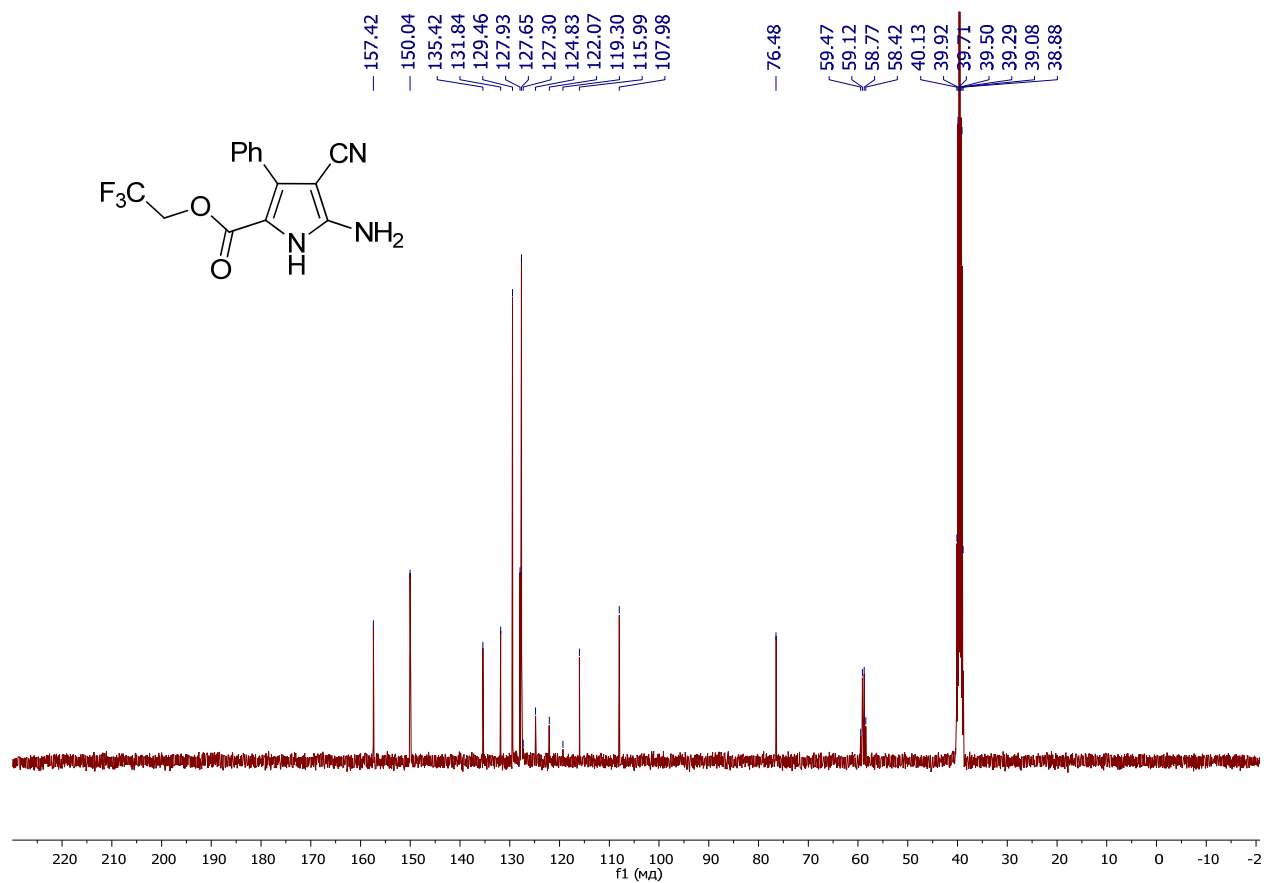

$^1\text{H}$  NMR spectra (DMSO- $d_6$ , 400 MHz) of compound **2t**

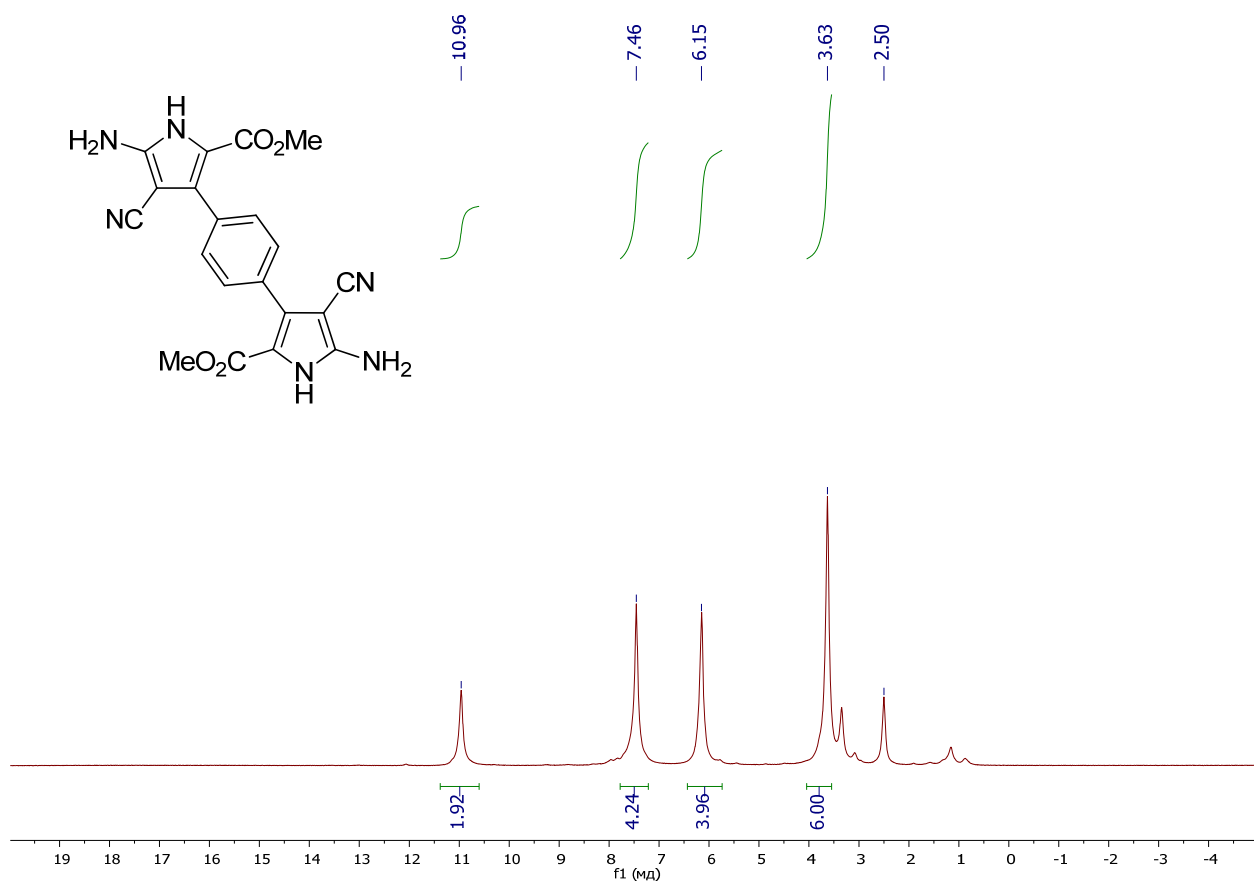

$^{13}\text{C}$  NMR spectra (DMSO- $d_6$ , 100 MHz) of compound **2t**

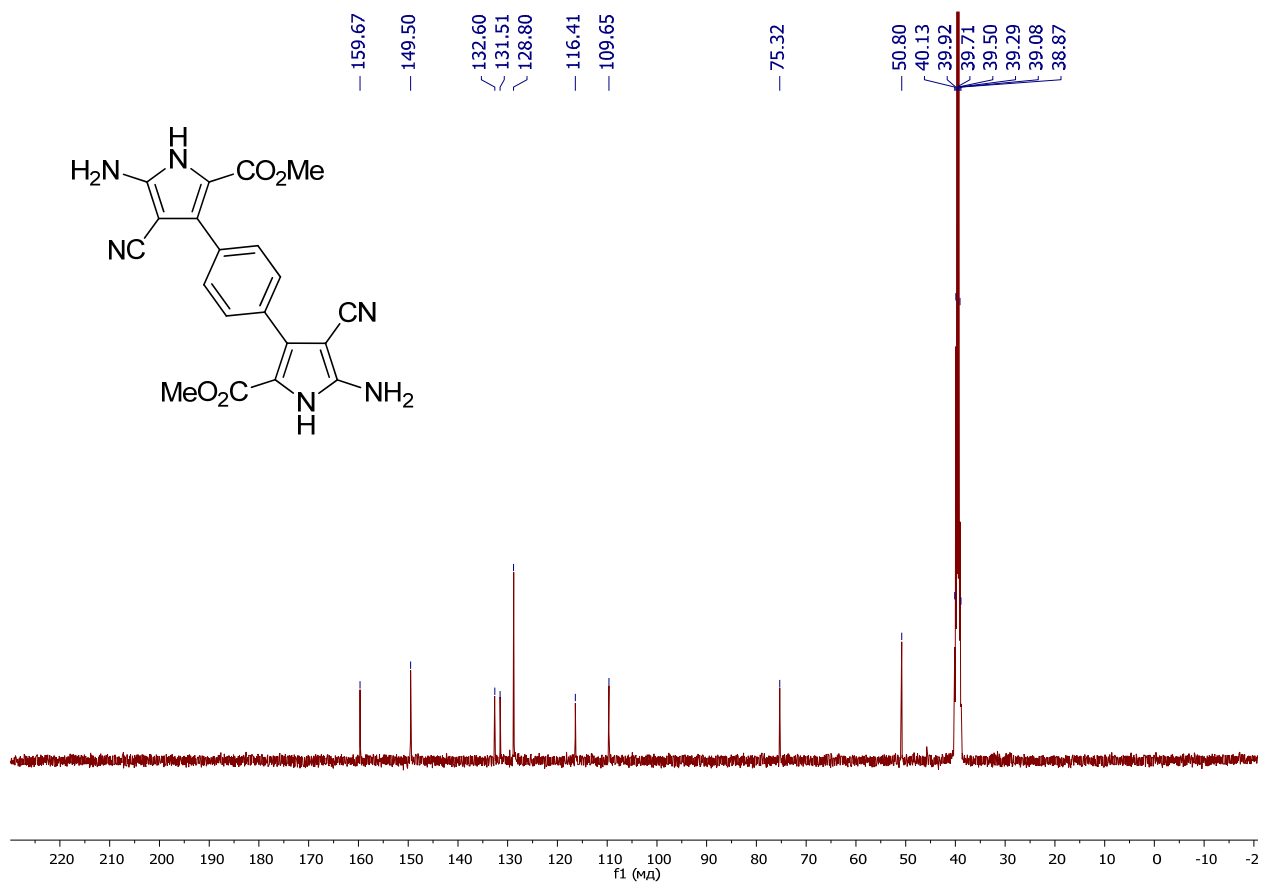

$^1\text{H}$  NMR spectra (DMSO- $d_6$ , 400 MHz) of compound **10a**

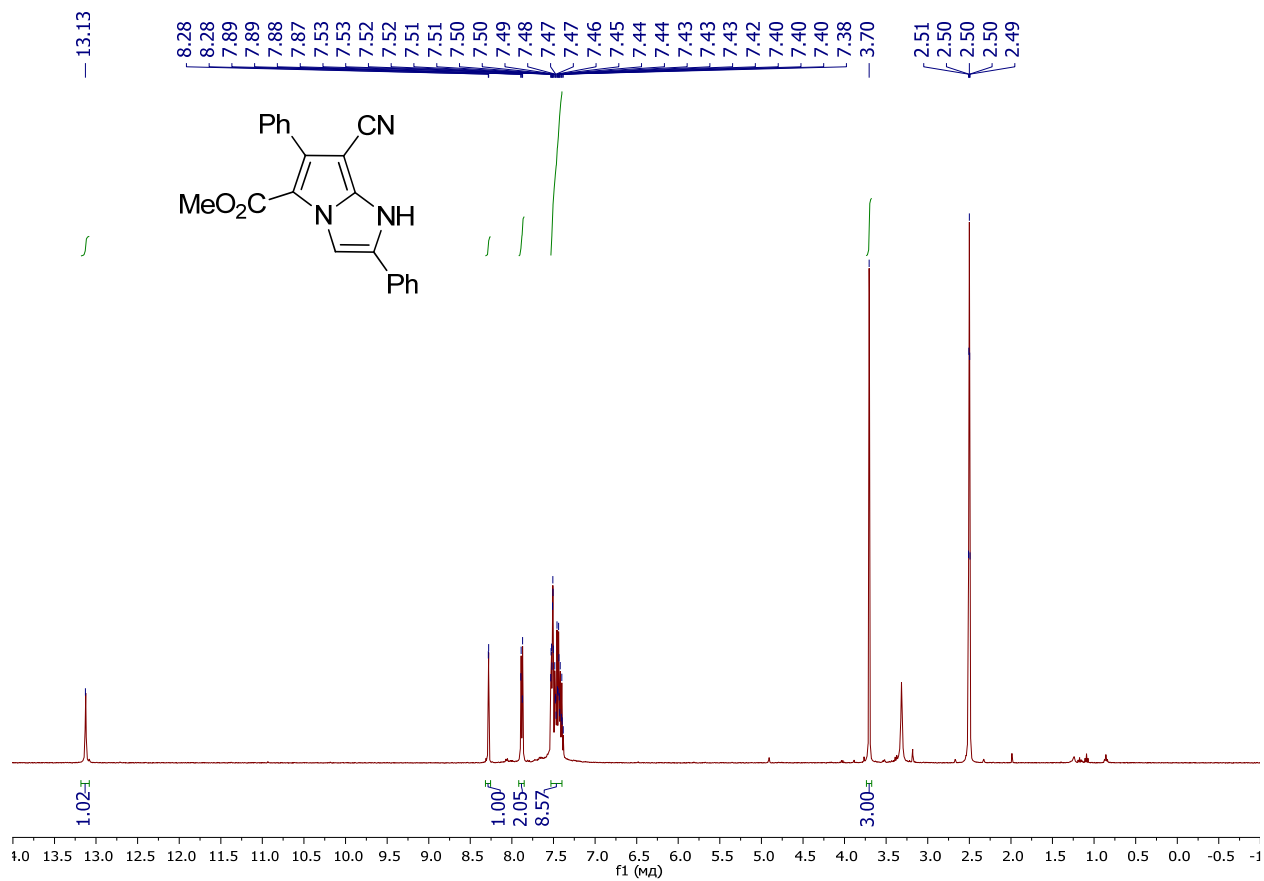

$^{13}\text{C}$  NMR spectra (DMSO- $d_6$ , 100 MHz) of compound **10a**

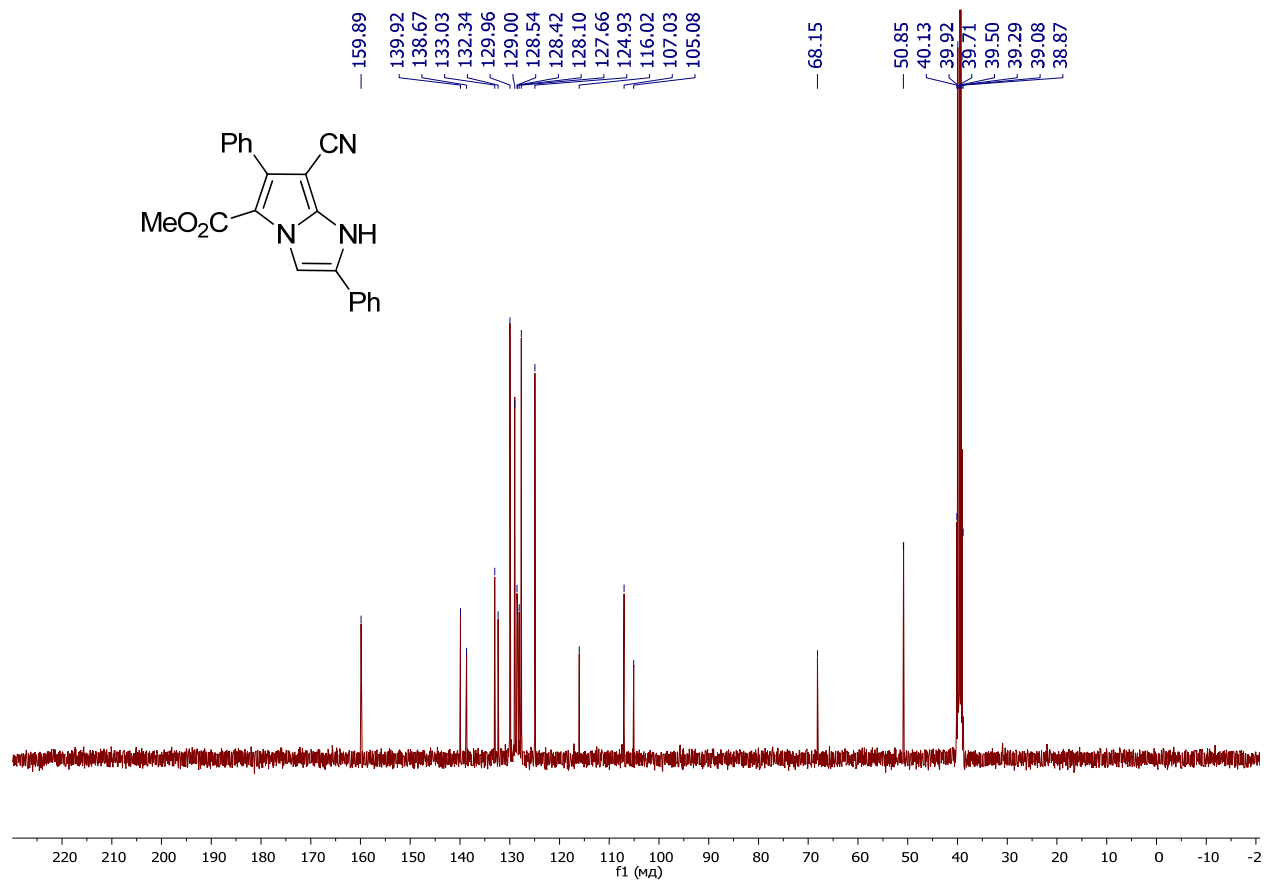

NOESY spectra (DMSO-*d*<sub>6</sub>, 400 MHz) of compound **10a**

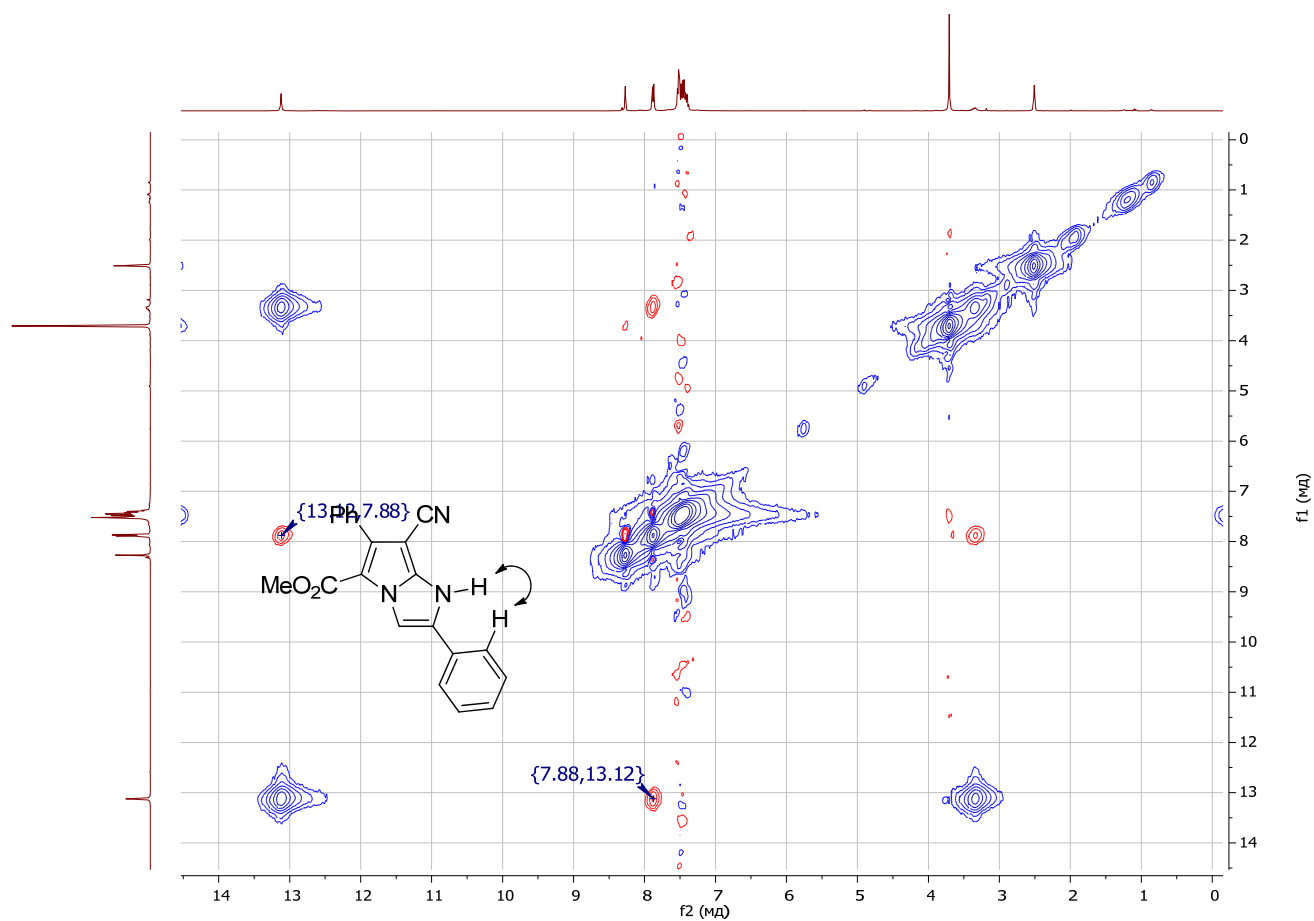

<sup>1</sup>H NMR spectra (DMSO-*d*<sub>6</sub>, 400 MHz) of compound **10b**

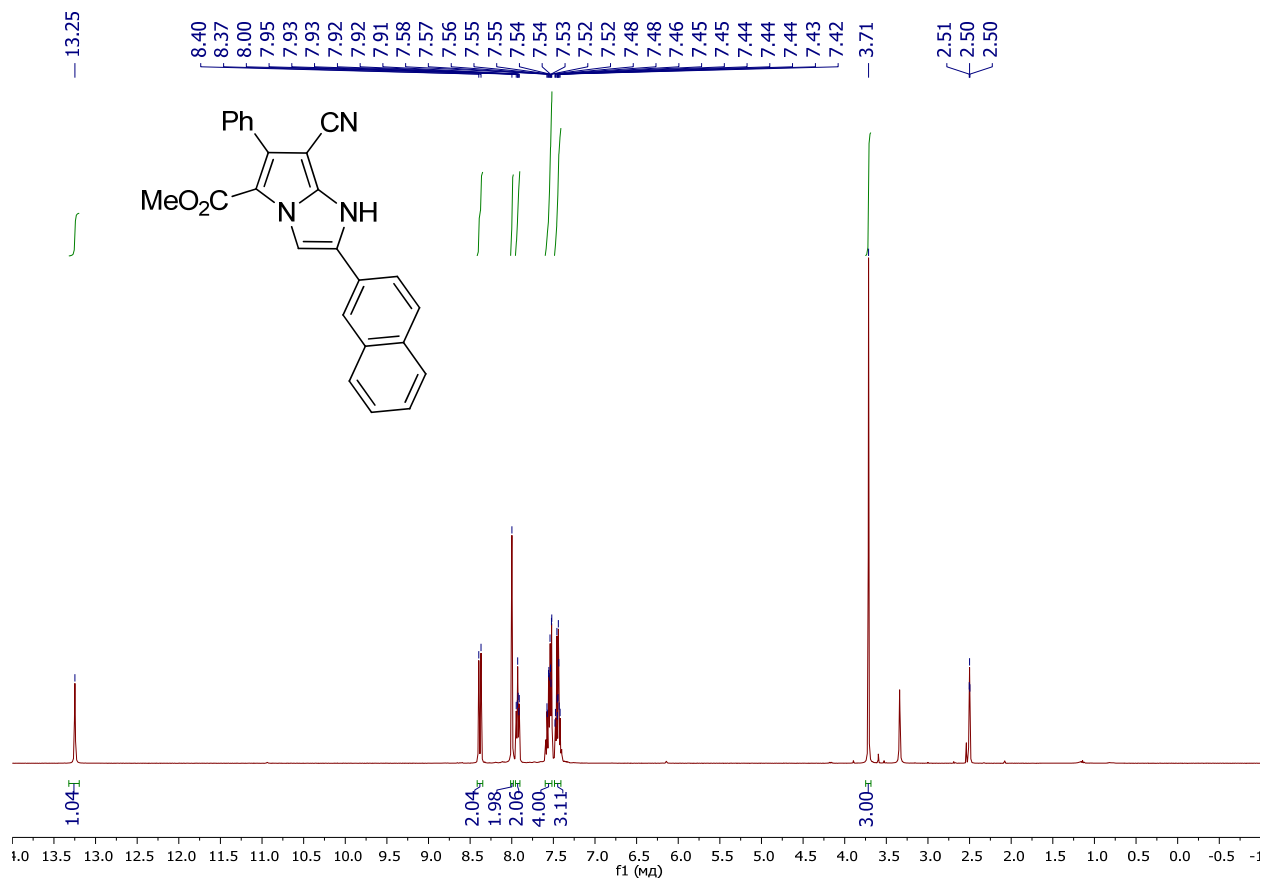

<sup>13</sup>C NMR spectra (DMSO-*d*<sub>6</sub>, 100 MHz) of compound **10b**

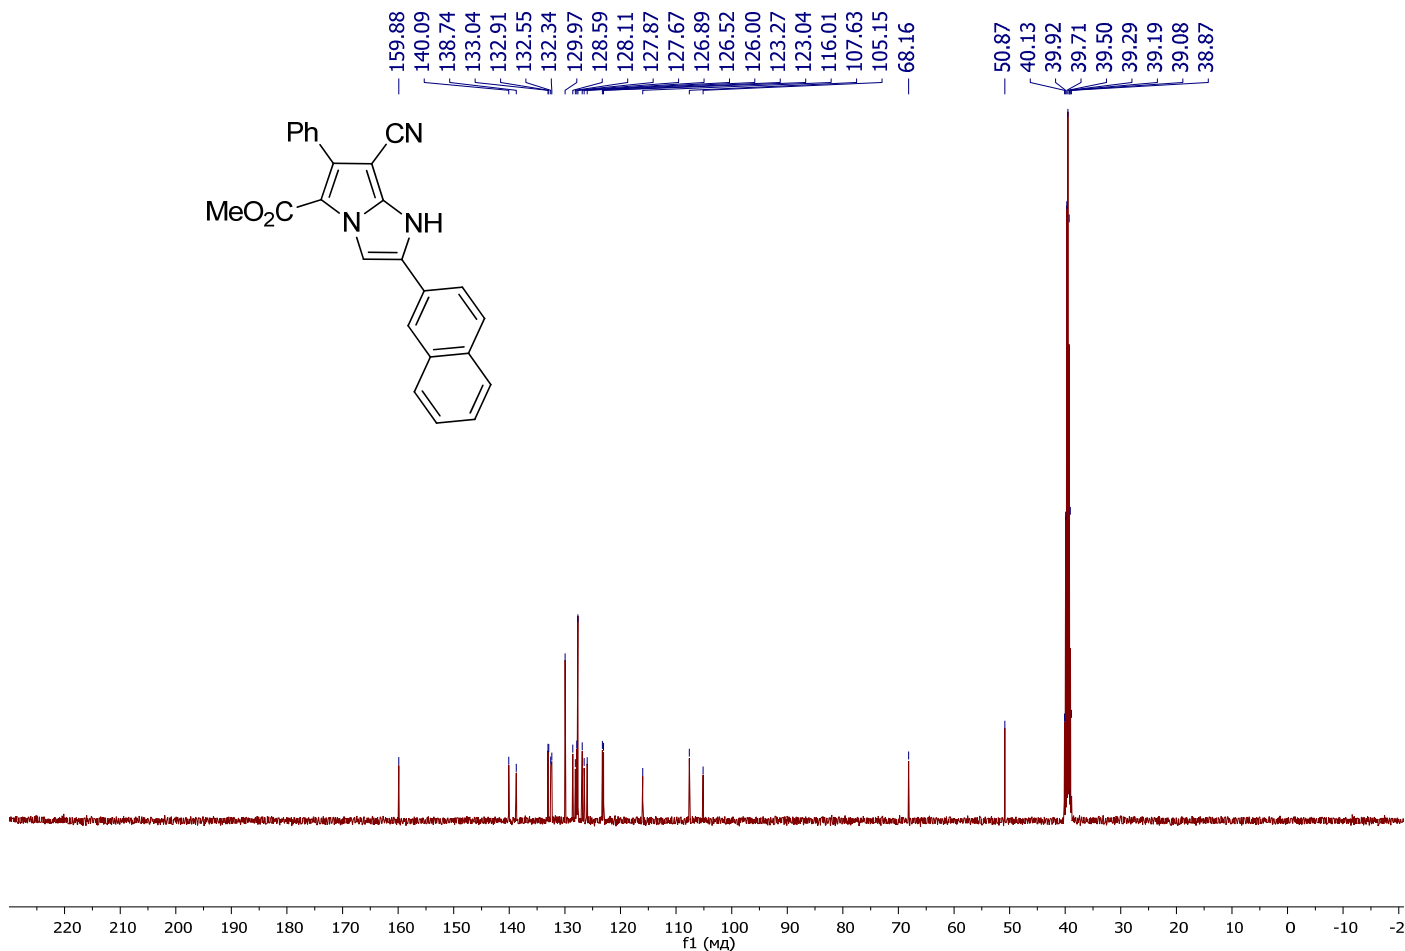

$^1\text{H}$  NMR spectra (DMSO- $d_6$ , 400 MHz) of compound **10c**

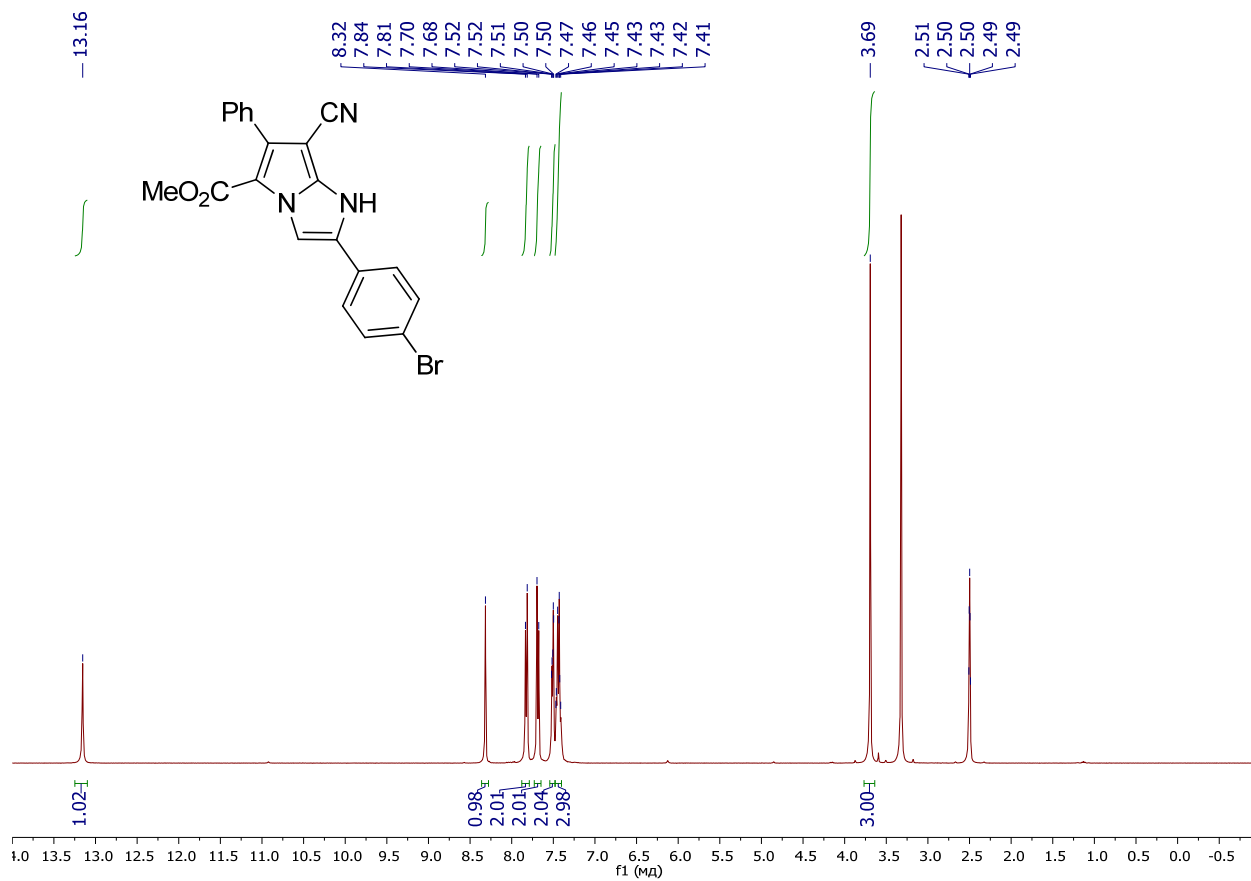

$^{13}\text{C}$  NMR spectra (DMSO- $d_6$ , 100 MHz) of compound **10c**

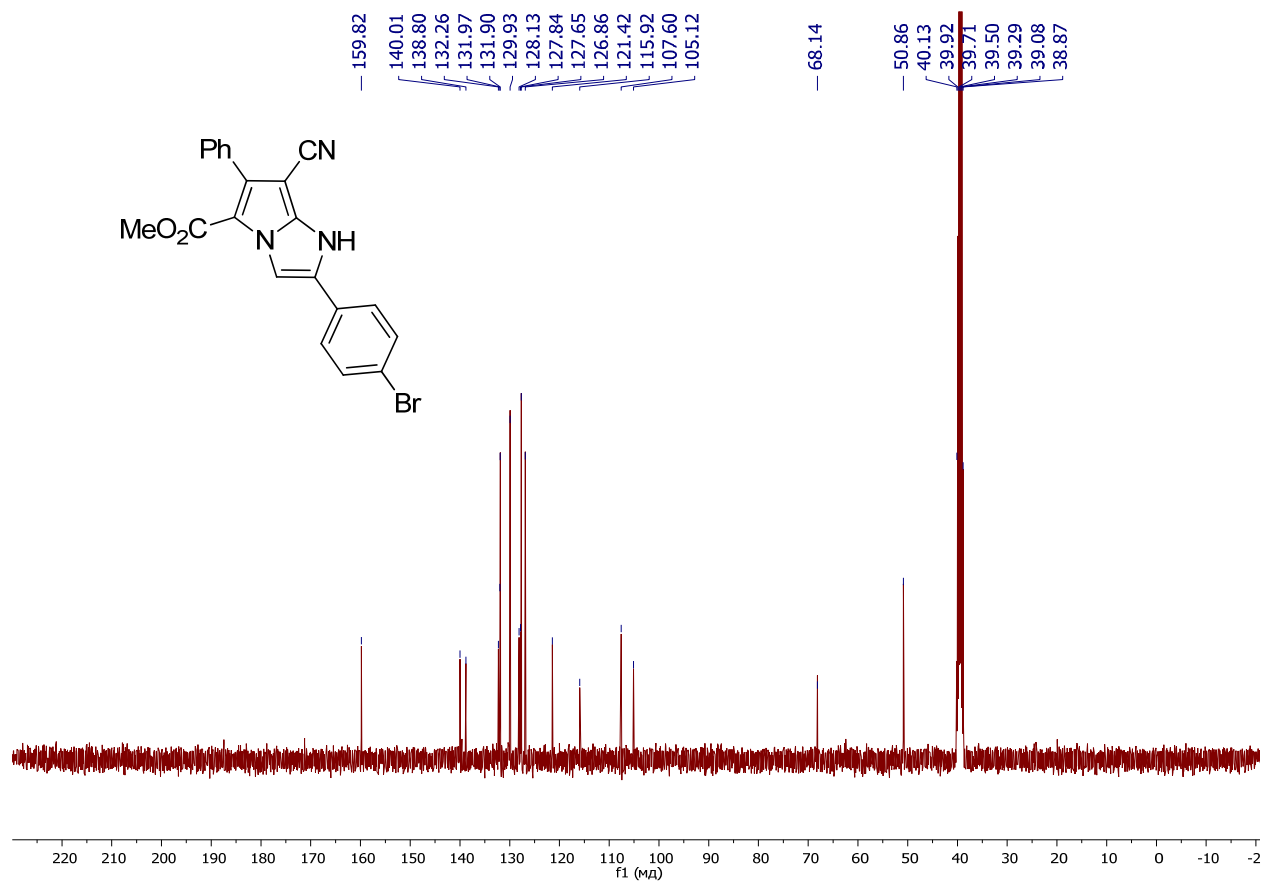

$^1\text{H}$  NMR spectra (DMSO- $d_6$ , 400 MHz) of compound **10d**

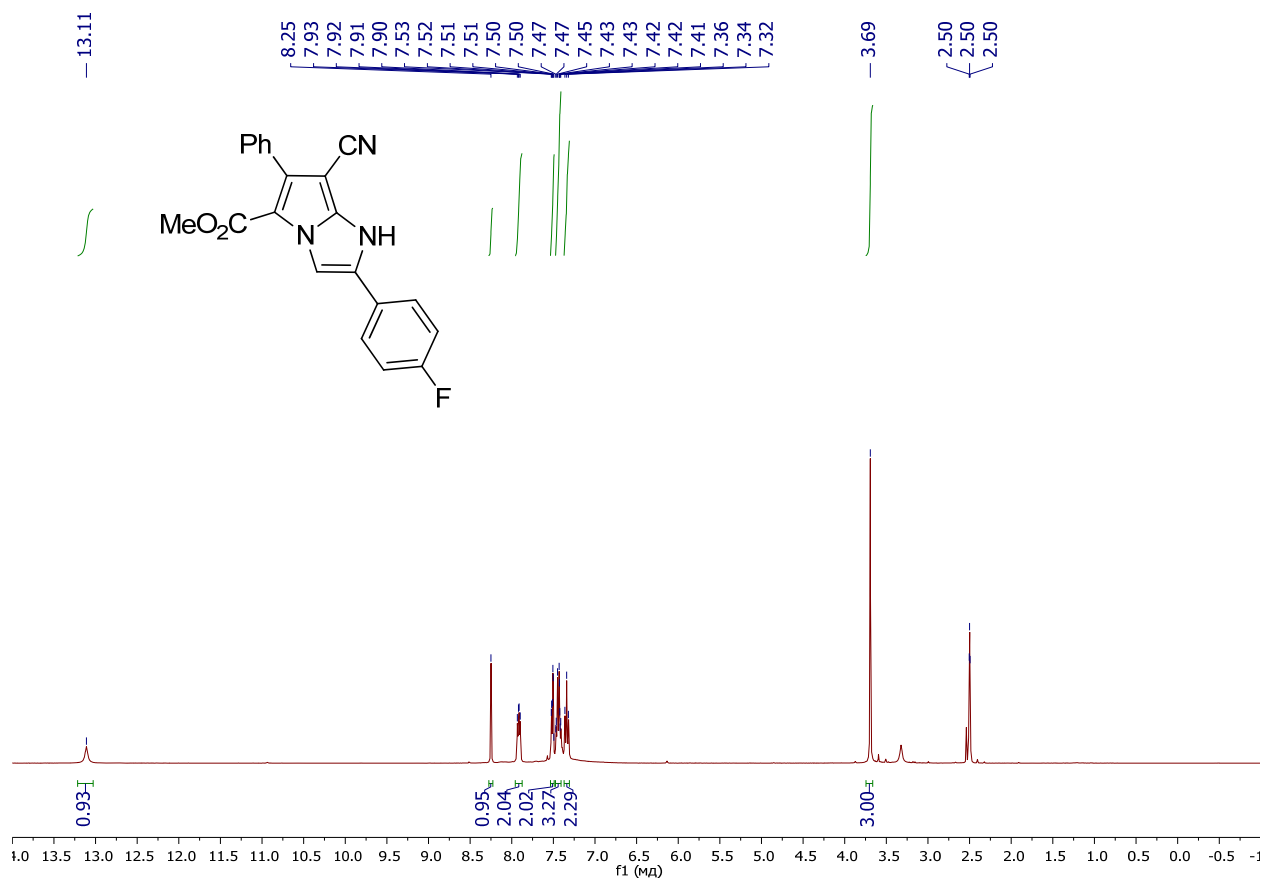

$^{13}\text{C}$  NMR spectra (DMSO- $d_6$ , 100 MHz) of compound **10d**

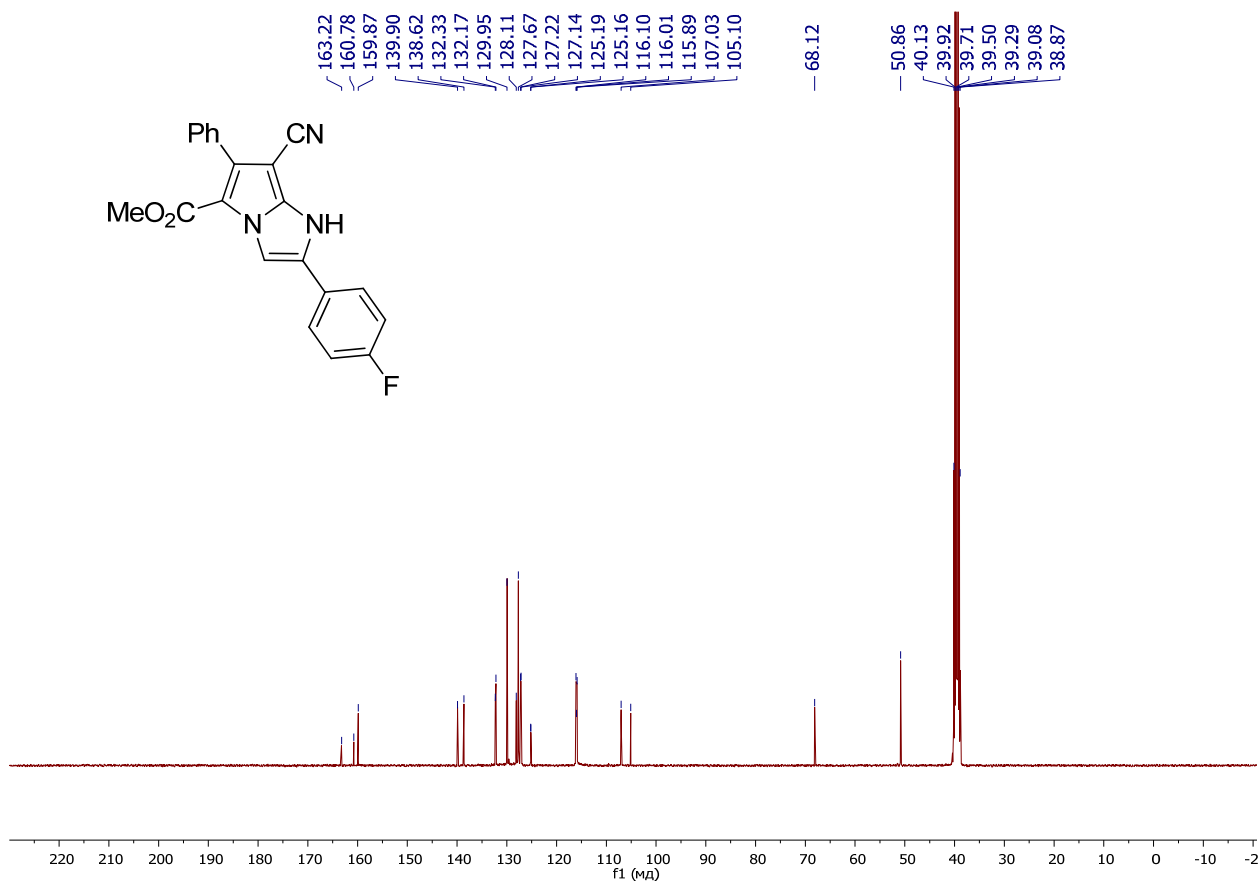



$^1\text{H}$  NMR spectra (DMSO- $d_6$ , 400 MHz) of compound **10e**

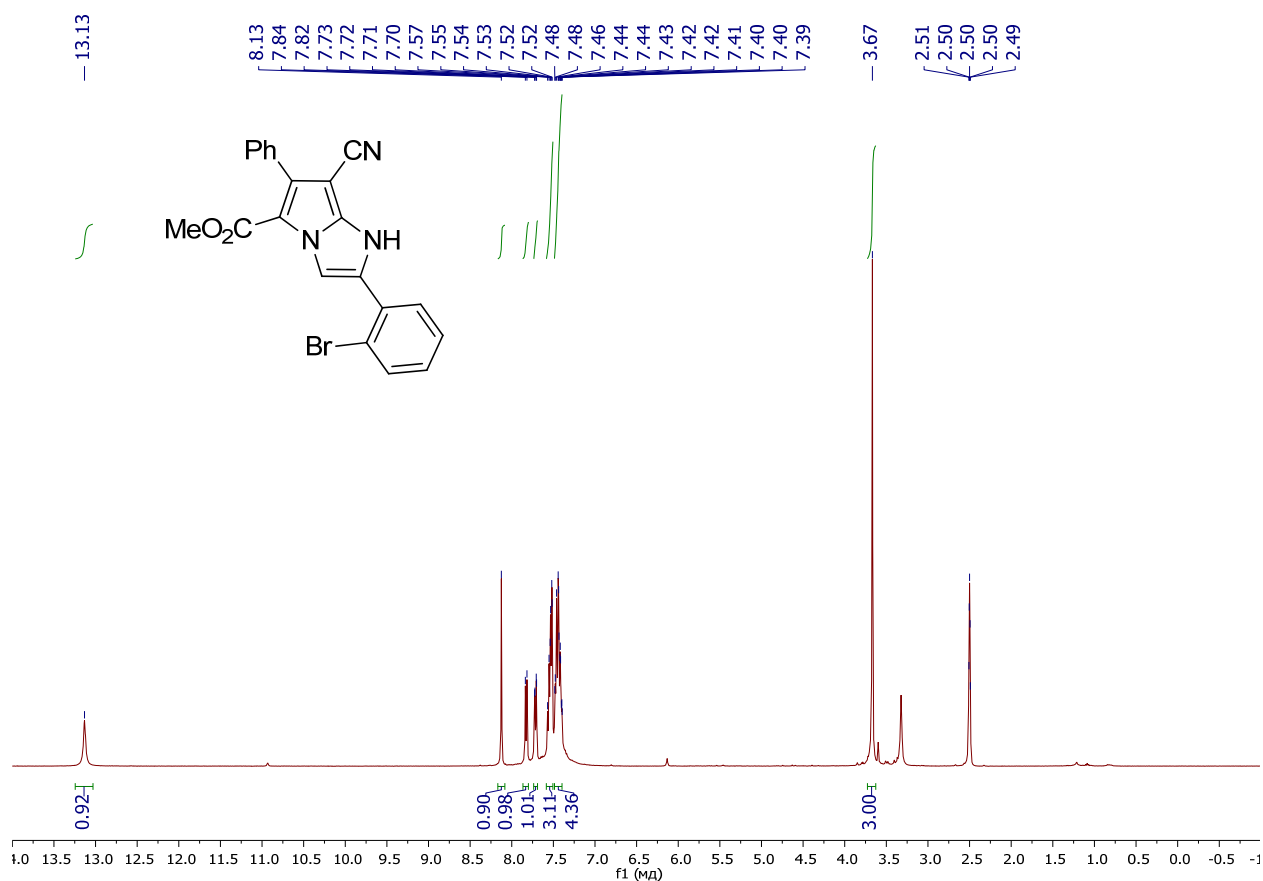

$^{13}\text{C}$  NMR spectra (DMSO- $d_6$ , 100 MHz) of compound **10e**

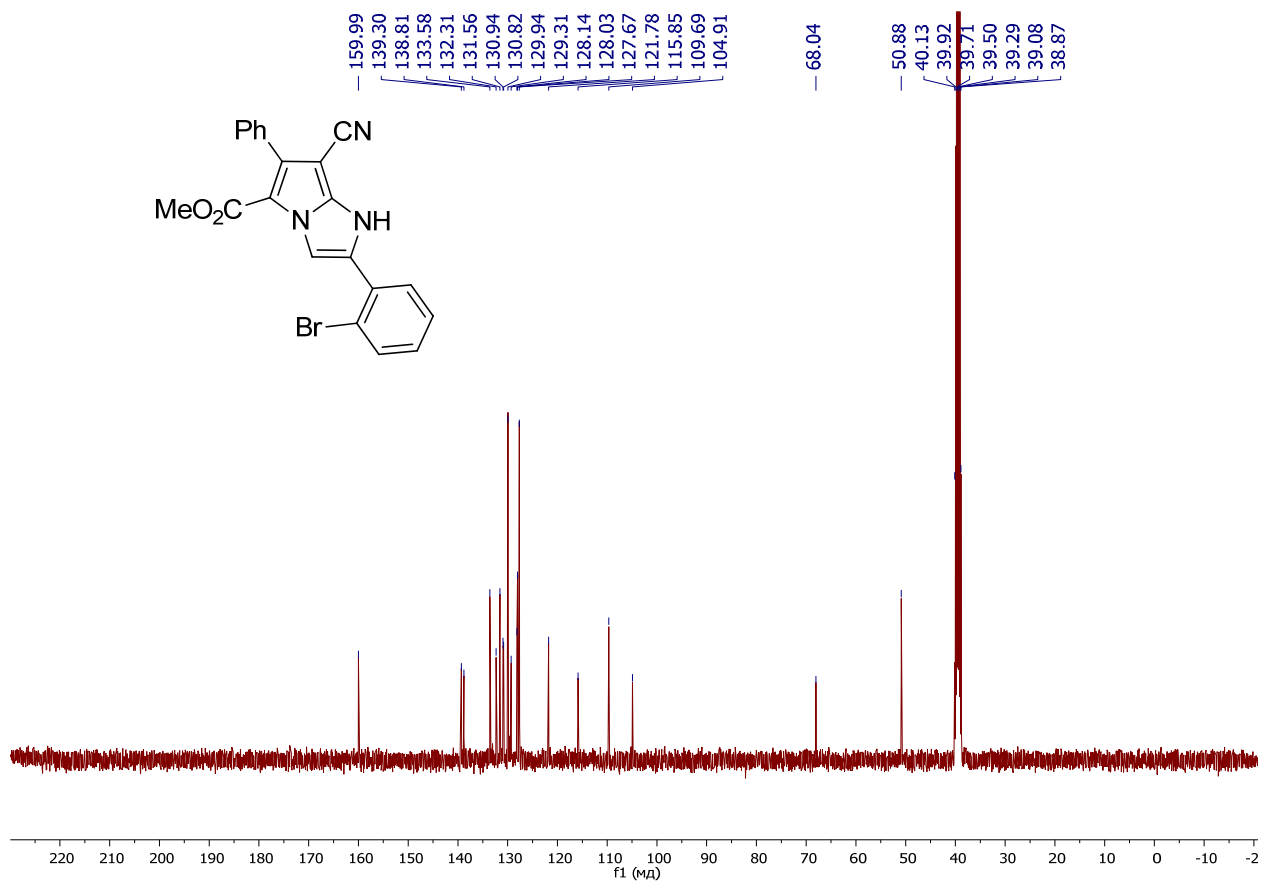

$^1\text{H}$  NMR spectra (DMSO- $d_6$ , 400 MHz) of compound **10f**

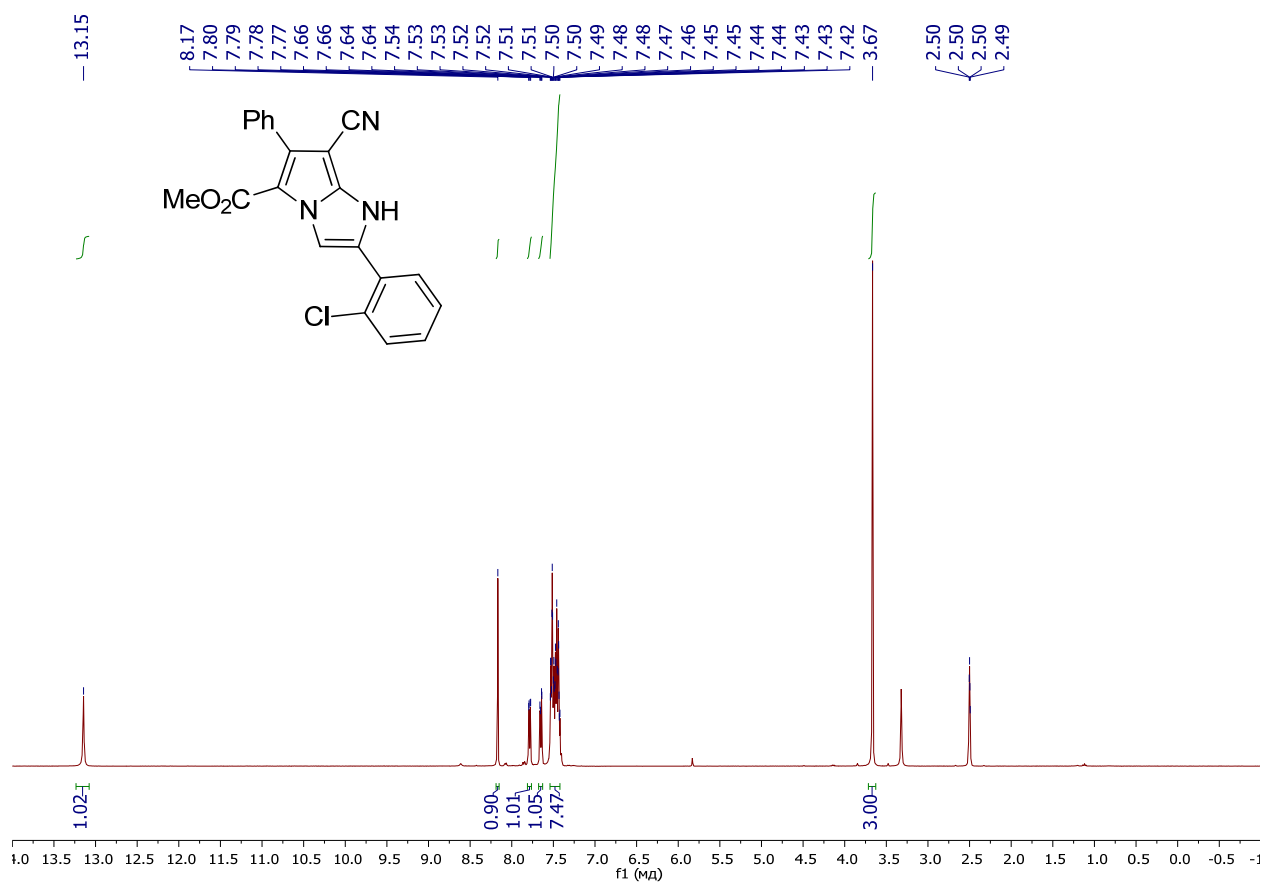

$^{13}\text{C}$  NMR spectra (DMSO- $d_6$ , 100 MHz) of compound **10f**

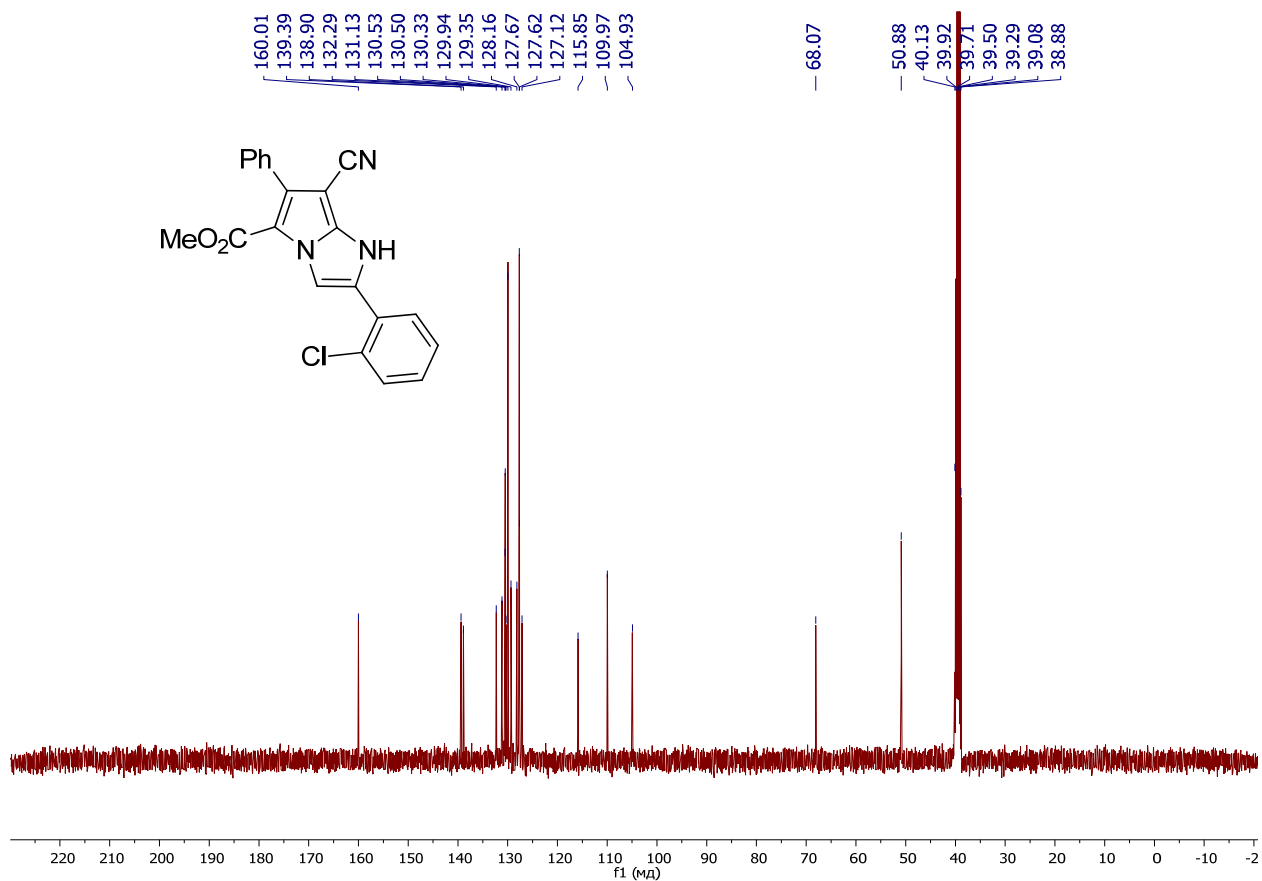

$^1\text{H}$  NMR spectra (DMSO- $d_6$ , 400 MHz) of compound **10g**

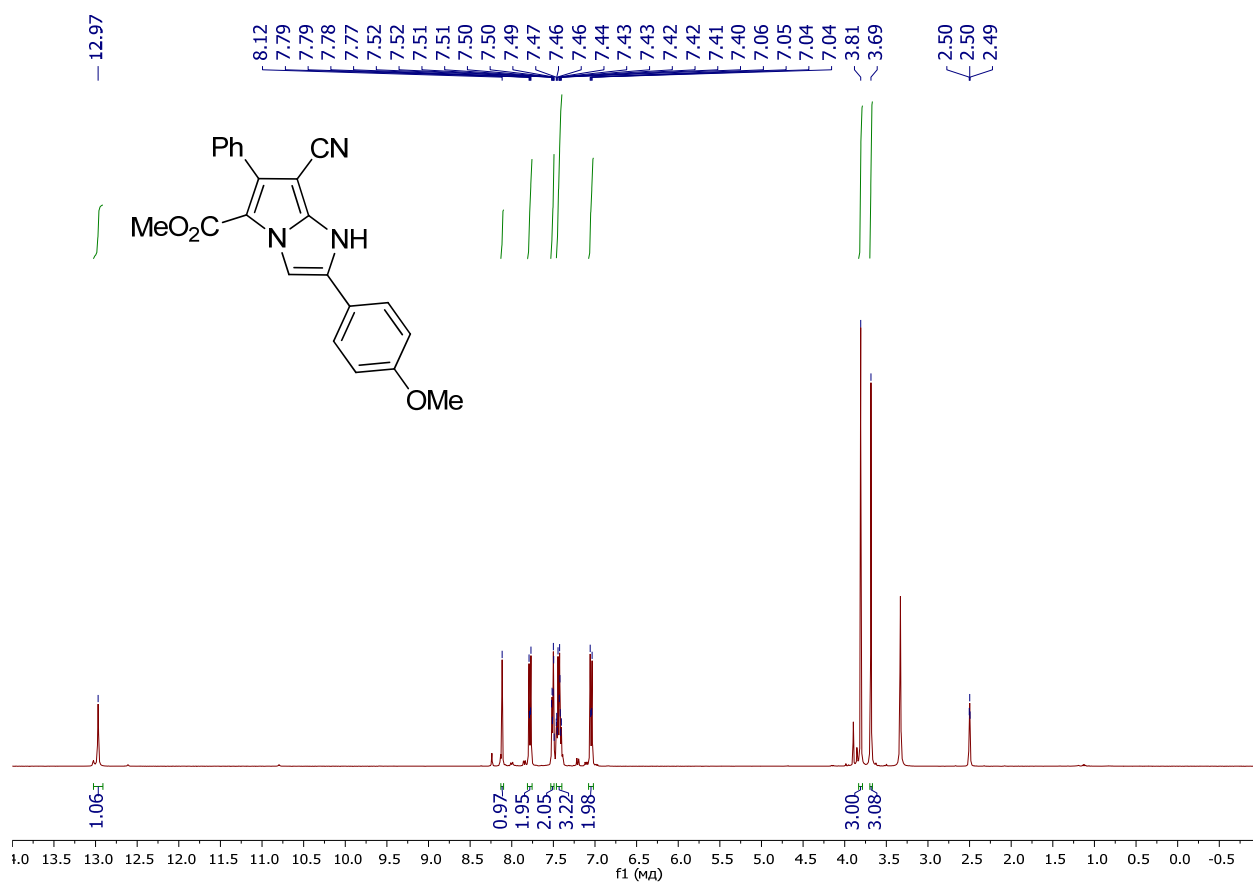

$^{13}\text{C}$  NMR spectra (DMSO- $d_6$ , 100 MHz) of compound **10g**

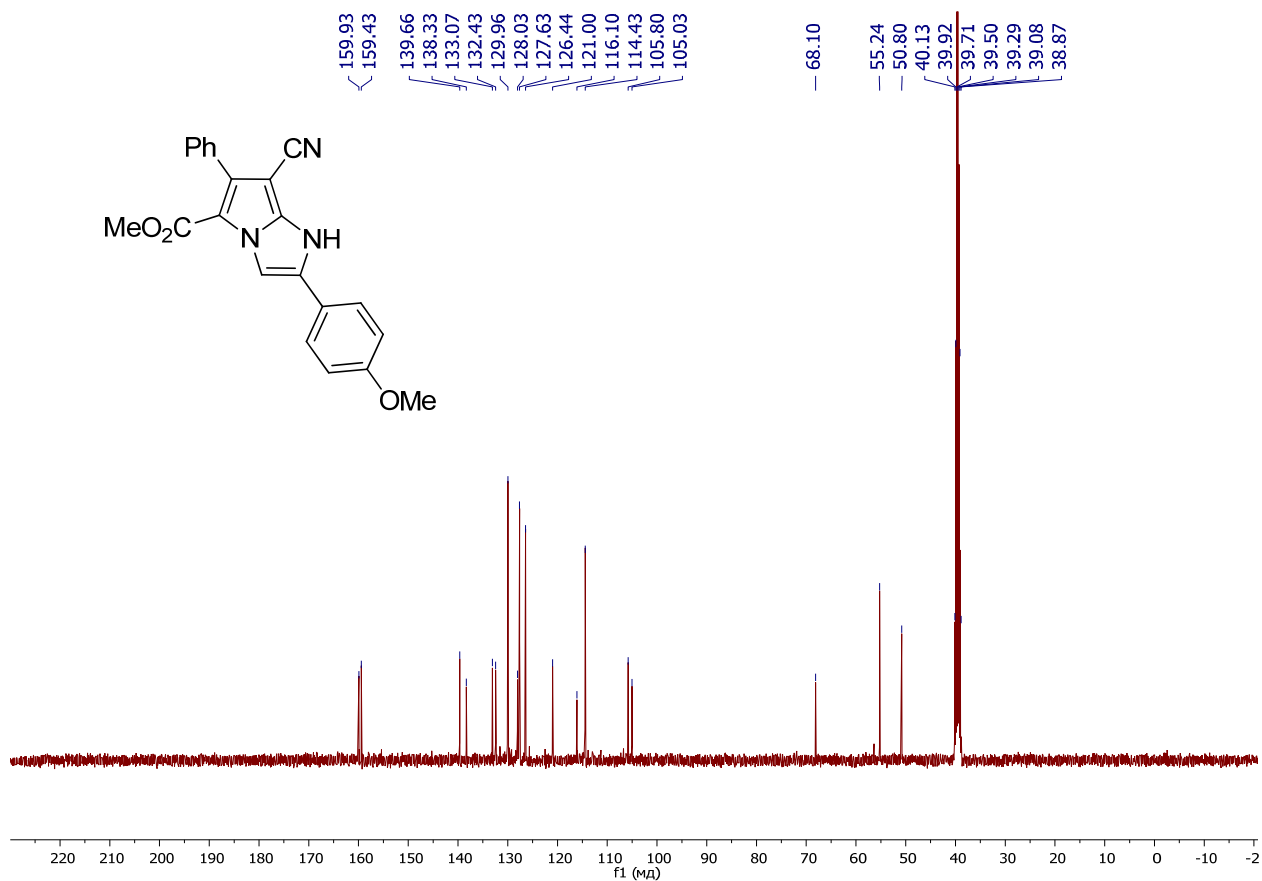

$^1\text{H}$  NMR spectra (DMSO- $d_6$ , 400 MHz) of compound **10h**

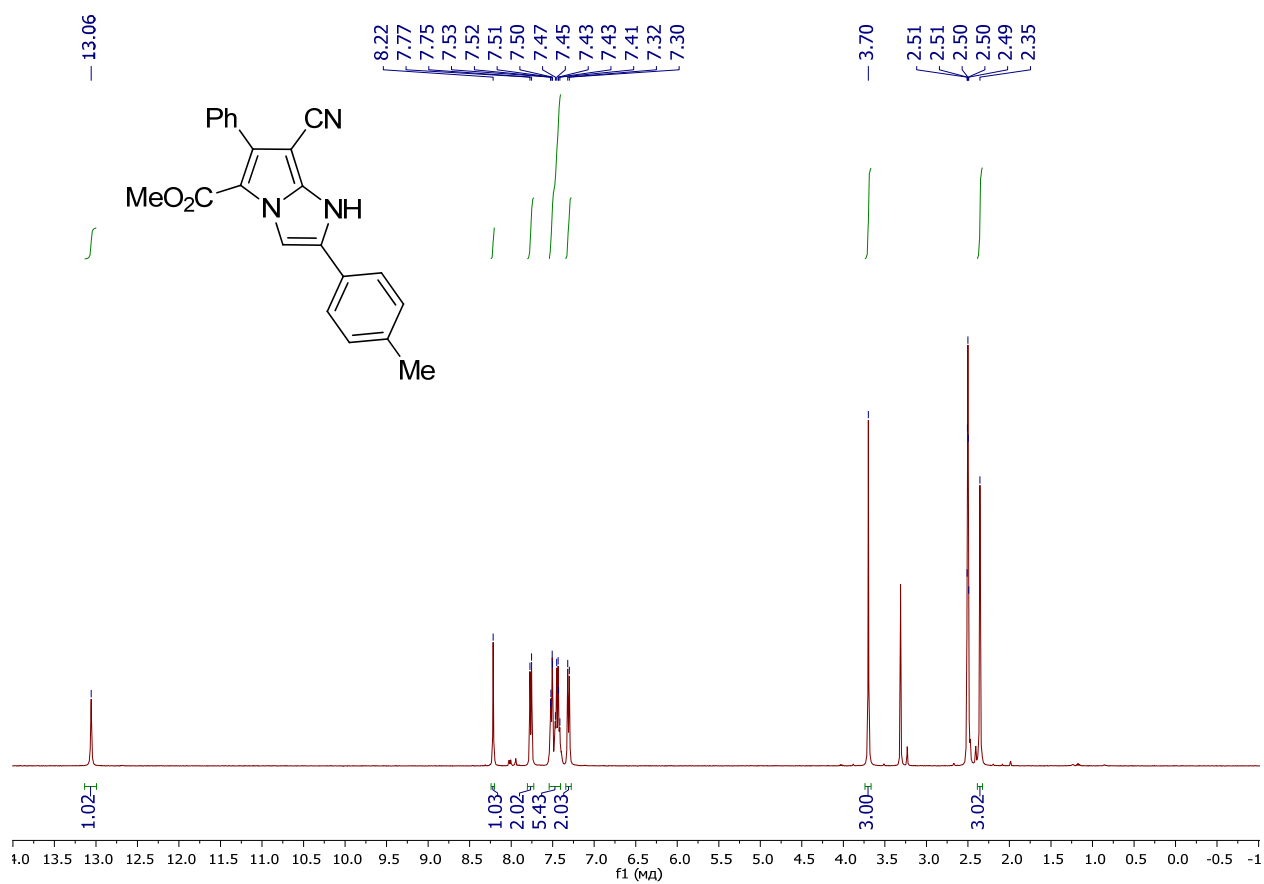

$^{13}\text{C}$  NMR spectra (DMSO- $d_6$ , 100 MHz) of compound **10h**

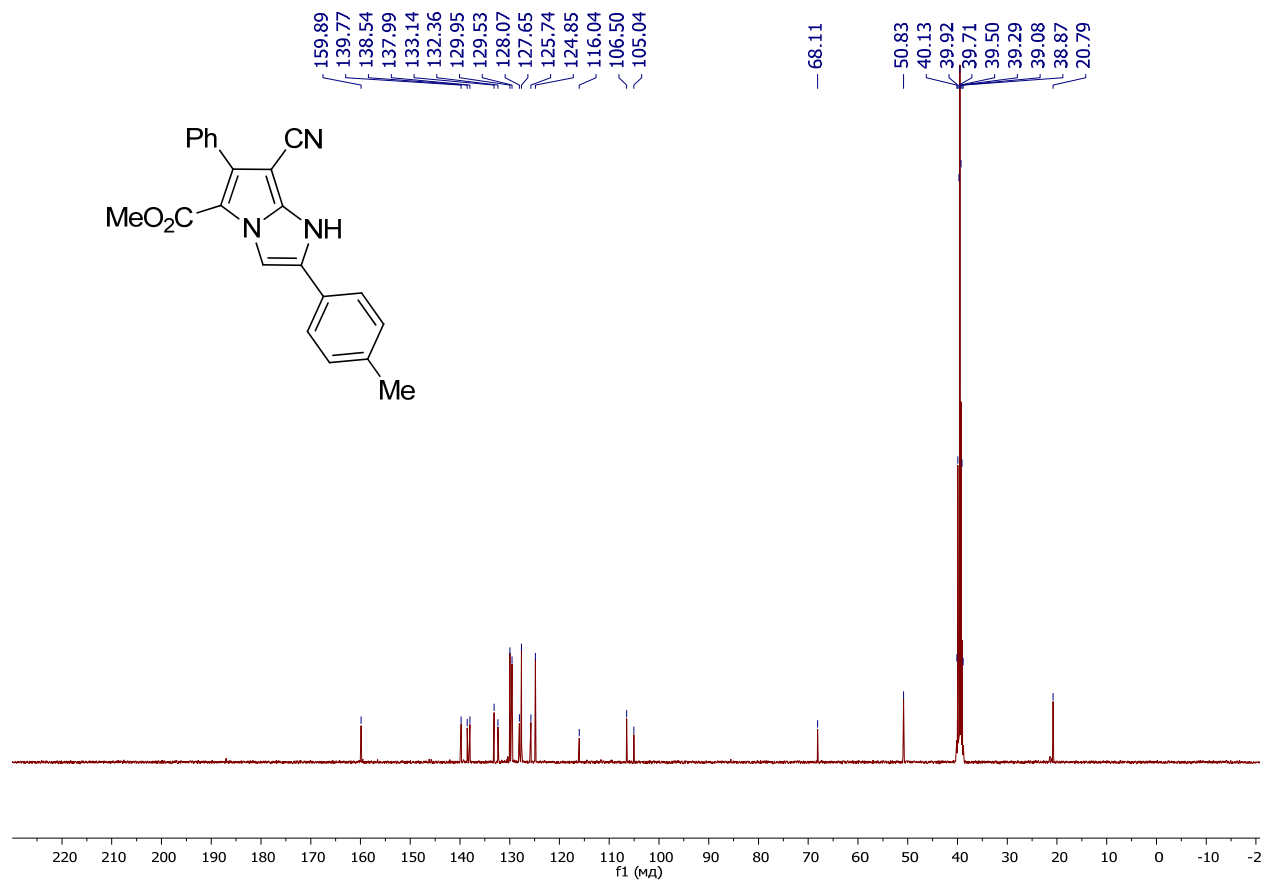

<sup>1</sup>H NMR spectra (CDCl<sub>3</sub>, 400 MHz) of compound **12**

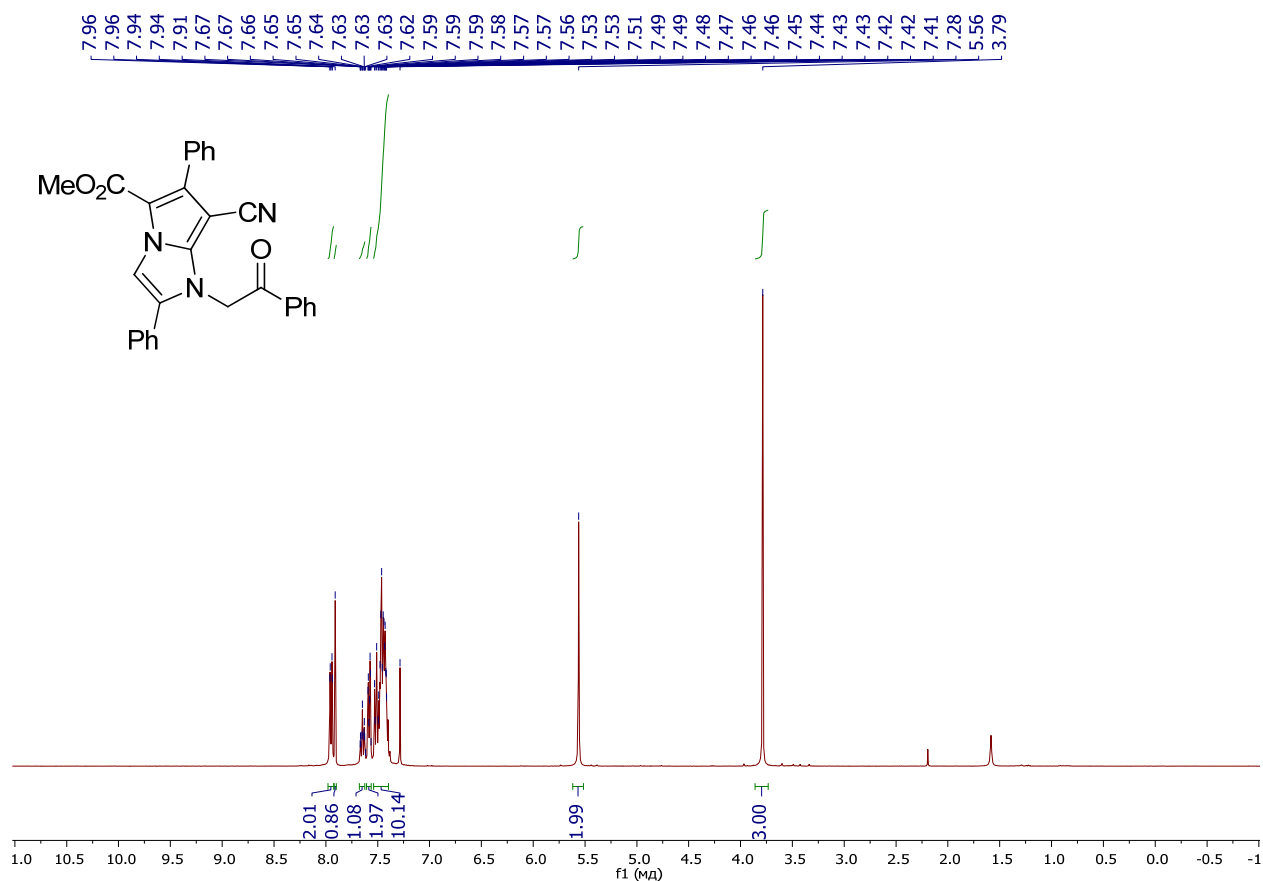

<sup>13</sup>C NMR spectra (CDCl<sub>3</sub>, 100 MHz) of compound **12**

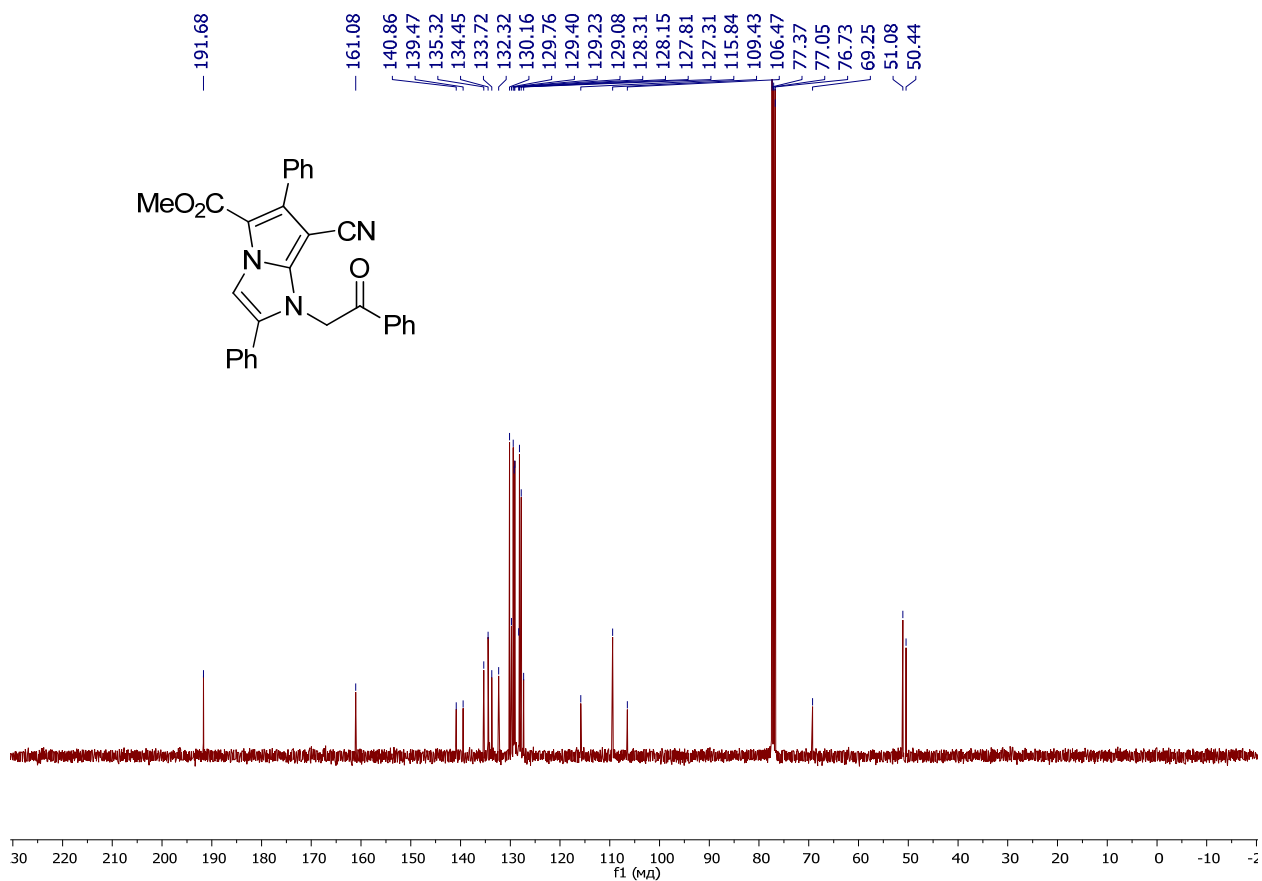

$^1\text{H}$  NMR spectra (DMSO- $d_6$ , 400 MHz) of compound **14a**

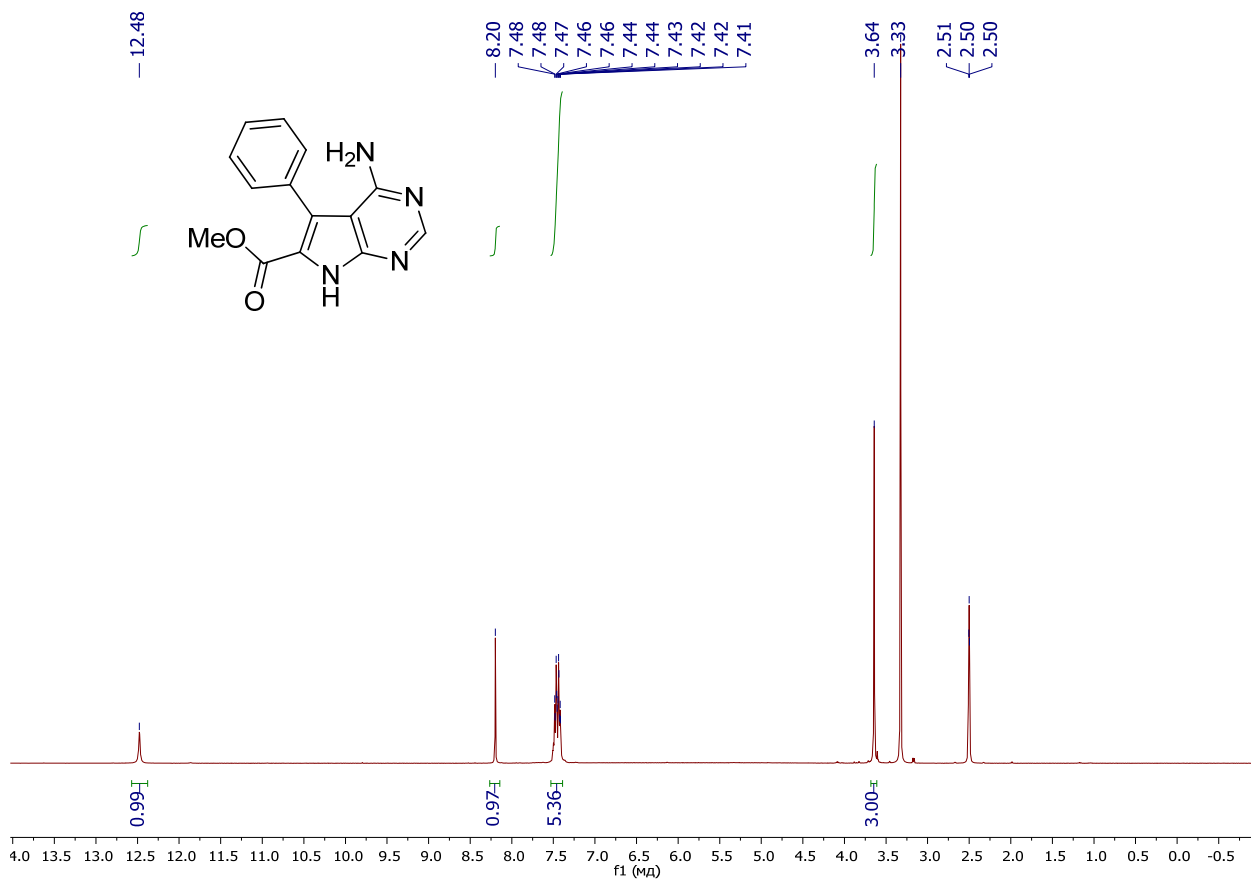

$^{13}\text{C}$  NMR spectra (DMSO- $d_6$ , 100 MHz) of compound **14a**

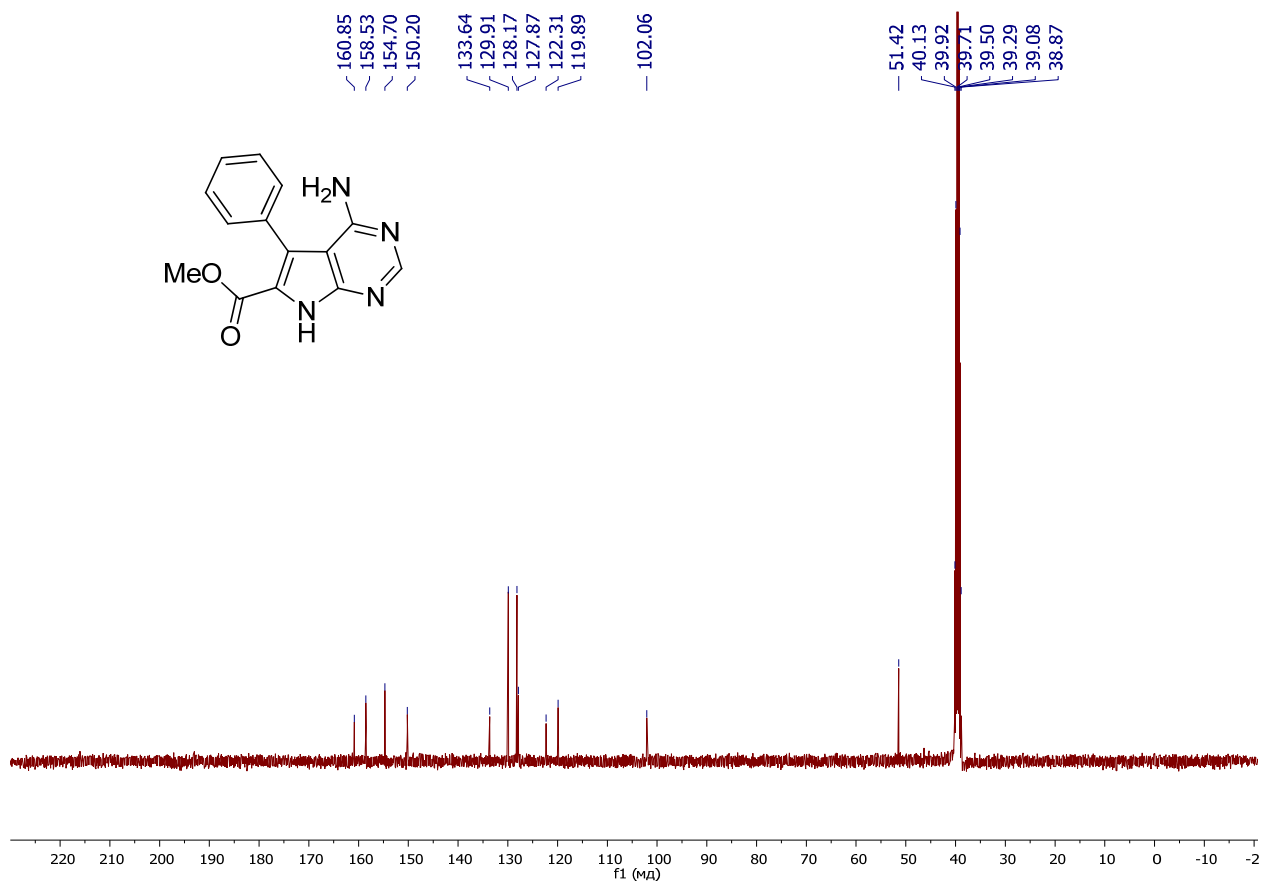

$^1\text{H}$  NMR spectra (DMSO- $d_6$ , 400 MHz) of compound **14b**

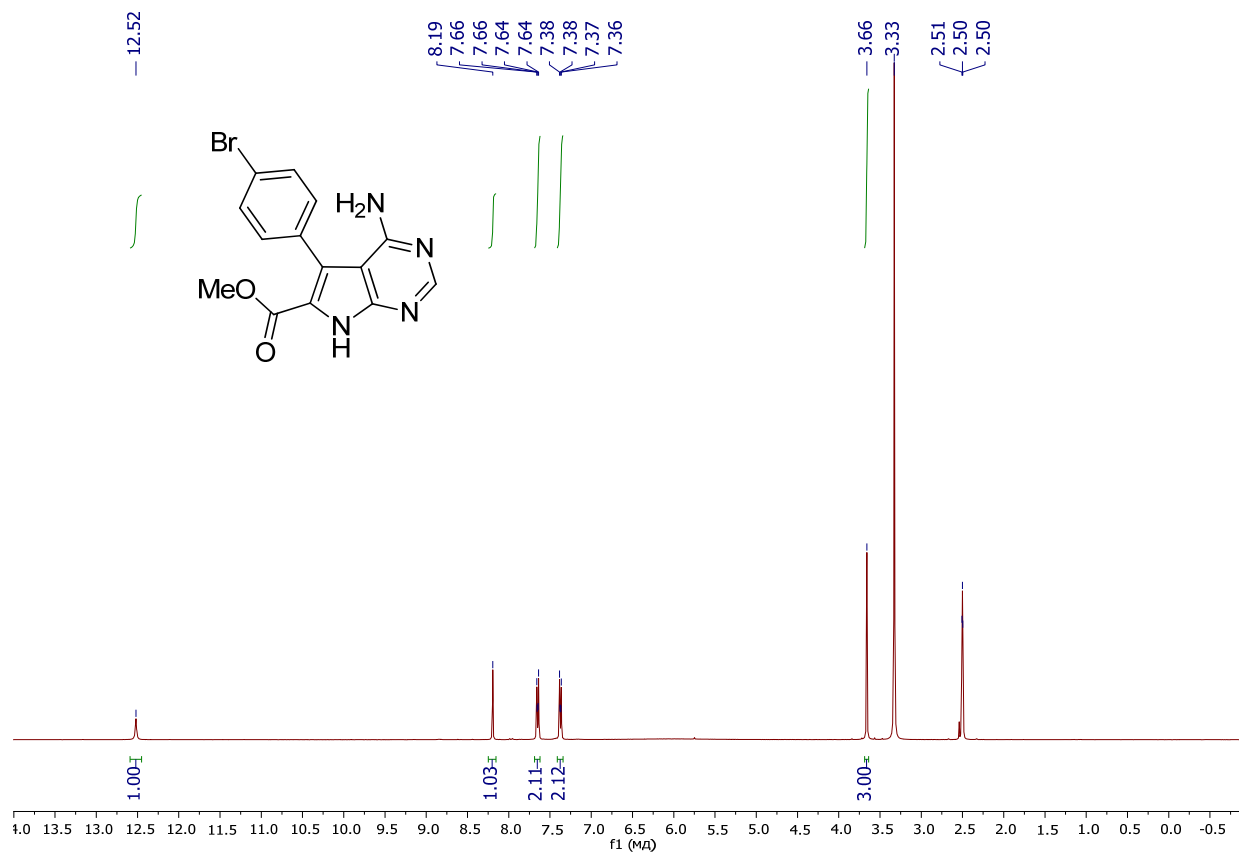

$^{13}\text{C}$  NMR spectra (DMSO- $d_6$ , 100 MHz) of compound **14b**

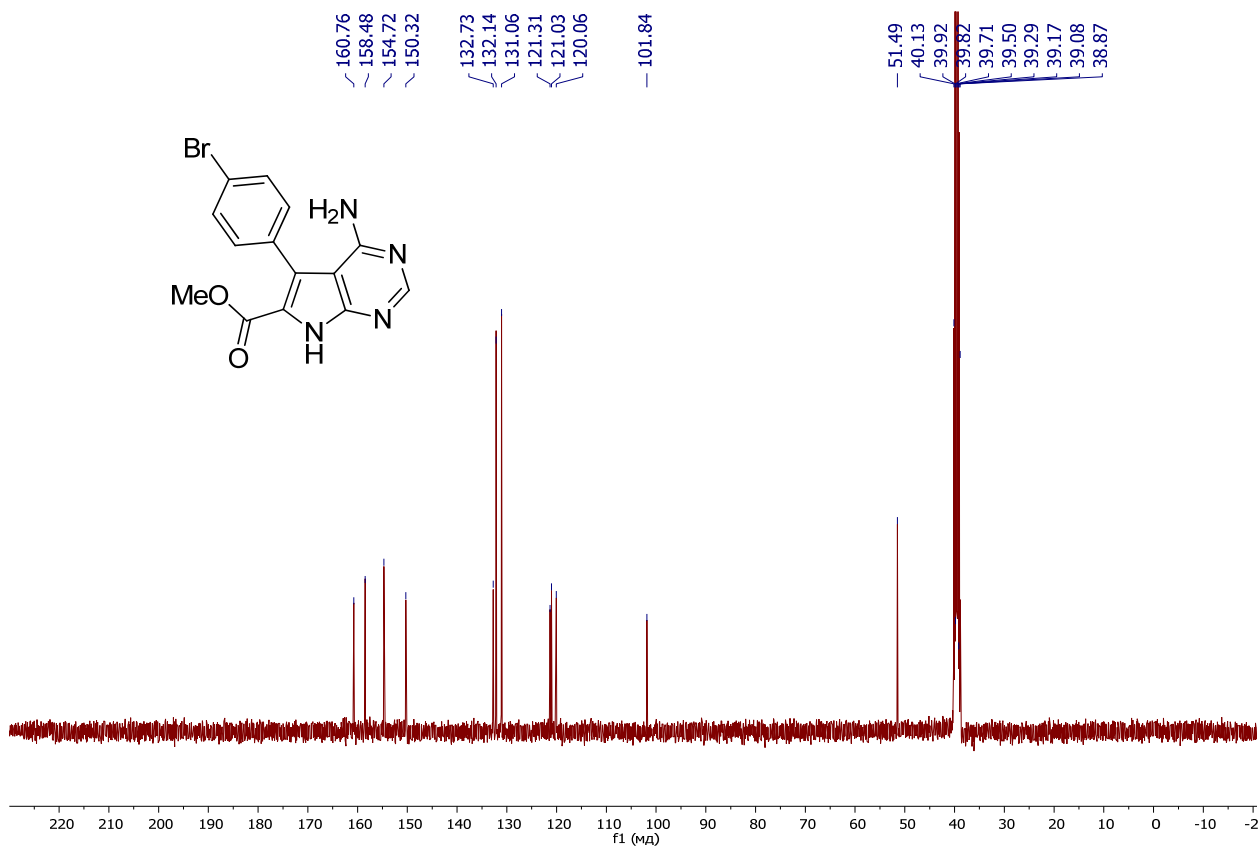

$^1\text{H}$  NMR spectra (DMSO- $d_6$ , 400 MHz) of compound **14c**

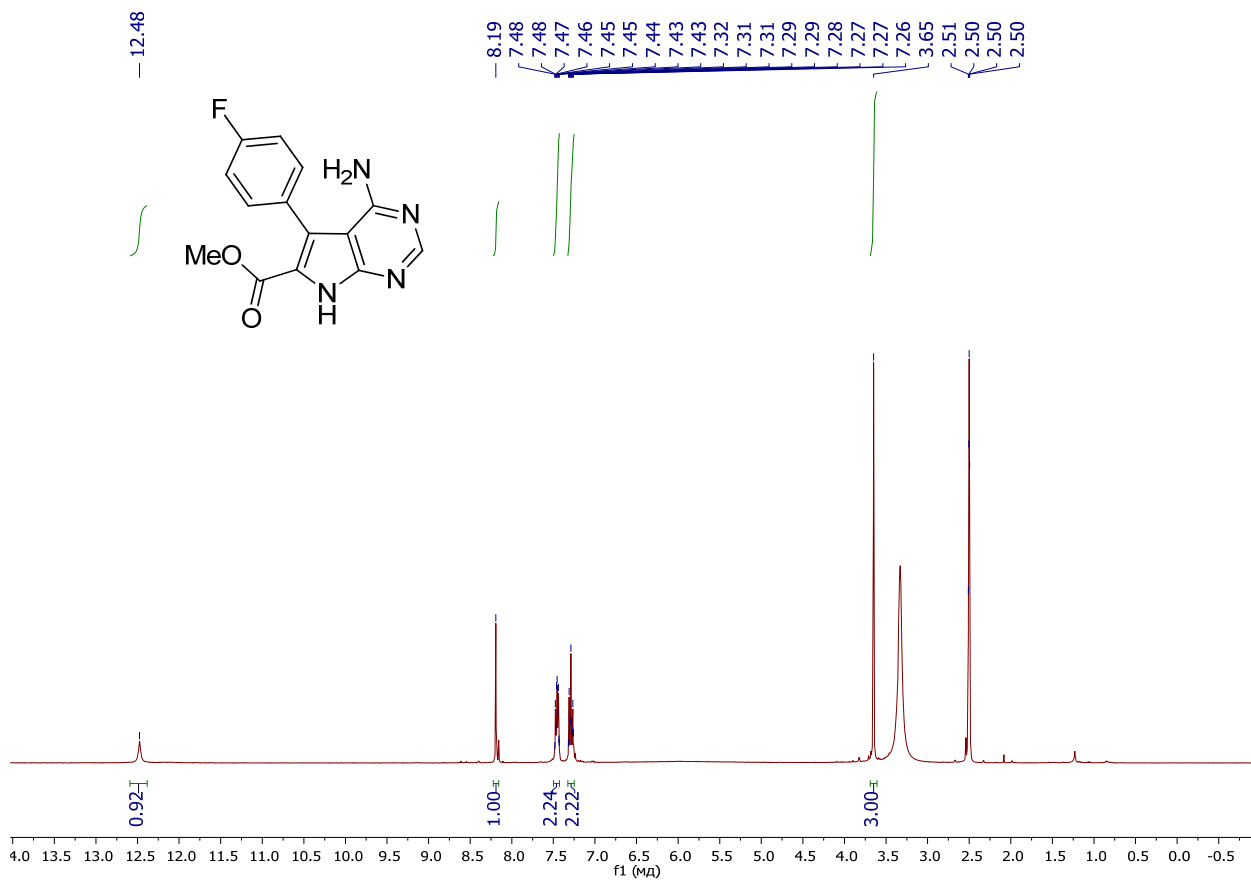

$^{13}\text{C}$  NMR spectra (DMSO- $d_6$ , 100 MHz) of compound **14c**

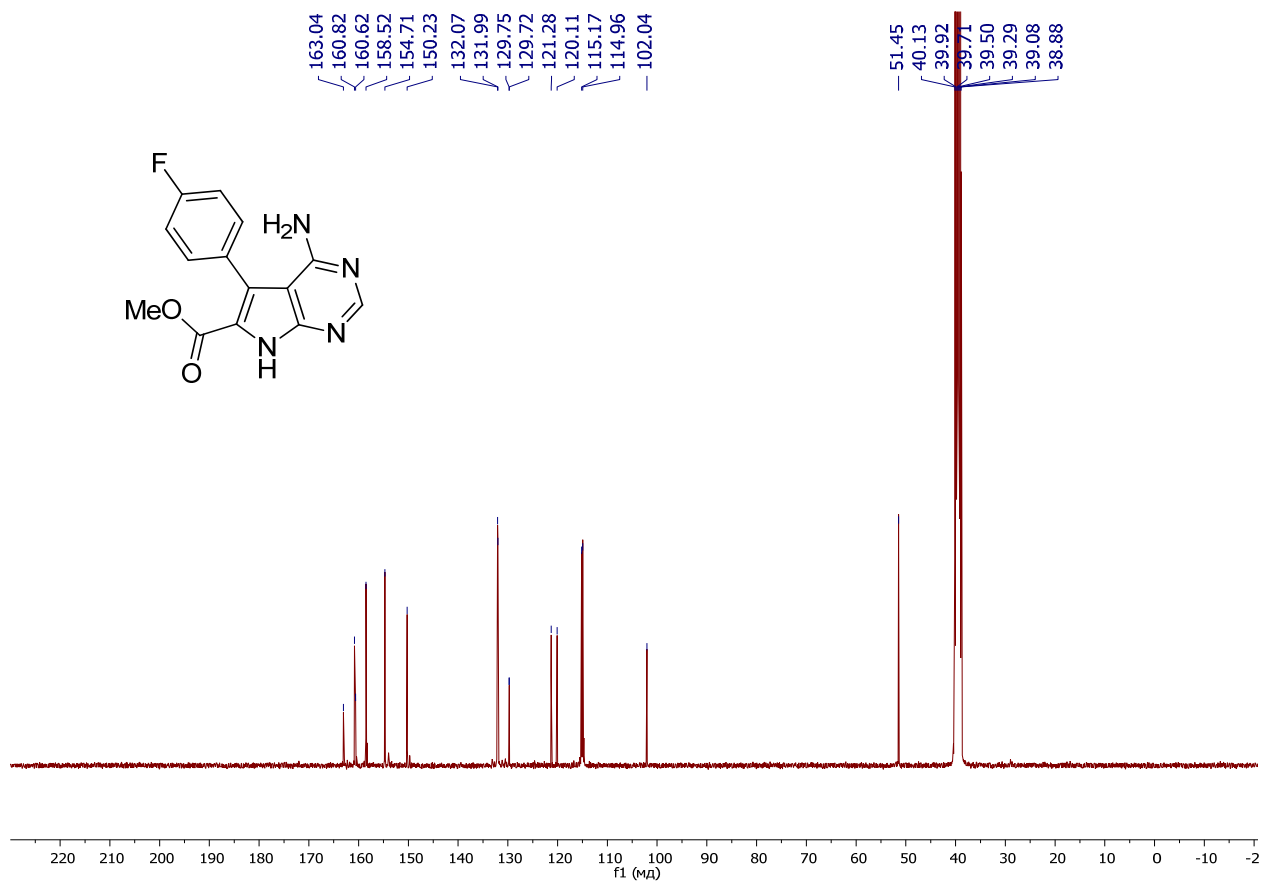



$^1\text{H}$  NMR spectra (DMSO- $d_6$ , 400 MHz) of compound **14d**

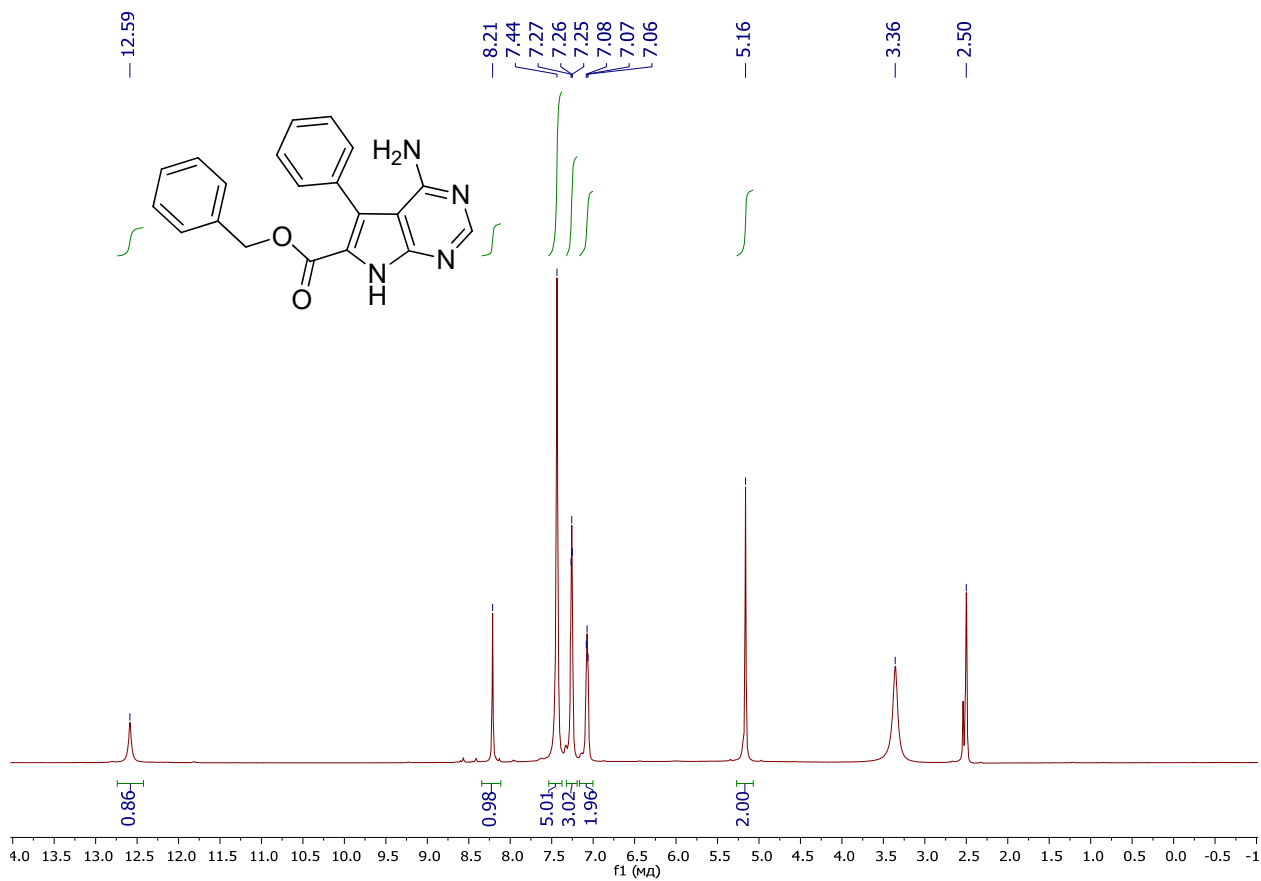

$^{13}\text{C}$  NMR spectra (DMSO- $d_6$ , 100 MHz) of compound **14d**

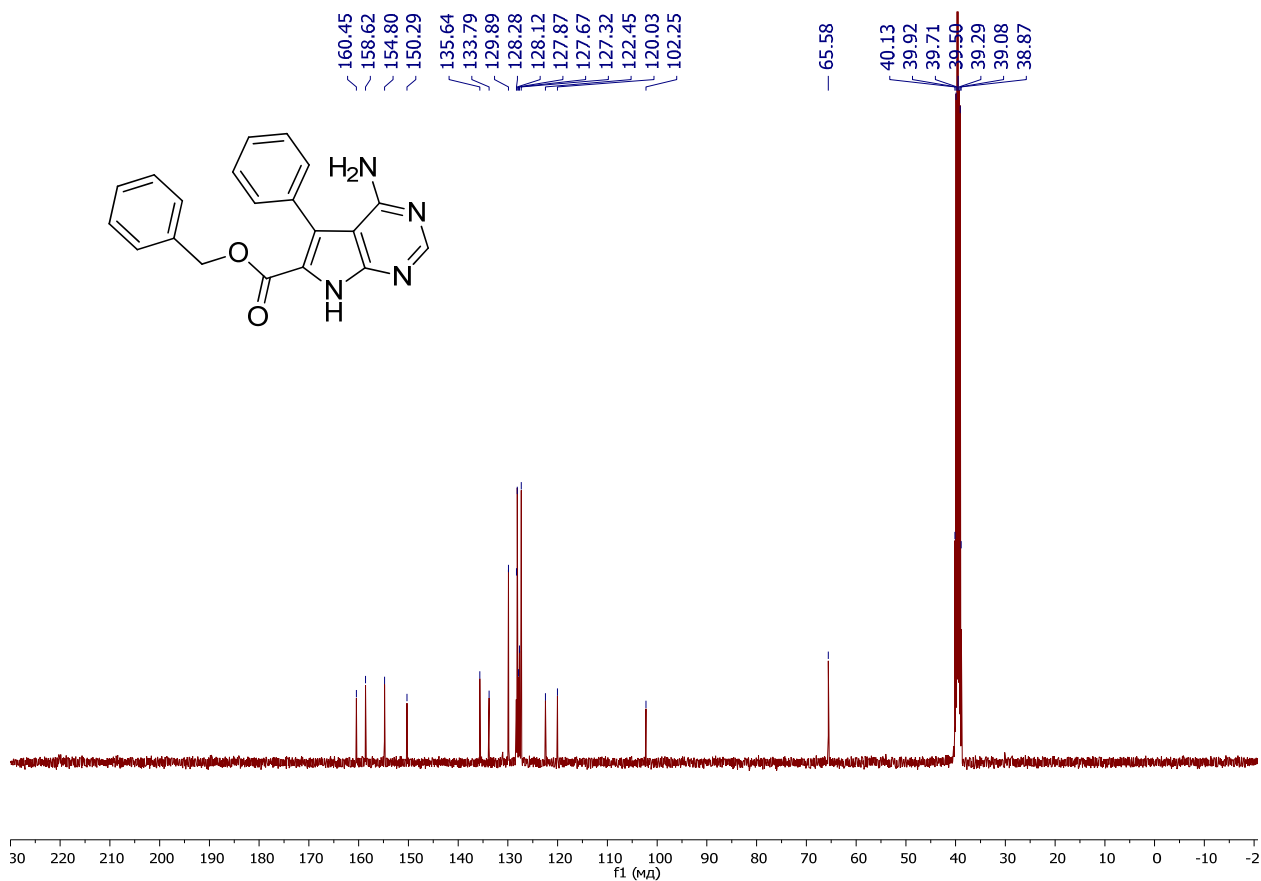

### 3. X-ray crystal structure of compound **2b**

Crystal structure of **2b** was determined by single crystal X-ray diffraction analysis. Suitable crystals were selected and fixed on micro-amounts and the diffraction data were collected on a SuperNova diffractometer. The crystals **2b** were measured at a temperature of 100(1) R, using monochromated CuK $\alpha$  radiation. The unit cell parameters and refinement characteristics of the crystal structure of **2b** is given below. Using Olex2<sup>5</sup>, the structure was solved with the ShelXT<sup>6</sup> structure solution program using Intrinsic Phasing and refined with the ShelXL<sup>7</sup> refinement package using Least Squares minimization.

#### Methyl 5-amino-4-cyano-3-phenyl-1*H*-pyrrole-2-carboxylate **2b** (CCDC 2053975)

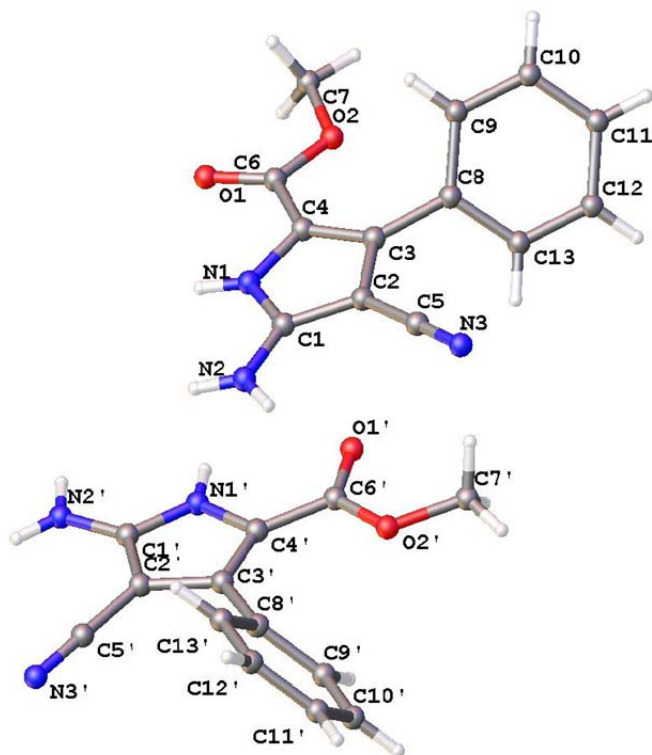

Molecular structure of compound **2b**, displacement parameters are drawn at 50% probability level.

**Table S2. Crystal data and structure refinement for 7060-11161\_lia501.**

|                                             |                                                               |
|---------------------------------------------|---------------------------------------------------------------|
| Identification code                         | 7060-11161_lia501                                             |
| Empirical formula                           | C <sub>13</sub> H <sub>11</sub> N <sub>3</sub> O <sub>2</sub> |
| Formula weight                              | 241.25                                                        |
| Temperature/K                               | 99.99(13)                                                     |
| Crystal system                              | triclinic                                                     |
| Space group                                 | P-1                                                           |
| a/Å                                         | 7.2529(3)                                                     |
| b/Å                                         | 12.9297(5)                                                    |
| c/Å                                         | 13.0243(5)                                                    |
| α/°                                         | 85.469(3)                                                     |
| β/°                                         | 82.621(3)                                                     |
| γ/°                                         | 73.765(3)                                                     |
| Volume/Å <sup>3</sup>                       | 1161.78(8)                                                    |
| Z                                           | 4                                                             |
| ρ <sub>calc</sub> /g/cm <sup>3</sup>        | 1.379                                                         |
| μ/mm <sup>-1</sup>                          | 0.793                                                         |
| F(000)                                      | 504.0                                                         |
| Crystal size/mm <sup>3</sup>                | 0.14 × 0.09 × 0.08                                            |
| Radiation                                   | CuKα (λ = 1.54184)                                            |
| 2θ range for data collection/°              | 6.85 to 124.98                                                |
| Index ranges                                | -8 ≤ h ≤ 8, -14 ≤ k ≤ 14, -14 ≤ l ≤ 14                        |
| Reflections collected                       | 16032                                                         |
| Independent reflections                     | 3695 [R <sub>int</sub> = 0.0359, R <sub>sigma</sub> = 0.0241] |
| Data/restraints/parameters                  | 3695/0/327                                                    |
| Goodness-of-fit on F <sup>2</sup>           | 1.019                                                         |
| Final R indexes [I ≥ 2σ (I)]                | R <sub>1</sub> = 0.0341, wR <sub>2</sub> = 0.0881             |
| Final R indexes [all data]                  | R <sub>1</sub> = 0.0385, wR <sub>2</sub> = 0.0920             |
| Largest diff. peak/hole / e Å <sup>-3</sup> | 0.21/-0.24                                                    |

**Table S3. Fractional Atomic Coordinates ( $\times 10^4$ ) and Equivalent Isotropic Displacement Parameters ( $\text{\AA}^2 \times 10^3$ ) for 7060-11161\_lia501.  $U_{eq}$  is defined as 1/3 of of the trace of the orthogonalised  $U_{ij}$  tensor.**

| Atom | x          | y          | z           | U(eq)   |
|------|------------|------------|-------------|---------|
| O1   | -578.4(15) | 5477.4(8)  | 6445.1(8)   | 19.5(2) |
| O2   | 366.7(15)  | 4768.5(8)  | 7992.2(7)   | 19.0(2) |
| O2'  | 8197.3(16) | 2047.6(8)  | 4738.8(8)   | 22.4(3) |
| O1'  | 6577.1(16) | 3608.1(8)  | 5464.4(8)   | 22.6(3) |
| N1   | 1622.4(17) | 3602.8(9)  | 5495.6(9)   | 15.6(3) |
| N1'  | 5558.1(18) | 4527.5(10) | 3546.1(9)   | 17.0(3) |
| N2   | 3068.6(18) | 2304.5(10) | 4252.9(9)   | 19.1(3) |
| N3   | 5018(2)    | 14.2(10)   | 6265.1(10)  | 22.9(3) |
| N2'  | 4085.2(19) | 5732.7(10) | 2246.4(10)  | 20.8(3) |
| N3'  | 6279(2)    | 3721.5(11) | 30.6(10)    | 25.5(3) |
| C3   | 2393(2)    | 2722.2(11) | 7005.2(11)  | 14.8(3) |
| C1   | 2689(2)    | 2608.3(11) | 5238.0(11)  | 14.2(3) |
| C2   | 3205(2)    | 2026.2(11) | 6162.2(11)  | 14.9(3) |
| C1'  | 5189(2)    | 4765.8(12) | 2558.4(11)  | 16.6(3) |
| C8'  | 8114(2)    | 1911.8(11) | 2407.9(10)  | 15.8(3) |
| C5   | 4201(2)    | 916.6(12)  | 6228.3(11)  | 16.1(3) |
| C6'  | 7130(2)    | 3065.5(12) | 4698.9(11)  | 16.6(3) |
| C8   | 2628(2)    | 2381.9(11) | 8103.2(11)  | 15.3(3) |
| C2'  | 6089(2)    | 3835.4(12) | 2003.0(11)  | 16.1(3) |
| C13  | 4466(2)    | 1872.1(11) | 8384.5(11)  | 17.0(3) |
| C9'  | 9988(2)    | 1430.3(12) | 2649.3(11)  | 17.4(3) |
| C9   | 1045(2)    | 2510.1(11) | 8860.2(11)  | 17.2(3) |
| C10' | 10977(2)   | 411.4(12)  | 2316.0(11)  | 19.5(3) |
| C13' | 7258(2)    | 1350.7(12) | 1826.3(11)  | 18.4(3) |
| C6   | 309(2)     | 4724.8(11) | 6980.1(11)  | 15.1(3) |
| C4'  | 6687(2)    | 3468.8(11) | 3665.2(11)  | 16.5(3) |
| C4   | 1411(2)    | 3696.6(12) | 6567.9(11)  | 16.0(3) |
| C5'  | 6187(2)    | 3769.8(11) | 914.8(12)   | 17.8(3) |
| C3'  | 7041(2)    | 3014.1(11) | 2710.0(11)  | 15.5(3) |
| C12  | 4730(2)    | 1498.2(12) | 9397.0(12)  | 20.5(3) |
| C10  | 1311(2)    | 2121.5(12) | 9869.9(11)  | 19.5(3) |
| C12' | 8242(2)    | 327.9(12)  | 1502.7(12)  | 21.1(3) |
| C11  | 3149(2)    | 1616.7(12) | 10140.5(11) | 20.6(3) |
| C11' | 10106(2)   | -140.3(12) | 1744.3(12)  | 21.6(3) |
| C7'  | 8711(2)    | 1595.7(13) | 5746.0(11)  | 23.2(3) |
| C7   | -802(2)    | 5742.1(12) | 8473.4(12)  | 21.8(3) |

**Table S4. Anisotropic Displacement Parameters ( $\text{\AA}^2 \times 10^3$ ) for 7060-11161\_lia501. The Anisotropic displacement factor exponent takes the form:  $-2\pi^2[h^2a^{*2}U_{11}+2hka^*b^*U_{12}+\dots]$ .**

| Atom | $U_{11}$ | $U_{22}$ | $U_{33}$ | $U_{23}$ | $U_{13}$ | $U_{12}$ |
|------|----------|----------|----------|----------|----------|----------|
| O1   | 22.7(6)  | 13.5(5)  | 18.1(5)  | 0.1(4)   | -3.6(4)  | 2.2(4)   |
| O2   | 24.1(6)  | 12.9(5)  | 16.3(5)  | -3.1(4)  | -3.9(4)  | 2.4(4)   |
| O2'  | 29.5(6)  | 17.9(5)  | 14.3(5)  | 1.1(4)   | -4.0(4)  | 2.6(5)   |
| O1'  | 28.1(6)  | 20.9(5)  | 15.2(5)  | -3.4(4)  | -3.8(4)  | 0.3(5)   |
| N1   | 17.8(6)  | 11.7(6)  | 14.5(6)  | 1.2(5)   | -4.0(5)  | 1.1(5)   |
| N1'  | 20.8(7)  | 15.3(6)  | 12.8(6)  | -3.0(5)  | -2.3(5)  | -0.9(5)  |
| N2   | 23.9(7)  | 14.5(6)  | 14.8(6)  | -1.3(5)  | -3.1(5)  | 2.2(5)   |
| N3   | 29.2(7)  | 16.7(7)  | 17.8(7)  | -2.1(5)  | -3.8(5)  | 2.5(6)   |
| N2'  | 26.8(7)  | 16.2(6)  | 14.1(6)  | -2.5(5)  | -3.9(5)  | 4.2(5)   |
| N3'  | 33.7(8)  | 21.5(7)  | 15.7(7)  | -0.7(5)  | -4.8(6)  | 2.5(6)   |
| C3   | 13.0(7)  | 13.6(7)  | 16.6(7)  | -1.2(6)  | -2.2(6)  | -1.3(6)  |
| C1   | 12.5(7)  | 12.7(7)  | 16.3(7)  | -1.3(6)  | -1.4(6)  | -1.3(6)  |
| C2   | 13.3(7)  | 13.0(7)  | 16.9(7)  | -1.4(6)  | -2.2(6)  | -0.5(6)  |
| C1'  | 16.5(7)  | 17.9(7)  | 15.2(7)  | 0.1(6)   | -2.0(6)  | -4.1(6)  |
| C8'  | 18.9(7)  | 16.1(7)  | 10.4(7)  | 1.4(5)   | 0.2(6)   | -2.8(6)  |
| C5   | 16.8(7)  | 18.3(8)  | 11.9(7)  | -1.7(6)  | -3.3(6)  | -1.7(6)  |
| C6'  | 14.6(7)  | 17.3(7)  | 17.1(7)  | -1.3(6)  | -1.6(6)  | -3.0(6)  |
| C8   | 19.3(8)  | 9.0(7)   | 16.7(7)  | -2.0(5)  | -2.8(6)  | -1.6(6)  |
| C2'  | 15.6(7)  | 17.3(7)  | 14.2(7)  | -0.9(6)  | -2.4(6)  | -2.3(6)  |
| C13  | 17.8(7)  | 15.2(7)  | 16.4(7)  | -2.2(6)  | -1.1(6)  | -1.8(6)  |
| C9'  | 20.3(8)  | 18.6(7)  | 13.0(7)  | 0.4(6)   | -2.9(6)  | -4.6(6)  |
| C9   | 17.3(8)  | 12.7(7)  | 20.5(7)  | -3.1(6)  | -3.0(6)  | -1.0(6)  |
| C10' | 17.1(8)  | 19.4(8)  | 17.9(7)  | 3.1(6)   | -2.5(6)  | 0.8(6)   |
| C13' | 17.6(8)  | 19.3(7)  | 16.9(7)  | 1.5(6)   | -3.4(6)  | -2.6(6)  |
| C6   | 14.4(7)  | 14.2(7)  | 15.5(7)  | 0.3(6)   | -1.8(6)  | -2.2(6)  |
| C4'  | 16.8(7)  | 14.6(7)  | 16.8(7)  | -0.1(6)  | -2.8(6)  | -1.9(6)  |
| C4   | 17.0(7)  | 14.8(7)  | 14.5(7)  | -1.7(6)  | -2.0(6)  | -1.0(6)  |
| C5'  | 16.0(7)  | 12.5(7)  | 21.5(9)  | -0.4(6)  | -2.3(6)  | 1.9(6)   |
| C3'  | 13.6(7)  | 16.6(7)  | 15.8(7)  | -0.1(6)  | -1.7(6)  | -3.6(6)  |
| C12  | 19.7(8)  | 19.9(8)  | 21.1(8)  | -0.1(6)  | -6.5(6)  | -2.2(6)  |
| C10  | 24.1(8)  | 16.6(7)  | 16.8(7)  | -4.6(6)  | 2.9(6)   | -5.2(6)  |
| C12' | 26.2(8)  | 17.7(8)  | 19.8(8)  | -2.2(6)  | -3.8(6)  | -5.8(7)  |
| C11  | 29.1(9)  | 18.9(8)  | 14.2(7)  | 0.6(6)   | -4.8(6)  | -6.4(7)  |
| C11' | 26.4(9)  | 13.5(7)  | 20.9(8)  | -0.7(6)  | -0.1(6)  | 0.0(7)   |
| C7'  | 24.1(8)  | 25.3(8)  | 16.3(7)  | 6.1(6)   | -5.0(6)  | -1.4(7)  |
| C7   | 24.5(8)  | 17.3(8)  | 20.3(8)  | -7.0(6)  | -0.1(6)  | 0.4(6)   |

**Table S5. Bond Lengths for 7060-11161\_lia501.**

| Atom | Atom | Length/Å   | Atom | Atom | Length/Å |
|------|------|------------|------|------|----------|
| O1   | C6   | 1.2266(17) | C1'  | C2'  | 1.405(2) |
| O2   | C6   | 1.3304(17) | C8'  | C9'  | 1.393(2) |
| O2   | C7   | 1.4448(17) | C8'  | C13' | 1.395(2) |
| O2'  | C6'  | 1.3281(18) | C8'  | C3'  | 1.477(2) |
| O2'  | C7'  | 1.4435(17) | C6'  | C4'  | 1.447(2) |
| O1'  | C6'  | 1.2238(18) | C8   | C13  | 1.394(2) |
| N1   | C1   | 1.3451(18) | C8   | C9   | 1.395(2) |
| N1   | C4   | 1.3965(19) | C2'  | C5'  | 1.418(2) |
| N1'  | C1'  | 1.3422(19) | C2'  | C3'  | 1.432(2) |
| N1'  | C4'  | 1.3931(19) | C13  | C12  | 1.386(2) |
| N2   | C1   | 1.3434(19) | C9'  | C10' | 1.386(2) |
| N3   | C5   | 1.1519(19) | C9   | C10  | 1.388(2) |
| N2'  | C1'  | 1.3462(19) | C10' | C11' | 1.386(2) |
| N3'  | C5'  | 1.151(2)   | C13' | C12' | 1.385(2) |
| C3   | C2   | 1.434(2)   | C6   | C4   | 1.450(2) |
| C3   | C8   | 1.480(2)   | C4'  | C3'  | 1.381(2) |
| C3   | C4   | 1.381(2)   | C12  | C11  | 1.384(2) |
| C1   | C2   | 1.404(2)   | C10  | C11  | 1.388(2) |
| C2   | C5   | 1.416(2)   | C12' | C11' | 1.383(2) |

**Table S6. Bond Angles for 7060-11161\_lia501.**

| Atom | Atom | Atom | Angle/°    | Atom | Atom | Atom | Angle/°    |
|------|------|------|------------|------|------|------|------------|
| C6   | O2   | C7   | 116.48(11) | C1'  | C2'  | C5'  | 125.19(13) |
| C6'  | O2'  | C7'  | 116.53(11) | C1'  | C2'  | C3'  | 108.03(13) |
| C1   | N1   | C4   | 110.62(12) | C5'  | C2'  | C3'  | 126.50(13) |
| C1'  | N1'  | C4'  | 110.85(12) | C12  | C13  | C8   | 120.97(14) |
| C2   | C3   | C8   | 123.42(12) | C10' | C9'  | C8'  | 120.36(14) |
| C4   | C3   | C2   | 106.21(12) | C10  | C9   | C8   | 120.10(14) |
| C4   | C3   | C8   | 130.37(13) | C11' | C10' | C9'  | 120.25(14) |
| N1   | C1   | C2   | 107.16(12) | C12' | C13' | C8'  | 120.74(14) |
| N2   | C1   | N1   | 122.32(13) | O1   | C6   | O2   | 123.63(13) |
| N2   | C1   | C2   | 130.50(13) | O1   | C6   | C4   | 123.15(13) |
| C1   | C2   | C3   | 108.06(12) | O2   | C6   | C4   | 113.22(12) |
| C1   | C2   | C5   | 124.51(13) | N1'  | C4'  | C6'  | 117.77(13) |
| C5   | C2   | C3   | 127.19(13) | C3'  | C4'  | N1'  | 107.88(12) |
| N1'  | C1'  | N2'  | 122.44(13) | C3'  | C4'  | C6'  | 134.22(13) |
| N1'  | C1'  | C2'  | 107.05(12) | N1   | C4   | C6   | 117.89(12) |
| N2'  | C1'  | C2'  | 130.48(14) | C3   | C4   | N1   | 107.95(12) |
| C9'  | C8'  | C13' | 118.81(13) | C3   | C4   | C6   | 134.15(13) |
| C9'  | C8'  | C3'  | 122.02(13) | N3'  | C5'  | C2'  | 179.36(17) |
| C13' | C8'  | C3'  | 119.11(13) | C2'  | C3'  | C8'  | 123.54(13) |
| N3   | C5   | C2   | 178.90(15) | C4'  | C3'  | C8'  | 130.25(13) |
| O2'  | C6'  | C4'  | 113.55(12) | C4'  | C3'  | C2'  | 106.20(12) |
| O1'  | C6'  | O2'  | 123.08(13) | C11  | C12  | C13  | 119.83(14) |
| O1'  | C6'  | C4'  | 123.38(13) | C9   | C10  | C11  | 120.53(14) |
| C13  | C8   | C3   | 119.37(13) | C11' | C12' | C13' | 119.89(14) |
| C13  | C8   | C9   | 118.82(13) | C12  | C11  | C10  | 119.75(14) |
| C9   | C8   | C3   | 121.74(13) | C12' | C11' | C10' | 119.94(14) |

**Table S7. Hydrogen Atom Coordinates ( $\text{\AA}\times 10^4$ ) and Isotropic Displacement Parameters ( $\text{\AA}^2\times 10^3$ ) for 7060-11161\_lia501.**

| Atom | x        | y       | z        | U(eq) |
|------|----------|---------|----------|-------|
| H1   | 1137.8   | 4110.54 | 5060.16  | 19    |
| H1'  | 5152.76  | 4968.8  | 4038.96  | 20    |
| H2A  | 2624.9   | 2752.26 | 3760.82  | 23    |
| H2B  | 3755.52  | 1662.28 | 4114.28  | 23    |
| H2'A | 3587.71  | 6224.78 | 2686.39  | 25    |
| H2'B | 3877.83  | 5858.26 | 1606.98  | 25    |
| H13  | 5530.95  | 1781.38 | 7885.65  | 20    |
| H9'  | 10578.32 | 1794.39 | 3036.41  | 21    |
| H9   | -189.99  | 2856.52 | 8687.87  | 21    |
| H10' | 12231.45 | 96.75   | 2476.51  | 23    |
| H13' | 6012.12  | 1666.71 | 1653.85  | 22    |
| H12  | 5967.07  | 1168.6  | 9576.33  | 25    |
| H10  | 248.61   | 2199.91 | 10369.26 | 23    |
| H12' | 7651.09  | -43.41  | 1123.54  | 25    |
| H11  | 3318.24  | 1359.06 | 10818.81 | 25    |
| H11' | 10772.36 | -824.65 | 1523.29  | 26    |
| H7'A | 9665.82  | 913.7   | 5669.04  | 35    |
| H7'B | 7583.44  | 1494.14 | 6167.85  | 35    |
| H7'C | 9226.73  | 2078.67 | 6070.82  | 35    |
| H7A  | -395.7   | 6349.15 | 8154.48  | 33    |
| H7B  | -651.44  | 5687.32 | 9199.06  | 33    |
| H7C  | -2134.19 | 5836.81 | 8386.52  | 33    |



## 4. References

- (1) Gaussian 16, Revision A.03, Frisch, M. J.; Trucks, G. W.; Schlegel, H. B.; Scuseria, G. E.; Robb, M. A.; Cheeseman, J. R.; Scalmani, G.; Barone, V.; Petersson, G. A.; Nakatsuji, H.; Li, X.; Caricato, M.; Marenich, A. V.; Bloino, J.; Janesko, B. G.; Gomperts, R.; Mennucci, B.; Hratchian, H. P.; Ortiz, J. V.; Izmaylov, A. F.; Sonnenberg, J. L.; Williams-Young, D.; Ding, F.; Lipparini, F.; Egidi, F.; Goings, J.; Peng, B.; Petrone, A.; Henderson, T.; Ranasinghe, D.; Zakrzewski, V. G.; Gao, J.; Rega, N.; Zheng, G.; Liang, W.; Hada, M.; Ehara, M.; Toyota, K.; Fukuda, R.; Hasegawa, J.; Ishida, M.; Nakajima, T.; Honda, Y.; Kitao, O.; Nakai, H.; Vreven, T.; Throssell, K.; Montgomery, J. A., Jr.; Peralta, J. E.; Ogliaro, F.; Bearpark, M. J.; Heyd, J. J.; Brothers, E. N.; Kudin, K. N.; Staroverov, V. N.; Keith, T. A.; Kobayashi, R.; Normand, J.; Raghavachari, K.; Rendell, A. P.; Burant, J. C.; Iyengar, S. S.; Tomasi, J.; Cossi, M.; Millam, J. M.; Klene, M.; Adamo, C.; Cammi, R.; Ochterski, J. W.; Martin, R. L.; Morokuma, K.; Farkas, O.; Foresman, J. B.; Fox, D. J. Gaussian, Inc., Wallingford CT, 2016.
- (2) (a) Becke, A. D. *J. Chem. Phys.* **1993**, *98*, 5648–5652. (b) Becke, A. D. *Phys. Rev. A* **1988**, *38*, 3098–3100. (c) Lee, C.; Yang, W.; Parr, R. G. *Phys. Rev. B* **1988**, *37*, 785–789.
- (3) (a) Grimme, S.; Antony, J.; Ehrlich, S.; Krieg, H. *J. Chem. Phys.* **2010**, *132*, 1054104. (b) Grimme, S.; Ehrlich, S.; Goerigk, L. *J. Comput. Chem.* **2011**, *32*, 1456–1465.
- (4) Marenich, A. V.; Cramer, C. J.; Truhlar, D. G. *J. Phys. Chem. B*, **2009**, *11*, 6378–6396.
- (5) Dolomanov, O.V., Bourhis, L.J., Gildea, R.J, Howard, J.A.K. & Puschmann, H., *J. Appl. Cryst.*, **2009**, *42*, 339–341.
- (6) Sheldrick, G.M. *Acta Cryst.*, **2015**, *A71*, 3–8.
- (7) Sheldrick, G.M. *Acta Cryst.*, **2015**, *C71*, 3–8.
